# Supplementary material for: Copper-catalyzed direct C–H fluoroalkenylation of heteroarenes
Source: Royal Society of Chemistry journal article supplement (doi:10.1039/c5ob02213d), 2015-11-25

## **Copper-Catalyzed Direct C-H Fluoroalkenylation of Heteroarenes**

Kevin Rousée, Cédric Schneider, Jean-Philippe Bouillon, Vincent Levacher,  
Christophe Hoarau,\* Samuel Couve-Bonnaire\* and Xavier Pannecoucke

Normandie Univ, COBRA, UMR 6014 & FR 3038; Univ Rouen; INSA Rouen; CNRS,  
IRCOF, 1 rue Tesnière, 76821 Mont-Saint-Aignan Cedex, France

E-mail: [samuel.couve-bonnaire@insa-rouen.fr](mailto:samuel.couve-bonnaire@insa-rouen.fr) and [christophe.hoarau@insa-rouen.fr](mailto:christophe.hoarau@insa-rouen.fr)

Supporting information

Table of content:

|                                                                                                            |            |
|------------------------------------------------------------------------------------------------------------|------------|
| 1. General information .....                                                                               | <b>S3</b>  |
| 2. Optimization of the reaction conditions .....                                                           | <b>S4</b>  |
| a. Optimization of the copper-catalyzed fluoroalkenylation on 5-phenyl-1,3-oxazole .....                   | <b>S4</b>  |
| b. Optimization of the copper-catalyzed fluoroalkenylation on 1-methyl-1 <i>H</i> -benzo[d]imidazole ..... | <b>S5</b>  |
| c. Optimization of the copper-catalyzed fluoroalkenylation on 4,5-dimethylthiazole .....                   | <b>S5</b>  |
| d. Comparison between dppe and Phen ligands for the coupling of different heteroaryles .....               | <b>S6</b>  |
| 3. General procedures .....                                                                                | <b>S6</b>  |
| a. General procedure for cross-coupling reaction.....                                                      | <b>S6</b>  |
| b. Synthesis of benzoxazoles .....                                                                         | <b>S6</b>  |
| 4. Experimental data.....                                                                                  | <b>S7</b>  |
| a. <i>Gem</i> -bromofluoroalkenes – Compounds <b>1A - 1H</b> .....                                         | <b>S7</b>  |
| b. Variation of <i>gem</i> -bromofluoroalkene - Compounds <b>3Aa - 3Ha</b> .....                           | <b>S10</b> |
| c. Reluctant substrates .....                                                                              | <b>S15</b> |
| d. Variation of phenyloxazole – Compounds <b>3Ab - 3Ce</b> .....                                           | <b>S16</b> |
| e. Variation of heteroaryle - Compounds <b>4Aa - 7G</b> .....                                              | <b>S22</b> |
| 5. <sup>1</sup> H, <sup>13</sup> C and <sup>19</sup> F NMR spectra.....                                    | <b>S30</b> |

## 1. General information

Commercially available reagents were used without further purification. Reactions were carried out under a nitrogen atmosphere using oven or flame-dried glassware. Anhydrous solvents were purchased from Sigma-Aldrich. THF (Na/benzophenone),  $\text{CH}_2\text{Cl}_2$  ( $\text{CaH}_2$ ) and toluene ( $\text{CaH}_2$ ) were dried and distilled prior to use. *t*-BuOLi was sublimated before use. All reactions were monitored by thin-layer chromatography with Merck silica gel 60 F254 pre-coated aluminium plates (0.25 mm). Flash chromatography was carried out using Silicaflash P60 silica gel (40-60  $\mu\text{m}$ ). Melting points (mp) were determined on a Fisher Scientific hot stage melting point apparatus and are uncorrected.  $^1\text{H}$ ,  $^{13}\text{C}$  and  $^{19}\text{F}$  NMR spectra were recorded using a Bruker Avance-300 spectrometer operating at 300 MHz ( $^1\text{H}$ ), 75 MHz ( $^{13}\text{C}$ ) and 282 MHz ( $^{19}\text{F}$ ), respectively. The chemical shifts ( $\delta$ ) were calibrated on residual proton and carbon resonance of  $\text{CDCl}_3$  ( $^1\text{H}$ , 7.26 ppm and  $^{13}\text{C}$ , 77.2 ppm). In the  $^{13}\text{C}$  NMR spectra, signals corresponding to CH,  $\text{CH}_2$ , or  $\text{CH}_3$  groups were assigned from DEPT-135. The multiplicity signals were indicated with the common abbreviations s (singlet), d (doublet), t (triplet), q (quartet), m (multiplet) and the combinations thereof. IR spectra were recorded on Perkin Elmer Spectrum 100 FT IR spectrometer. Low resolution mass spectra (MS) were performed with Jeol JMS-AX500 spectrometer in chemical ionisation (CI) or electrospray ionisation (ESI). High resolution mass spectra (HRMS) were recorded on a LC Waters Acquity coupled to a Waters LCT Premier XE instrument.

### Preparation of some reactants:

- *Gem*-bromofluoroalkenes were synthesized according to X. Lei, G. Dutheuil, X. Pannecoucke and J. -C. Quirion, *Org. Lett.*, 2004, **6**, 2101; from the appropriate aldehyde and tribromofluoromethane.
- Phenylloxazoles **2a** – **2d** were synthesized according to A. M. van Leusen, B. E. Hoogenboom and H. Siderius, *Tetrahedron Lett.*, 1972, **13**, 3114; from tosylmethylisocyanide and appropriate aldehyde.

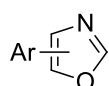

Ar = 5-phenyl; **2a**  
 Ar = 5-(4-methoxyphenyl); **2b**  
 Ar = 5-(4-trifluoromethylphenyl); **2c**  
 Ar = 5-naphthyl; **2d**  
 Ar = 4-phenyl; **2e**

## 2. Optimization of the reaction conditions

### a. Optimization of the copper-catalyzed fluoroalkenylation on 5-phenyl-1,3-oxazole

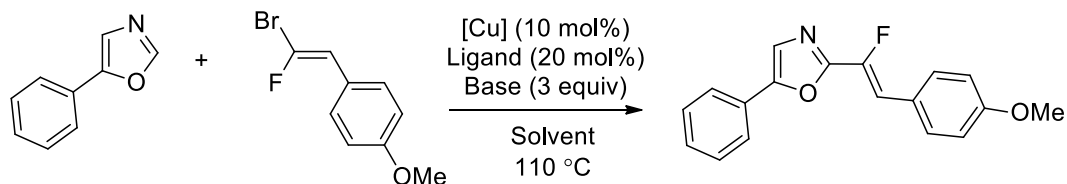

| Entry <sup>a</sup> | [Cu]                 | Ligand                            | Base                           | Solvent            | Yield [%] <sup>b</sup> |
|--------------------|----------------------|-----------------------------------|--------------------------------|--------------------|------------------------|
| 1                  | CuI                  | Phen                              | <i>t</i> -BuOLi                | 1,4-Dioxane        | 51                     |
| 2                  | CuI                  | Phen                              | <i>t</i> -BuOLi                | Toluene            | 29                     |
| 3                  | CuI                  | Phen                              | <i>t</i> -BuOLi                | DMF                | 1                      |
| 4                  | CuI                  | PPh <sub>3</sub>                  | <i>t</i> -BuOLi                | 1,4-Dioxane        | 83                     |
| <b>5</b>           | <b>CuI</b>           | <b>dppe</b>                       | <b><i>t</i>-BuOLi</b>          | <b>1,4-Dioxane</b> | <b>96</b>              |
| 6                  | CuI                  | -                                 | <i>t</i> -BuOLi                | 1,4-Dioxane        | 65                     |
| 7                  | CuI                  | L <sub>1</sub> <sup>c</sup>       | <i>t</i> -BuOLi                | 1,4-Dioxane        | 51                     |
| 8                  | CuI                  | PCy <sub>3</sub> HBF <sub>4</sub> | <i>t</i> -BuOLi                | 1,4-Dioxane        | 51                     |
| 9                  | CuI                  | L <sub>2</sub> <sup>d</sup>       | <i>t</i> -BuOLi                | 1,4-Dioxane        | 81                     |
| 10                 | CuI (5 mol%)         | dppe                              | <i>t</i> -BuOLi                | 1,4-Dioxane        | 85                     |
| 11                 | CuI                  | dppe                              | <i>t</i> -BuOLi (2 equiv)      | 1,4-Dioxane        | 80                     |
| 12                 | CuI                  | dppe                              | K <sub>2</sub> CO <sub>3</sub> | 1,4-Dioxane        | 0                      |
| 13                 | -                    | dppe                              | <i>t</i> -BuOLi                | 1,4-Dioxane        | 0                      |
| 14                 | Cu(OTf) <sub>2</sub> | dppe                              | <i>t</i> -BuOLi                | 1,4-Dioxane        | 65                     |
| 15                 | CuCl <sub>2</sub>    | dppe                              | <i>t</i> -BuOLi                | 1,4-Dioxane        | 73                     |
| 16                 | Cu(OAc) <sub>2</sub> | dppe                              | <i>t</i> -BuOLi                | 1,4-Dioxane        | 49                     |
| 17                 | CuBr                 | -                                 | <i>t</i> -BuOLi                | 1,4-Dioxane        | 63                     |
| 18                 | CuBr                 | dppe                              | <i>t</i> -BuOLi                | 1,4-Dioxane        | 66                     |
| 19 <sup>e</sup>    | CuI                  | dppe                              | <i>t</i> -BuOLi                | 1,4-Dioxane        | 19                     |
| 20 <sup>f</sup>    | CuI                  | dppe                              | <i>t</i> -BuOLi                | 1,4-Dioxane        | 42                     |
| 21 <sup>g</sup>    | CuI                  | dppe                              | <i>t</i> -BuOLi                | 1,4-Dioxane        | 28                     |
| 22 <sup>h</sup>    | CuI                  | dppe                              | <i>t</i> -BuOLi                | 1,4-Dioxane        | 0                      |

<sup>a</sup>Reaction conditions: [Cu] (10 mol%), ligand (20 mol%), base (3 equiv), solvent (0.25 M), 110 °C, 12 h. <sup>b</sup>Yield based on isolated product after flash chromatography. <sup>c</sup>L<sub>1</sub> = 3,4,7,8-(Me)<sub>4</sub>-1,10-Phen. <sup>d</sup>L<sub>2</sub> = *Trans*-*N,N'*-dimethylcyclohexa-1,2-diamine. <sup>e</sup>Under air atmosphere. <sup>f</sup>With 50 mg of 4 Å molecular sieve. <sup>g</sup>With 5 mol% of water. <sup>h</sup>With 10 mol% of water.

b. Optimization of the copper-catalyzed fluoroalkenylation on 1-methyl-1*H*-benzo[d]imidazole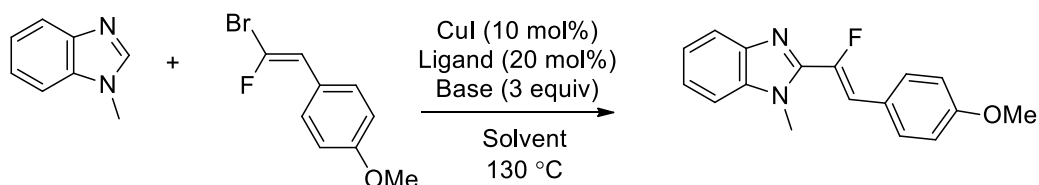

| Entry <sup>a</sup> | Ligand                                  | Base                            | Solvent            | Yield [%] <sup>b</sup> |
|--------------------|-----------------------------------------|---------------------------------|--------------------|------------------------|
| 1                  | Phen                                    | <i>t</i> -BuOLi                 | 1,4-Dioxane        | 0 <sup>d</sup>         |
| 2                  | Phen                                    | <i>t</i> -BuOLi                 | 1,4-Dioxane        | 43                     |
| 3                  | Phen                                    | <i>t</i> -BuOLi                 | DMF                | 0                      |
| 4                  | dppe                                    | <i>t</i> -BuOLi                 | 1,4-Dioxane        | Traces                 |
| <b>5</b>           | <b><i>L</i><sub>2</sub><sup>c</sup></b> | <b><i>t</i>-BuOLi</b>           | <b>1,4-Dioxane</b> | <b>54</b>              |
| 6                  | <i>L</i> <sub>2</sub> <sup>c</sup>      | Cs <sub>2</sub> CO <sub>3</sub> | 1,4-Dioxane        | 0                      |
| 7                  | <i>L</i> <sub>2</sub> <sup>c</sup>      | K <sub>2</sub> CO <sub>3</sub>  | 1,4-Dioxane        | 39                     |
| 8                  | <i>L</i> <sub>2</sub> <sup>c</sup>      | <i>t</i> -BuOK                  | 1,4-Dioxane        | 0                      |

<sup>a</sup>Reaction conditions: CuI (10 mol%), ligand (20 mol%), base (3 equiv), solvent (0.25 M), 130 °C, 12 h.

<sup>b</sup>Yield based on isolated product after flash chromatography. <sup>c</sup>*L*<sub>2</sub> = *Trans*-*N,N'*-dimethylcyclohexa-1,2-diamine. <sup>d</sup>Performed at 110 °C.

## c. Optimization of the copper-catalyzed fluoroalkenylation on 4,5-dimethylthiazole

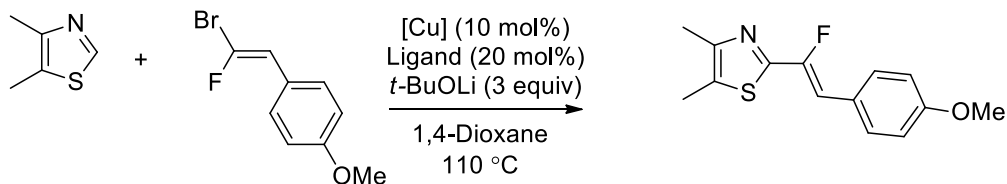

| Entry <sup>a</sup> | [Cu]                 | Ligand                | Yield [%] <sup>b</sup> |
|--------------------|----------------------|-----------------------|------------------------|
| 1                  | CuCl                 | Phen                  | 30                     |
| 2                  | CuBr                 | Phen                  | 29                     |
| 3                  | CuI                  | Phen                  | 52                     |
| <b>4</b>           | <b>CuI (20 mol%)</b> | <b>Phen (40 mol%)</b> | <b>71</b>              |
| 5                  | CuI                  | dppe                  | 12                     |

<sup>a</sup>Reaction conditions: [Cu] (10 mol%), ligand (20 mol%), base (3 equiv), 1,4-dioxane (0.25 M), 130 °C, 12 h. <sup>b</sup>Yield based on isolated product after flash chromatography.

## d. Comparison between dppe and Phen ligands for the coupling of different heteroaryles

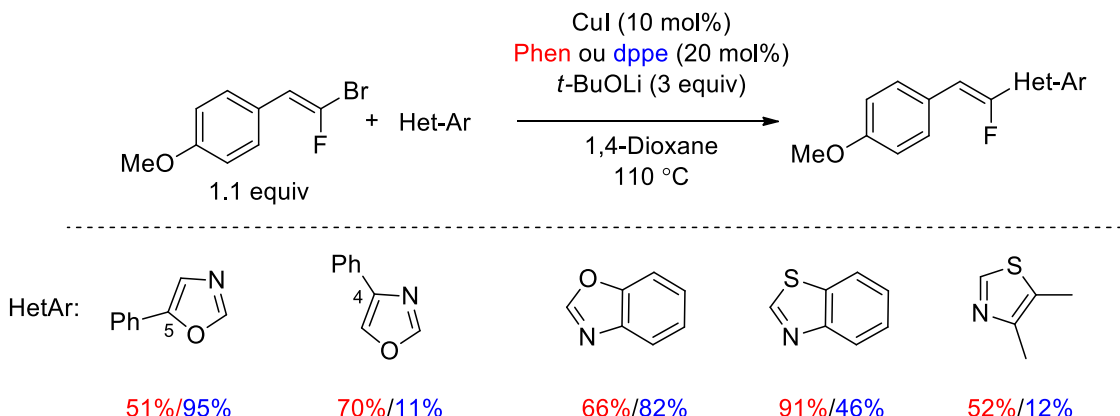

## 3. General procedures

## a. General procedure for cross-coupling reaction

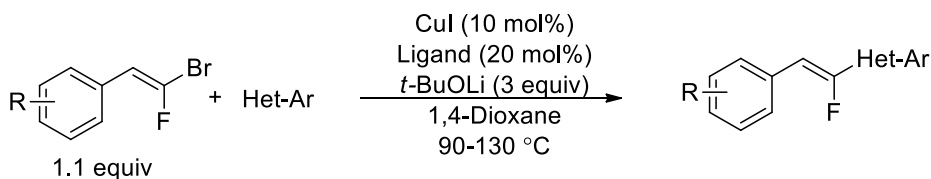

In a dry vial, was added *gem*-bromofluoroalkene (1.1 equiv), heteroaryl (1 equiv), CuI (10 mol%), ligand (20 mol%) and *t*-BuOLi (3 equiv). The vial was flushed under argon, then filled with dry 1,4-dioxane (4 mL/mmol). The reaction mixture was heated for the night at 110 °C. The mixture was poured into aqueous NH<sub>4</sub>Cl solution (25 mL), then was extracted with CH<sub>2</sub>Cl<sub>2</sub> (25 mL) three time, then dried over MgSO<sub>4</sub>, filtered and concentrated. The crude was purified over silica gel column to afford the pure product.

## b. Synthesis of benzoxazoles

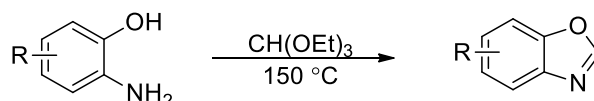

To triethylorthoformate (1.5 ml/mmol) was added 2-aminophenol (1 equiv). The mixture was heated for the night at 150 °C. After distillation to remove EtOH and CH(OEt)<sub>3</sub>, the crude was then purified over silica gel column to afford the pure benzoxazole.

## 4. Experimental data

### a. *Gem*-bromofluoroalkenes – Compounds **1A** - **1H**

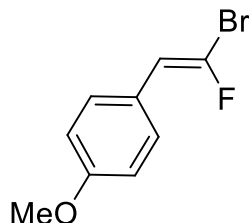

**(E)-1-(2-Bromo-2-fluorovinyl)-4-methoxybenzene (1A)**: mixture of *E/Z* (1/1) 1-(2-bromo-2-fluorovinyl)-4-methoxybenzene (9.6 mmol, 2.2 g), LiHMDS (5.7 mmol, 5.7 mL), THF (50 mL) were reacted according to general procedure. The crude product was purified by silica gel column chromatography (PE) affording compound **1A** in 45% yield (1.0 g) as a yellow solid. Exhibited spectral data were identical to previous report: X. Lei, G. Dutheuil, X. Pannecoucke and J. -C. Quirion, *Org. Lett.*, 2004, **6**, 2101.

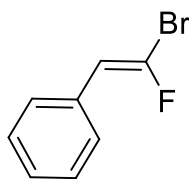

**(E)-1-(2-Bromo-2-fluorovinyl)benzene (1B)**: mixture of *E/Z* (1/1) 1-(2-bromo-2-fluorovinyl)-benzene (4.8 mmol, 1.0 g), LiHMDS (2.9 mmol, 3.2 mL), THF (25 mL) were reacted according to general procedure. The crude product was purified by silica gel column chromatography (PE) affording compound **1B** in 49% yield (0.5 g) as a colorless oil. IR: 3061, 1646, 1495, 1448, 1041, 914, 846, 831, 806  $\text{cm}^{-1}$ .  $^1\text{H}$  NMR (300 MHz,  $\text{CDCl}_3$ ):  $\delta$  7.44-7.23 (m, 5H), 5.98 (d,  $J$  = 32.9 Hz, 1H).  $^{19}\text{F}$  NMR (282 MHz,  $\text{CDCl}_3$ ):  $\delta$  -67.8 (d,  $J$  = 32.7 Hz).  $^{13}\text{C}$  NMR (75 MHz,  $\text{CDCl}_3$ ):  $\delta$  134.0 (d,  $J$  = 329.3 Hz, Cq), 132.6 (d,  $J$  = 4.5 Hz, Cq), 128.8 (s, 2xCH), 128.2 (d,  $J$  = 7.5 Hz, 2xCH), 128.0 (d,  $J$  = 2.3 Hz, CH), 113.2 (d,  $J$  = 6.0 Hz, CH). MS (CI-TOF):  $m/z$  200  $[\text{M}+\text{H}^+]$ . HRMS (CI-TOF): calcd for  $\text{C}_8\text{H}_7\text{BrF}$   $m/z$  200.9715  $[\text{M}+\text{H}^+]$ , found: 200.9712.

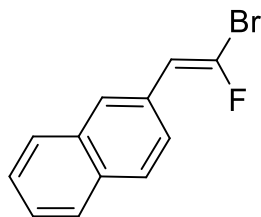

**(E)-2-(2-Bromo-2-fluorovinyl)naphthalene (1C):** mixture of *E/Z* (1/1) 2-(2-bromo-2-fluorovinyl)naphthalene (10.4 mmol, 2.6 g), LiHMDS (6.3 mmol, 7.0 mL), THF (50 mL) were reacted according to general procedure. The crude product was purified by silica gel column chromatography (PE) affording compound **1C** in 45% yield (1.2 g) as a colorless solid. Exhibited spectral data were identical to previous report: X. Lei, G. Dutheuil, X. Pannecoucke and J. -C. Quirion, *Org. Lett.*, 2004, **6**, 2101.

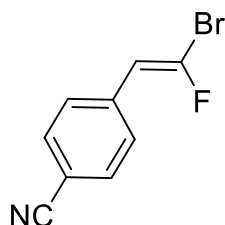

**(E)-4-(2-Bromo-2-fluorovinyl)benzonitrile (1D):** mixture of *E/Z* (3/2) 4-(2-bromo-2-fluorovinyl)benzonitrile (7.4 mmol, 1.7 g), LiHMDS (4.4 mmol, 4.4 mL), THF (40 mL) were reacted according to general procedure. The crude product was purified by silica gel column chromatography (PE) affording compound **1D** in 55% yield (0.9 g) as a colorless solid. Exhibited spectral data were identical to previous report: X. Lei, G. Dutheuil, X. Pannecoucke and J. -C. Quirion, *Org. Lett.*, 2004, **6**, 2101.

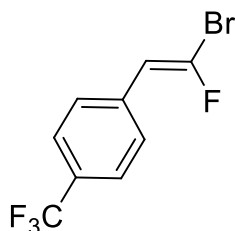

**(E)-1-(2-Bromo-2-fluorovinyl)-4-trifluoromethylbenzene (1E):** mixture of *E/Z* (1/1) 1-(2-bromo-2-fluorovinyl)-4-trifluoromethylbenzene (4.8 mmol, 1.3 g), LiHMDS (2.9 mmol, 2.9 mL), THF (25 mL) were reacted according to general procedure. The crude product was purified by silica gel column chromatography (PE) affording compound **1E** in 29% yield (0.4 g) as a colorless liquid. Exhibited spectral data were identical to previous report: X. Lei, G. Dutheuil, X. Pannecoucke and J. -C. Quirion, *Org. Lett.*, 2004, **6**, 2101.



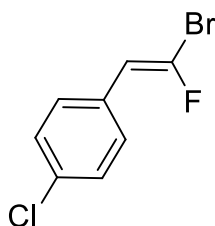

**(E)-1-(2-Bromo-2-fluorovinyl)-4-chlorobenzene (1F):** mixture of *E/Z* (1/1) 1-(2-bromo-2-fluorovinyl)-4-chlorobenzene (2.12 mmol, 0.50 g), LiHMDS (1.28 mmol, 1.28 mL), THF (10 mL) were reacted according to general procedure. The crude product was purified by silica gel column chromatography (PE) affording compound **1F** in 50% yield (250 mg) as a colorless liquid, which sometimes crystallized at room temperature. IR: 3081, 2937, 2838, 1647, 1598, 1580, 1487, 1461, 1436, 1280, 1247, 1111, 1026, 818  $\text{cm}^{-1}$ .  $^1\text{H}$  NMR (300 MHz,  $\text{CDCl}_3$ ):  $\delta$  7.32 (m, 4H), 5.94 (d,  $J = 33.0$  Hz, 1H).  $^{19}\text{F}$  NMR (282 MHz,  $\text{CDCl}_3$ ):  $\delta$  -67.1 (d,  $J = 32.4$  Hz).  $^{13}\text{C}$  NMR (75 MHz,  $\text{CDCl}_3$ ):  $\delta$  134.4 (d,  $J = 329.3$  Hz, Cq), 133.6 (d,  $J = 3.8$  Hz, Cq), 131.0 (d,  $J = 4.5$  Hz, Cq), 129.3 (d,  $J = 8.3$  Hz, 2xCH), 128.9 (s, 2xCH), 112.1 (d,  $J = 6.0$  Hz, CH). MS (CI-TOF):  $m/z$  234 [ $\text{M}+\text{H}^+$ ]. HRMS (CI-TOF): calcd for  $\text{C}_8\text{H}_6\text{BrClF}$   $m/z$  234.9325 [ $\text{M}+\text{H}^+$ ], found: 234.9337.

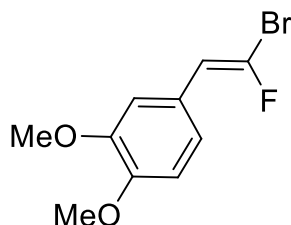

**(E)-4-(2-Bromo-2-fluorovinyl)-1,2-dimethoxybenzene (1G):** mixture of *E/Z* (1/1) 4-(2-bromo-2-fluorovinyl)-1,2-dimethoxybenzene (3.8 mmol, 1.0 g), LiHMDS (2.3 mmol, 2.3 mL), THF (25 mL) were reacted according to general procedure. The crude product was purified by silica gel column chromatography (PE) affording compound **1G** in 50% yield (0.5 g) as a yellow liquid. Exhibited spectral data were identical to previous report: X. Lei, G. Dutheuil, X. Pannecoucke and J. -C. Quirion, *Org. Lett.*, 2004, **6**, 2101.

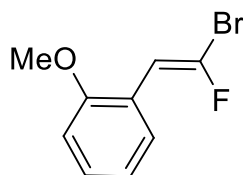

**(E)-1-(2-Bromo-2-fluorovinyl)-2-methoxybenzene (1H):** mixture of *E/Z* (55/45) 1-(2-bromo-2-fluorovinyl)-2-methoxybenzene (5.40 mmol, 1.24 g), LiHMDS (3.20 mmol, 3.2 mL), THF (25 mL) were reacted according to general procedure. The crude product was purified by silica gel column chromatography (PE) affording compound **1H** in 52% yield (645 mg) as a yellow oil. IR: 3081, 2837, 1646, 1598, 1580, 1487, 1461, 1436, 1247, 1111, 1026, 818 cm<sup>-1</sup>. <sup>1</sup>H NMR (300 MHz, CDCl<sub>3</sub>): δ 7.64 (d, *J* = 7.7 Hz, 1H), 7.27 (t, *J* = 7.7 Hz, 1H), 6.96 (t, *J* = 7.5 Hz, 1H), 6.88 (d, *J* = 8.3 Hz, 1H), 6.43 (d, *J* = 33.0 Hz, 1H), 3.84 (s, 3H). <sup>19</sup>F NMR (282 MHz, CDCl<sub>3</sub>): δ -69.1 (d, *J* = 33.8 Hz). <sup>13</sup>C NMR (75 MHz, CDCl<sub>3</sub>): δ 155.8 (d, *J* = 1.2 Hz, Cq), 133.5 (d, *J* = 330.2 Hz, Cq), 129.3 (d, *J* = 14.1 Hz, CH), 129.2 (s, CH), 121.4 (d, *J* = 4.9 Hz, Cq), 120.8 (s, CH), 110.7 (d, *J* = 0.6 Hz, CH), 107.0 (d, *J* = 4.6 Hz, CH), 55.6 (s, CH<sub>3</sub>). MS (CI-TOF): *m/z* 230 [M+H<sup>+</sup>]. HRMS (ESI-TOF): calcd for C<sub>9</sub>H<sub>9</sub>BrFO *m/z* 230.9821 [M+H<sup>+</sup>], found: 230.9821.

b. Variation of *gem*-bromofluoroalkene - Compounds **3Aa** - **3Ha**

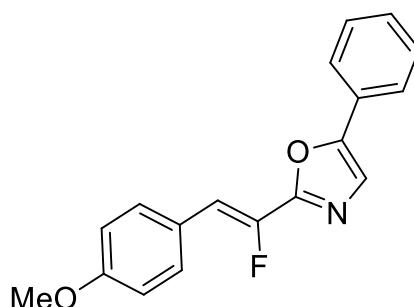

**(Z)-2-(1-Fluoro-2-(4-methoxyphenyl)vinyl)-5-phenyloxazole (3Aa):** (*E*)-1-(2-bromo-2-fluorovinyl)-4-methoxybenzene (0.22 mmol, 51 mg), 5-phenyloxazole (0.20 mmol, 29 mg), CuI (0.02 mmol, 4 mg), dppe (0.04 mmol, 16 mg), *t*-BuOLi (0.60 mmol, 48 mg), 1,4-dioxane (0.8 mL) were reacted according to general procedure. The crude product was purified by silica gel column chromatography (PE/CH<sub>2</sub>Cl<sub>2</sub>, 5/5) affording compound **3Aa** in 96% yield (56 mg) as a colorless solid. Exhibited spectral data were identical to previous report: C. Schneider, D. Masi, S. Couve-Bonnaire, X. Pannecoucke and C. Hoarau, *Angew. Chem. Int. Ed.*, 2013, **52**, 3246.

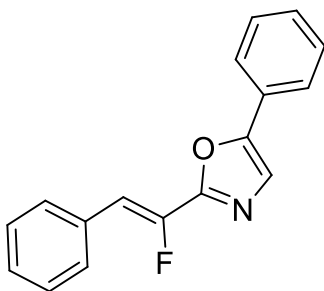

**(Z)-2-(1-Fluoro-2-phenylvinyl)-5-phenyloxazole (3Ba):** (*E*)-(2-bromo-2-fluorovinyl)-benzene (0.22 mmol, 44 mg), 5-phenyloxazole (0.20 mmol, 29 mg), CuI (0.02 mmol, 4 mg), dppe (0.04 mmol, 16 mg), *t*-BuOLi (0.60 mmol, 48 mg), 1,4-dioxane (0.8 mL) were reacted according to general procedure. The crude product was purified by silica gel column chromatography (PE/CH<sub>2</sub>Cl<sub>2</sub>, 5/5) affording compound **3Ba** in 89% yield (47 mg) as a colorless solid. mp 89-91 °C (CH<sub>2</sub>Cl<sub>2</sub>/PE). IR: 3050, 1531, 1487, 1444, 1354, 1137, 1025, 957, 943, 820 cm<sup>-1</sup>. <sup>1</sup>H NMR (300 MHz, CDCl<sub>3</sub>): δ 7.70 (m, 4H), 7.49-7.32 (m, 7H), 6.79 (d, *J* = 37.5 Hz, 1H). <sup>19</sup>F NMR (282 MHz, CDCl<sub>3</sub>): δ -126.5 (d, *J* = 37.5 Hz). <sup>13</sup>C NMR (75 MHz, CDCl<sub>3</sub>): δ 155.2 (d, *J* = 37.5 Hz, Cq), 152.2 (s, Cq), 146.1 (d, *J* = 255.1 Hz, Cq), 132.1 (d, *J* = 3.9 Hz, Cq), 129.7 (d, *J* = 7.8 Hz, 2xCH), 129.10 (s, 2xCH), 129.06 (s, CH), 128.9 (s, 2xCH), 128.8 (s, CH), 127.4 (s, Cq), 124.5 (s, 2xCH), 123.8 (d, *J* = 1.3 Hz, CH), 111.5 (d, *J* = 5.0 Hz, CH). MS (ESI-TOF): *m/z* 266 [M+H<sup>+</sup>]. HRMS (ESI-TOF): calcd for C<sub>17</sub>H<sub>13</sub>FNO *m/z* 266.0981 [M+H<sup>+</sup>], found: 266.0968.

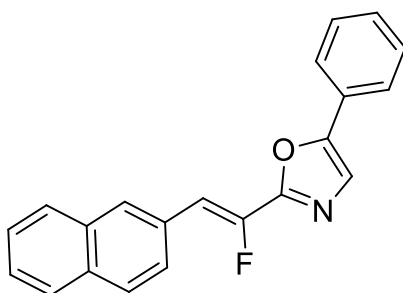

**(Z)-2-(1-Fluoro-2-(naphth-2-yl)vinyl)-5-phenyloxazole (3Ca):** (*E*)-2-(2-bromo-2-fluorovinyl)naphthalene (0.22 mmol, 55 mg), 5-phenyloxazole (0.20 mmol, 29 mg), CuI (0.02 mmol, 4 mg), dppe (0.04 mmol, 16 mg), *t*-BuOLi (0.60 mmol, 48 mg), 1,4-dioxane (0.8 mL) were reacted according to general procedure. The crude product was purified by silica gel column chromatography (PE/CH<sub>2</sub>Cl<sub>2</sub>, 3/7) affording compound **3Ca** in 94% yield (59 mg) as a yellow solid. mp 149-151 °C (CH<sub>2</sub>Cl<sub>2</sub>/PE). IR: 3057, 1660, 1593, 1531, 1485, 1449, 1344, 1320, 1062, 963, 949, 905, 875, 821 cm<sup>-1</sup>. <sup>1</sup>H NMR (300 MHz, CDCl<sub>3</sub>): δ 8.12 (s, 1H), 7.90-7.80 (m, 4H), 7.72 (d, *J* = 6.4 Hz, 2H), 7.52-7.45 (m, 5H), 7.40 (d, *J* = 6.4 Hz, 1H), 6.96 (d, *J*

= 37.5 Hz, 1H).  $^{19}\text{F}$  NMR (282 MHz,  $\text{CDCl}_3$ ):  $\delta$  -126.5 (d,  $J$  = 37.6 Hz).  $^{13}\text{C}$  NMR (75 MHz,  $\text{CDCl}_3$ ):  $\delta$  152.2 (s, Cq), 146.2 (d,  $J$  = 253.5 Hz, Cq), 133.4 (s, Cq), 133.2 (d,  $J$  = 1.5 Hz, Cq), 129.7 (s, Cq), 129.7 (d,  $J$  = 7.5, CH), 129.6 (s, Cq), 129.1 (s, 2xCH), 129.1 (s, CH), 128.5 (d,  $J$  = 2.3 Hz, CH), 127.8 (s, CH), 127.4 (s, Cq), 126.9 (s, CH), 126.8 (s, CH), 126.7 (s, CH), 126.6 (s, CH), 124.5 (s, 2xCH), 123.9 (s, CH), 111.7 (d,  $J$  = 4.5 Hz, CH). MS (ESI-TOF):  $m/z$  316  $[\text{M}+\text{H}^+]$ . HRMS (ESI-TOF): calcd for  $\text{C}_{21}\text{H}_{15}\text{FNO}$   $m/z$  316.1138  $[\text{M}+\text{H}^+]$ , found: 316.1136.

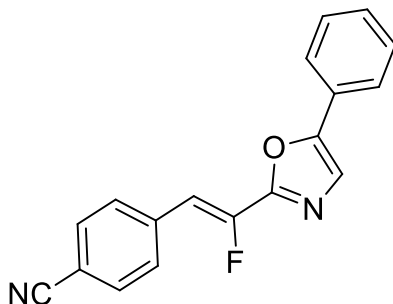

**(Z)-4-(2-Fluoro-2-(5-phenyloxazol-2-yl)vinyl)benzonitrile (3Da):** (*E*)-4-(2-bromo-2-fluorovinyl)benzonitrile (0.22 mmol, 50 mg), 5-phenyloxazole (0.20 mmol, 29 mg), CuI (0.02 mmol, 4 mg), dppe (0.04 mmol, 16 mg), *t*-BuOLi (0.60 mmol, 48 mg), 1,4-dioxane (0.8 mL) were reacted according to general procedure. The crude product was purified by silica gel column chromatography (PE/ $\text{CH}_2\text{Cl}_2$ , 5/5) affording compound **3Da** in 45% yield (26 mg) as a yellow solid. Exhibited spectral data were identical to previous report: C. Schneider, D. Masi, S. Couve-Bonnaire, X. Pannecoucke and C. Hoarau, *Angew. Chem. Int. Ed.*, 2013, **52**, 3246.

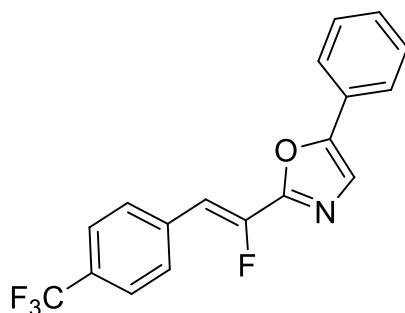

**(Z)-2-(1-Fluoro-2-(4-trifluoromethylphenyl)vinyl)-5-phenyloxazole (3Ea):** (*E*)-1-(2-bromo-2-fluorovinyl)-4-trifluoromethylbenzene (0.22 mmol, 59 mg), 5-phenyloxazole (0.20 mmol, 29 mg), CuI (0.02 mmol, 4 mg), dppe (0.04 mmol, 16 mg), *t*-BuOLi (0.60 mmol, 48 mg), 1,4-dioxane (0.8 mL) were reacted according to general procedure. The crude product was purified by silica gel column chromatography (PE/ $\text{CH}_2\text{Cl}_2$ , 5/5) affording compound **3Ea** in 62% yield (40 mg) as a yellow solid. mp 89-91 °C ( $\text{CH}_2\text{Cl}_2$ /PE). IR: 1615, 1486, 1406, 1322,

1167, 1115, 1066, 971, 958, 876, 828  $\text{cm}^{-1}$ .  $^1\text{H}$  NMR (300 MHz,  $\text{CDCl}_3$ ):  $\delta$  7.77 (d,  $J$  = 8.3 Hz, 2H), 7.70 (d,  $J$  = 7.1 Hz, 2H), 7.65 (d,  $J$  = 8.3 Hz, 2H), 7.51-7.33 (m, 4H), 6.81 (d,  $J$  = 36.6 Hz, 1H).  $^{19}\text{F}$  NMR (282 MHz,  $\text{CDCl}_3$ ):  $\delta$  -62.8 (s, 3F), -123.6 (d,  $J$  = 36.6 Hz, 1F).  $^{13}\text{C}$  NMR (75 MHz,  $\text{CDCl}_3$ ):  $\delta$  154.6 (d,  $J$  = 36.2 Hz, Cq), 152.7 (s, Cq), 147.3 (d,  $J$  = 258.1 Hz, Cq), 135.5 (d,  $J$  = 2.6 Hz, Cq), 130.4 (qd,  $J$  = 32.7, 2.8 Hz, Cq), 129.8 (d,  $J$  = 8.1 Hz, 2xCH), 129.4 (s, CH), 129.2 (s, 2xCH), 127.2 (s, Cq), 125.4 (q,  $J$  = 276.9 Hz, Cq), 125.9 (q,  $J$  = 3.7 Hz, 2xCH), 124.5 (s, 2xCH), 124.0 (d,  $J$  = 1.4 Hz, CH), 110.0 (d,  $J$  = 4.8 Hz, CH). MS (ESI-TOF):  $m/z$  334  $[\text{M}+\text{H}^+]$ . HRMS (ESI-TOF): calcd for  $\text{C}_{18}\text{H}_{12}\text{F}_4\text{NO}$   $m/z$  334.0855  $[\text{M}+\text{H}^+]$ , found: 334.0851.

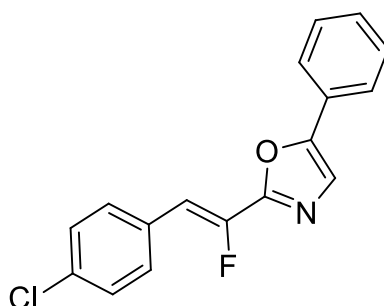

**(Z)-2-(1-Fluoro-2-(4-chlorophenyl)vinyl)-5-phenyloxazole (3Fa):** (*E*)-1-(2-bromo-2-fluorovinyl)-4-chlorobenzene (0.22 mmol, 52 mg), 5-phenyloxazole (0.20 mmol, 29 mg), CuI (0.02 mmol, 4 mg), dppe (0.04 mmol, 16 mg), *t*-BuOLi (0.60 mmol, 48 mg), 1,4-dioxane (0.8 mL) were reacted according to general procedure. The crude product was purified by silica gel column chromatography (PE/ $\text{CH}_2\text{Cl}_2$ , 5/5) affording compound **3Fa** in 71% yield (42 mg) as a colorless solid. mp 139-141  $^{\circ}\text{C}$  ( $\text{CH}_2\text{Cl}_2$ /PE). IR: 3066, 1653, 1486, 1408, 1351, 1335, 1138, 1082, 1012, 957, 941, 874, 810  $\text{cm}^{-1}$ .  $^1\text{H}$  NMR (300 MHz,  $\text{CDCl}_3$ ):  $\delta$  7.70 (d,  $J$  = 7.2 Hz, 2H), 7.60 (d,  $J$  = 8.6 Hz, 2H), 7.47-7.41 (m, 3H), 7.40-7.34 (m, 3H), 6.73 (d,  $J$  = 37.0 Hz, 1H).  $^{19}\text{F}$  NMR (282 MHz,  $\text{CDCl}_3$ ):  $\delta$  -125.9 (d,  $J$  = 36.9 Hz).  $^{13}\text{C}$  NMR (75 MHz,  $\text{CDCl}_3$ ):  $\delta$  154.9 (d,  $J$  = 33.8 Hz, Cq), 152.3 (s, Cq), 146.4 (d,  $J$  = 254.3 Hz, Cq), 134.6 (d,  $J$  = 3.8 Hz, Cq), 130.9 (d,  $J$  = 8.0 Hz, 2xCH), 130.7 (d,  $J$  = 3.8 Hz, Cq), 129.2 (s, 3xCH), 129.1 (s, 2xCH), 127.3 (s, Cq), 124.6 (d,  $J$  = 7.1 Hz, 2xCH), 123.9 (d,  $J$  = 1.4 Hz, CH), 110.3 (d,  $J$  = 5.0 Hz, CH). MS (ESI-TOF):  $m/z$  302  $[\text{M}+\text{H}^+]$ , 300  $[\text{M}+\text{H}^+]$ . HRMS (ESI-TOF): calcd for  $\text{C}_{17}\text{H}_{12}^{35}\text{ClFNO}$   $m/z$  300.0591  $[\text{M}+\text{H}^+]$ , found: 300.0596.

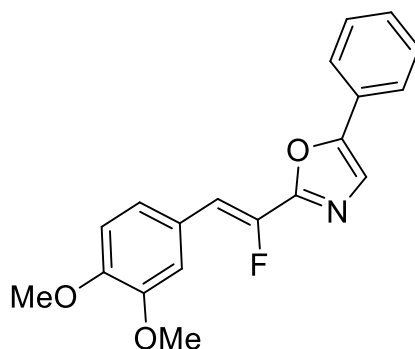

**(Z)-2-(1-Fluoro-2-(3,4-dimethoxyphenyl)vinyl)-5-phenyloxazole (3Ga):** (*E*)-1-(2-bromo-2-fluorovinyl)-3,4-dimethoxybenzene (0.22 mmol, 57 mg), 5-phenyloxazole (0.20 mmol, 29 mg), CuI (0.02 mmol, 4 mg), dppe (0.04 mmol, 16 mg), *t*-BuOLi (0.60 mmol, 48 mg), 1,4-dioxane (0.8 mL) were reacted according to general procedure. The crude product was purified by silica gel column chromatography (PE/CH<sub>2</sub>Cl<sub>2</sub>, 5/5) affording compound **3Ga** in 68% yield (44 mg) as a yellow solid. mp 120-122 °C (CH<sub>2</sub>Cl<sub>2</sub>/PE). IR: 3113, 2833, 1585, 1530, 1514, 1413, 1338, 1263, 1144, 1072, 1018, 869, 848, 803 cm<sup>-1</sup>. <sup>1</sup>H NMR (300 MHz, CDCl<sub>3</sub>): δ 7.71-7.67 (m, 2H), 7.48-7.42 (m, 3H), 7.38-7.36 (m, 1H), 7.30 (s, 1H), 7.24 (dd, *J* = 8.4, 2.0 Hz, 1H), 6.90 (d, *J* = 8.4 Hz, 1H), 6.74 (d, *J* = 37.7 Hz, 1H), 3.94 (s, 3H), 3.93 (s, 3H). <sup>19</sup>F NMR (282 MHz, CDCl<sub>3</sub>): δ -129.6 (d, *J* = 37.7 Hz). <sup>13</sup>C NMR (75 MHz, CDCl<sub>3</sub>): δ 151.9 (s, Cq), 149.8 (s, Cq), 149.7 (s, Cq), 149.0 (s, Cq), 145.0 (d, *J* = 252.1 Hz, Cq), 129.1 (s, 2xCH), 129.0 (s, CH), 127.5 (s, Cq), 125.0 (d, *J* = 4.0 Hz, Cq), 124.5 (s, 2xCH), 123.7 (s, CH), 123.4 (d, *J* = 7.2 Hz, CH), 112.2 (d, *J* = 9.2 Hz, CH), 111.5 (d, *J* = 5.0 Hz, CH), 111.2 (s, CH), 56.0 (s, CH<sub>3</sub>), 55.9 (s, CH<sub>3</sub>). MS (ESI-TOF): *m/z* 326 [M+H<sup>+</sup>]. HRMS (ESI-TOF): calcd for C<sub>19</sub>H<sub>17</sub>FN<sub>2</sub>O<sub>3</sub> *m/z* 326.1192 [M+H<sup>+</sup>], found: 326.1187.

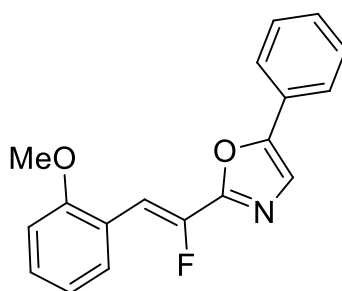

**(Z)-2-(1-Fluoro-2-(2-methoxyphenyl)vinyl)-5-phenyloxazole (3Ha):** (*E*)-1-(2-bromo-2-fluorovinyl)-2-methoxybenzene (0.22 mmol, 51 mg), 5-phenyloxazole (0.20 mmol, 29 mg), CuI (0.02 mmol, 4 mg), dppe (0.04 mmol, 16 mg), *t*-BuOLi (0.60 mmol, 48 mg), 1,4-dioxane (0.8 mL) were reacted according to general procedure. The crude product was purified by silica gel column chromatography (PE/CH<sub>2</sub>Cl<sub>2</sub>, 3/7) affording compound **3Ha** in 58% yield (34 mg)

as a colorless solid. mp 135-137 °C (CH<sub>2</sub>Cl<sub>2</sub>/PE). IR: 3098, 2924, 1570, 1532, 1485, 1463, 1435, 1350, 1284, 1242, 1111, 1024, 957, 944, 851, 844, 821 cm<sup>-1</sup>. <sup>1</sup>H NMR (300 MHz, CDCl<sub>3</sub>): δ 7.96 (dd, *J* = 7.8, 1.5 Hz, 1H), 7.73 (m, 1H), 7.71 (s, 1H), 7.51-7.29 (m, 5H), 7.28 (d, *J* = 39.0 Hz, 1H), 7.03 (t, *J* = 7.6 Hz, 1H), 6.93 (d, *J* = 8.3 Hz, 1H), 3.91 (s, 3H). <sup>19</sup>F NMR (282 MHz, CDCl<sub>3</sub>): δ -128.1 (d, *J* = 39.0 Hz). <sup>13</sup>C NMR (75 MHz, CDCl<sub>3</sub>): δ 157.0 (s, Cq), 156.9 (s, Cq), 152.0 (s, Cq), 146.1 (d, *J* = 254.1 Hz, Cq), 130.6 (d, *J* = 13.7 Hz, CH), 130.2 (d, *J* = 2.0 Hz, CH), 129.1 (s, 2xCH), 129.0 (s, CH), 127.5 (s, Cq), 124.5 (s, 2xCH), 123.8 (s, CH), 121.0 (s, Cq), 120.9 (s, CH), 110.7 (s, CH), 105.3 (d, *J* = 3.4 Hz, CH), 55.7 (s, CH<sub>3</sub>). MS (ESI-TOF): *m/z* 296 [M+H<sup>+</sup>]. HRMS (ESI-TOF): calcd for C<sub>18</sub>H<sub>15</sub>FNO<sub>2</sub> *m/z* 296.1087 [M+H<sup>+</sup>], found: 296.1077.

### c. Reluctant substrates

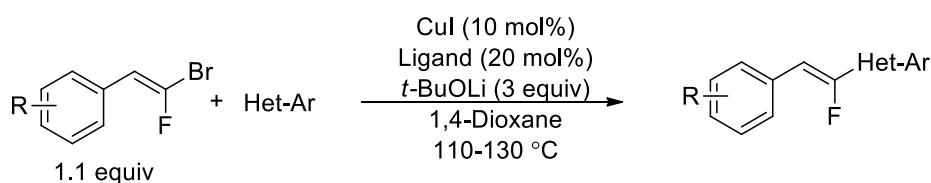

#### Ortho EWG on *gem*-bromofluoroalkene

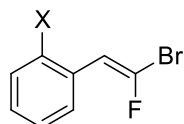

X = F, Cl, CN

Results: degradation of starting material in basic conditions

#### Alkyl *gem*-bromofluoroalkene

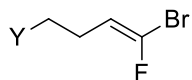

Y = Ph, OTBDPS

Results: no reaction at 110 °C; traces at 130 °C

#### Tetrasubstituted *gem*-bromofluoroalkene

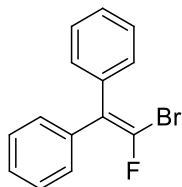

Results: traces of final product

d. Variation of phenyloxazole – Compounds **3Ab** - **3Ce**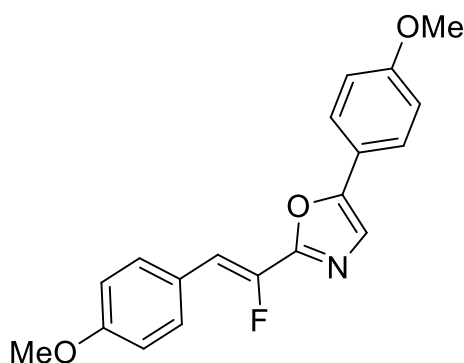

**(Z)-2-(1-Fluoro-2-(4-methoxyphenyl)vinyl)-5-(4-methoxyphenyl)oxazole (3Ab):** (*E*)-1-(2-bromo-2-fluorovinyl)-4-methoxybenzene (0.22 mmol, 51 mg), 5-(4-methoxyphenyl)oxazole (0.20 mmol, 35 mg), CuI (0.02 mmol, 4 mg), dppe (0.04 mmol, 16 mg), *t*-BuOLi (0.60 mmol, 48 mg), 1,4-dioxane (0.8 mL) were reacted according to general procedure. The crude product was purified by silica gel column chromatography (PE/CH<sub>2</sub>Cl<sub>2</sub>, 2/8) affording compound **3Ab** in 74% yield (48 mg) as a colorless solid. mp 93-95 °C (EtOAc/PE). IR: 2926, 2842, 1604, 1535, 1497, 1300, 1250, 1174, 1021, 953, 879, 822 cm<sup>-1</sup>. <sup>1</sup>H NMR (300 MHz, CDCl<sub>3</sub>): δ 7.63 (dd, *J* = 8.7, 1.3 Hz, 4H), 7.31 (s, 1H), 6.96 (m, 4H), 6.70 (d, *J* = 37.9 Hz, 1H), 3.86 (s, 3H), 3.85 (s, 3H). <sup>19</sup>F NMR (282 MHz, CDCl<sub>3</sub>): δ -129.7 (d, *J* = 37.9 Hz). <sup>13</sup>C NMR (75 MHz, CDCl<sub>3</sub>): δ 160.2 (s, Cq), 159.9 (d, *J* = 3.0 Hz, Cq), 152.0 (s, Cq), 145.0 (d, *J* = 250.5 Hz, Cq), 131.2 (d, *J* = 7.5 Hz, 2xCH), 126.0 (s, 2xCH), 124.9 (s, Cq), 124.9 (s, Cq), 122.1 (s, CH), 120.3 (s, Cq), 114.5 (s, 2xCH), 114.4 (s, 2xCH), 110.8 (d, *J* = 5.3 Hz, CH), 55.4 (s, CH<sub>3</sub>), 55.3 (s, CH<sub>3</sub>). MS (ESI-TOF): *m/z* 326 [M+H<sup>+</sup>]. HRMS (ESI-TOF): calcd C<sub>19</sub>H<sub>17</sub>FNO<sub>3</sub> *m/z* 326.1192 [M+H<sup>+</sup>], found: 326.1187.

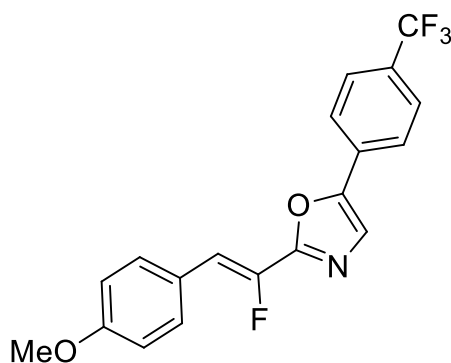

**(Z)-2-(1-Fluoro-2-(4-methoxyphenyl)vinyl)-5-(4-trifluoromethylphenyl)oxazole (3Ac):** (*E*)-1-(2-bromo-2-fluorovinyl)-2-methoxybenzene (0.22 mmol, 51 mg), 5-(4-trifluoromethyl-



phenyl)oxazole (0.20 mmol, 43 mg), CuI (0.02 mmol, 4 mg), dppe (0.04 mmol, 16 mg), *t*-BuOLi (0.60 mmol, 48 mg), 1,4-dioxane (0.8 mL) were reacted according to general procedure. The crude product was purified by silica gel column chromatography (PE/CH<sub>2</sub>Cl<sub>2</sub>, 4/6) affording compound **3Ac** in 83% yield (60 mg) as a yellow solid. mp 145-147 °C (CH<sub>2</sub>Cl<sub>2</sub>/PE). IR: 1700, 1613, 1546, 1413, 1322, 1249, 1165, 1111, 1095, 1069, 954, 871, 842, 824 cm<sup>-1</sup>. <sup>1</sup>H NMR (300 MHz, CDCl<sub>3</sub>): δ 7.74 (d, *J* = 8.4 Hz, 2H), 7.64 (d, *J* = 8.4 Hz, 2H), 7.61 (d, *J* = 8.7 Hz, 2H), 7.50 (s, 1H), 6.91 (d, *J* = 8.7 Hz, 2H), 6.73 (d, *J* = 37.7 Hz, 1H), 3.76 (s, 3H). <sup>19</sup>F NMR (282 MHz, CDCl<sub>3</sub>): δ -62.7 (s, 3F), -130.1 (d, *J* = 37.7 Hz, 1F). <sup>13</sup>C NMR (75 MHz, CDCl<sub>3</sub>): δ 160.3 (d, *J* = 3.3 Hz, Cq), 156.4 (d, *J* = 37.4 Hz, Cq), 150.4 (s, Cq), 144.7 (d, *J* = 252.2 Hz, Cq), 131.5 (d, *J* = 8.0 Hz, 2xCH), 130.8 (s, Cq), 130.4 (s, Cq), 126.2 (q, *J* = 3.8 Hz, 2xCH), 125.5 (d, *J* = 1.5 Hz, CH), 124.6 (d, *J* = 4.0 Hz, Cq), 124.5 (s, 2xCH), 124.0 (q, *J* = 272.0 Hz, Cq), 114.5 (s, 2xCH), 112.2 (d, *J* = 5.2 Hz, CH), 55.5 (s, CH<sub>3</sub>). MS (ESI-TOF): *m/z* 364 [M+H<sup>+</sup>]. HRMS (ESI-TOF): calcd for C<sub>19</sub>H<sub>14</sub>F<sub>4</sub>NO<sub>2</sub> *m/z* 364.0961 [M+H<sup>+</sup>], found: 364.0967.

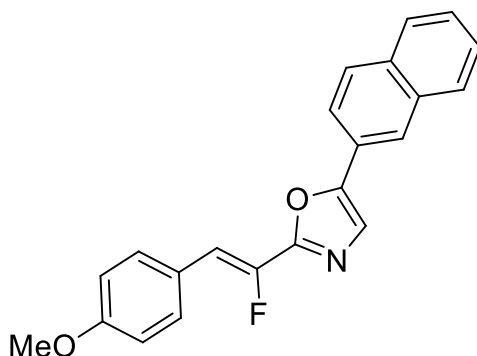

**(Z)-2-(1-Fluoro-2-(4-methoxyphenyl)vinyl)-5-(naphth-2-yl)oxazole (3Ad):** (*E*)-1-(2-bromo-2-fluorovinyl)-4-methoxybenzene (0.22 mmol, 51 mg), 5-(naphthal-2-yl)oxazole (0.20 mmol, 39 mg), CuI (0.02 mmol, 4 mg), dppe (0.04 mmol, 16 mg), *t*-BuOLi (0.60 mmol, 48 mg), 1,4-dioxane (0.8 mL) were reacted according to general procedure. The crude product was purified by silica gel column chromatography (PE/CH<sub>2</sub>Cl<sub>2</sub>, 1/9) affording compound **3Ad** in 80% yield (60 mg) as a yellow solid. mp 135-137 °C (CH<sub>2</sub>Cl<sub>2</sub>/PE). IR: 3133, 1605, 1529, 1504, 1254, 1182, 1114, 1073, 1024, 948, 886, 863, 836, 811 cm<sup>-1</sup>. <sup>1</sup>H NMR (300 MHz, CDCl<sub>3</sub>): δ 8.18 (s, 1H), 7.90 (m, 2H), 7.85 (m, 1H), 7.75 (d, *J* = 8.5 Hz, 1H), 7.67 (d, *J* = 8.6 Hz, 2H), 7.60-7.46 (m, 3H), 6.96 (d, *J* = 8.6 Hz, 2H), 6.80 (d, *J* = 37.8 Hz, 1H), 3.86 (s, 3H). <sup>19</sup>F NMR (282 MHz, CDCl<sub>3</sub>): δ -129.8 (d, *J* = 37.9 Hz). <sup>13</sup>C NMR (75 MHz, CDCl<sub>3</sub>): δ 160.1 (d, *J* = 2.9 Hz, Cq), 156.0 (d, *J* = 37.4 Hz, Cq), 152.0 (s, Cq), 145.0 (d, *J* = 249.8 Hz, Cq), 133.5 (s, Cq),

133.4 (s, Cq), 131.3 (d,  $J = 8.3$  Hz, 2xCH), 129.0 (s, CH), 128.4 (s, CH), 128.0 (s, CH), 127.0 (s, CH), 126.9 (s, CH), 124.9 (s, Cq), 124.8 (s, Cq), 124.3 (s, CH), 123.5 (s, CH), 122.2 (s, CH), 114.5 (s, 2xCH), 111.4 (d,  $J = 5.3$  Hz, CH), 55.4 (s, CH<sub>3</sub>). MS (ESI-TOF):  $m/z$  346 [M+H<sup>+</sup>]. HRMS (ESI-TOF): calcd for C<sub>22</sub>H<sub>17</sub>FNO<sub>2</sub>  $m/z$  346.1243 [M+H<sup>+</sup>], found: 346.1238.

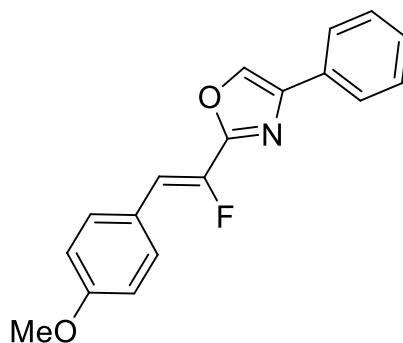

**(Z)-2-(1-Fluoro-2-(4-methoxyphenyl)vinyl)-4-phenyloxazole (3Ae):** (*E*)-1-(2-bromo-2-fluorovinyl)-4-methoxybenzene (0.22 mmol, 51 mg), 4-phenyloxazole (0.20 mmol, 26  $\mu$ L), CuI (0.02 mmol, 4 mg), Phen (0.04 mmol, 7 mg), *t*-BuOLi (0.60 mmol, 48 mg), 1,4-dioxane (0.8 mL) were reacted according to general procedure. The crude product was purified by silica gel column chromatography (PE/CH<sub>2</sub>Cl<sub>2</sub>, 5/5) affording compound **3Ae** in 70% yield (41 mg) as a yellow solid. mp 138-140 °C (CH<sub>2</sub>Cl<sub>2</sub>/PE). IR: 1606, 1545, 1508, 1485, 1453, 1296, 1255, 1179, 1117, 1077, 1032, 940, 866, 811 cm<sup>-1</sup>. <sup>1</sup>H NMR (300 MHz, CDCl<sub>3</sub>):  $\delta$  7.93 (d,  $J = 1.5$  Hz, 1H), 7.80 (d,  $J = 7.2$  Hz, 2H), 7.64 (d,  $J = 8.8$  Hz, 2H), 7.54-7.29 (m, 3H), 6.94 (d,  $J = 8.7$  Hz, 2H), 6.76 (d,  $J = 38.0$  Hz, 1H), 3.84 (s, 3H). <sup>19</sup>F NMR (282 MHz, CDCl<sub>3</sub>):  $\delta$  -129.5 (dd,  $J = 38.0, 1.5$  Hz). <sup>13</sup>C NMR (75 MHz, CDCl<sub>3</sub>):  $\delta$  160.1 (d,  $J = 3.3$  Hz, Cq), 156.4 (d,  $J = 37.3$  Hz, Cq), 145.0 (d,  $J = 252.4$  Hz, Cq), 142.5 (s, Cq), 133.9 (s, CH), 131.4 (d,  $J = 7.9$  Hz, 2xCH), 130.6 (s, Cq), 128.9 (s, 2xCH), 128.6 (s, CH), 125.9 (s, 2xCH), 124.8 (d,  $J = 4.0$  Hz, Cq), 114.4 (s, 2xCH), 111.7 (d,  $J = 5.2$  Hz, CH), 55.4 (s, CH<sub>3</sub>). MS (ESI-TOF):  $m/z$  296 [M+H<sup>+</sup>]. HRMS (ESI-TOF): calcd for C<sub>18</sub>H<sub>15</sub>FNO<sub>2</sub>  $m/z$  296.1088 [M+H<sup>+</sup>], found: 296.1087.

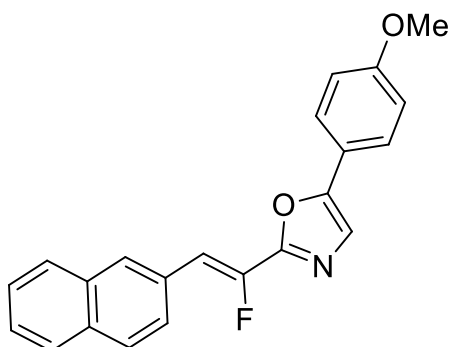

**(Z)-2-(1-Fluoro-2-(naphth-2-yl)vinyl)-5-(4-methoxyphenyl)oxazole (3Cb):** (*E*)-2-(2-bromo-2-fluorovinyl)naphthalene (0.22 mmol, 55 mg), 5-(4-methoxyphenyl)oxazole (0.20 mmol, 35 mg), CuI (0.02 mmol, 4 mg), dppe (0.04 mmol, 16 mg), *t*-BuOLi (0.60 mmol, 48 mg), 1,4-dioxane (0.8 mL) were reacted according to general procedure. The crude product was purified by silica gel column chromatography (PE/CH<sub>2</sub>Cl<sub>2</sub>, 2/8) affording compound **3Cb** in 70% yield (48 mg) as a colorless solid. mp 151-153 °C (EtOAc/PE). IR: 2937, 1616, 1497, 1461, 1425, 1309, 1255, 1177, 1070, 1019, 935, 907, 867, 817 cm<sup>-1</sup>. <sup>1</sup>H NMR (300 MHz, CDCl<sub>3</sub>): δ 8.10 (s, 1H), 7.91-7.77 (m, 4H), 7.64 (d, *J* = 8.8 Hz, 2H), 7.50 (dd, *J* = 6.2, 3.2 Hz, 2H), 7.35 (s, 1H), 6.98 (d, *J* = 8.9 Hz, 2H), 6.90 (d, *J* = 37.9 Hz, 1H), 3.86 (s, 3H). <sup>19</sup>F NMR (282 MHz, CDCl<sub>3</sub>): δ -126.4 (d, *J* = 37.9 Hz). <sup>13</sup>C NMR (75 MHz, CDCl<sub>3</sub>): δ 160.4 (s, Cq), 152.3 (s, Cq), 146.4 (d, *J* = 253.5 Hz, Cq), 133.5 (s, Cq), 133.2 (d, *J* = 2.1 Hz, Cq), 129.8 (s, Cq), 129.8 (s, Cq), 128.5 (s, CH), 128.5 (s, CH), 127.8 (s, CH), 126.9 (s, CH), 126.8 (s, CH), 126.7 (s, CH), 126.6 (s, CH), 126.1 (s, 2xCH), 122.4 (s, CH), 120.3 (s, Cq), 114.6 (s, 2xCH), 111.2 (d, *J* = 5.3 Hz, CH), 55.5 (s CH<sub>3</sub>). MS (ESI-TOF): *m/z* 346 [M+H<sup>+</sup>]. HRMS (ESI-TOF): calcd for C<sub>22</sub>H<sub>17</sub>FNO<sub>2</sub> *m/z* 346.1243 [M+H<sup>+</sup>], found: 346.1256.

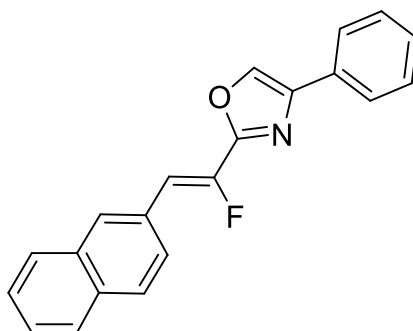

**(Z)-2-(1-Fluoro-2-(naphth-2-yl)vinyl)-4-phenyloxazole (3Ce):** (*E*)-2-(2-bromo-2-fluorovinyl)naphthalene (0.22 mmol, 55 mg), 4-phenyloxazole (0.20 mmol, 26 μL), CuI (0.02 mmol, 4 mg), Phen (0.04 mmol, 7 mg), *t*-BuOLi (0.60 mmol, 48 mg), 1,4-dioxane (0.8 mL) were reacted according to general procedure. The crude product was purified by silica gel

column chromatography (PE/CH<sub>2</sub>Cl<sub>2</sub>, 8/2) affording compound **3Ce** in 99% yield (62 mg) as a yellow solid. mp 181-183 °C (CH<sub>2</sub>Cl<sub>2</sub>/PE). IR: 3055, 1538, 1449, 1272, 1118, 1080, 941, 907, 870, 836, 819 cm<sup>-1</sup>. <sup>1</sup>H NMR (300 MHz, CDCl<sub>3</sub>): δ 8.12 (s, 1H), 7.99 (d, *J* = 1.7 Hz, 1H), 7.92-7.78 (m, 6H), 7.56-7.33 (m, 5H), 6.99 (d, *J* = 37.6 Hz, 1H). <sup>19</sup>F NMR (282 MHz, CDCl<sub>3</sub>): δ -126.2 (dd, *J* = 37.5, 1.4 Hz). <sup>13</sup>C NMR (75 MHz, CDCl<sub>3</sub>): δ 156.2 (d, *J* = 37.5 Hz, Cq), 146.3 (d, *J* = 254.3 Hz, Cq), 142.7 (s, Cq), 134.2 (s, CH), 133.5 (s, Cq), 133.3 (d, *J* = 1.5 Hz, Cq), 130.5 (s, Cq), 129.8 (d, *J* = 8.3 Hz, CH), 129.6 (d, *J* = 3.8 Hz, Cq), 129.0 (s, 2xCH), 128.7 (s, CH), 128.6 (s, CH), 128.6 (s, CH), 127.8 (s, CH), 127.0 (s, CH), 126.8 (d, *J* = 8.3 Hz, CH), 126.7 (s, CH), 125.9 (s, 2xCH), 112.1 (d, *J* = 5.3 Hz, CH). MS (ESI-TOF): *m/z* 316 [M+H<sup>+</sup>]. HRMS (ESI-TOF): calcd for C<sub>21</sub>H<sub>15</sub>FNO *m/z* 316.1138 [M+H<sup>+</sup>], found: 316.1149.

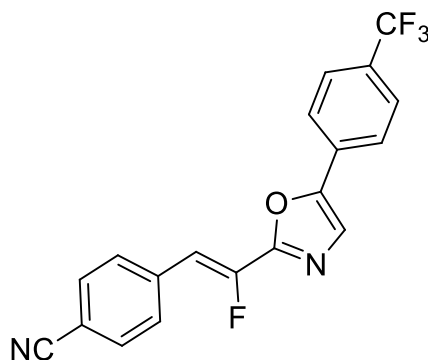

**(Z)-4-(2-Fluoro-2-(5-(4-trifluoromethylphenyl)oxazol-2-yl)vinyl)benzonitrile (3Dc):** (*E*)-4-(2-bromo-2-fluorovinyl)benzonitrile (0.22 mmol, 50 mg), 5-(4-trifluoromethylphenyl)oxazole (0.20 mmol, 43 mg), CuI (0.02 mmol, 4 mg), dppe (0.04 mmol, 16 mg), *t*-BuOLi (0.60 mmol, 48 mg), 1,4-dioxane (0.8 mL) were reacted according to general procedure. The crude product was purified by silica gel column chromatography (PE/CH<sub>2</sub>Cl<sub>2</sub>, 3/7) affording compound **3Dc** in 75% yield (57 mg) as a colorless solid. mp 182-184 °C (CH<sub>2</sub>Cl<sub>2</sub>/PE). IR: 2926, 2226, 1620, 1603, 1533, 1413, 1322, 1164, 1111, 1069, 942, 843, 827 cm<sup>-1</sup>. <sup>1</sup>H NMR (300 MHz, CDCl<sub>3</sub>): δ 7.83-7.67 (m, 9H), 6.84 (d, *J* = 36.0 Hz, 1H). <sup>19</sup>F NMR (282 MHz, CDCl<sub>3</sub>): δ -62.8 (s, 3F), -122.1 (d, *J* = 36.0 Hz, 1F). <sup>13</sup>C NMR (75 MHz, CDCl<sub>3</sub>): δ 155.1 (d, *J* = 36.8 Hz, Cq), 151.3 (s, Cq), 147.5 (d, *J* = 258.8 Hz, Cq), 136.3 (d, *J* = 3.8 Hz, Cq), 132.6 (s, 2xCH), 131.0 (q, *J* = 32.3 Hz, Cq), 130.3 (s, Cq), 130.1 (d, *J* = 8.3 Hz, 2xCH), 126.3 (q, *J* = 3.8 Hz, 2xCH), 125.8 (s, CH), 124.8 (s, 2xCH), 123.9 (q, *J* = 270.8 Hz, Cq), 118.6 (s, Cq), 112.2 (d, *J* = 3.0 Hz, Cq), 110.3 (d, *J* = 4.5 Hz, CH). MS (ESI-TOF): *m/z* 359 [M+H<sup>+</sup>]. HRMS (ESI-TOF): calcd for C<sub>19</sub>H<sub>11</sub>F<sub>4</sub>N<sub>2</sub>O *m/z* 359.0808 [M+H<sup>+</sup>], found: 359.0807.

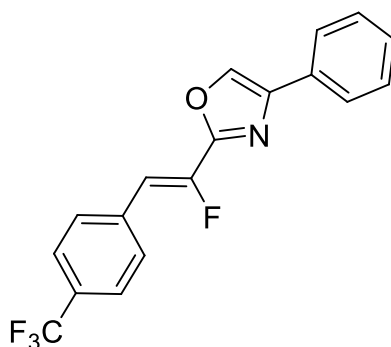

**(Z)-2-(1-Fluoro-2-(4-trifluoromethylphenyl)vinyl)-4-phenyloxazole (3Ee):** (*E*)-1-(2-bromo-2-fluorovinyl)-4-trifluoromethylbenzene (0.22 mmol, 59 mg), 4-phenyloxazole (0.20 mmol, 26  $\mu$ L), CuI (0.02 mmol, 4 mg), Phen (0.04 mmol, 7 mg), *t*-BuOLi (0.60 mmol, 48 mg), 1,4-dioxane (0.8 mL) were reacted according to general procedure. The crude product was purified by silica gel column chromatography (PE/ $\text{CH}_2\text{Cl}_2$ , 4/6) affording compound **3Ee** in 61% yield (40 mg) as a yellow solid. mp 165-167  $^\circ\text{C}$  ( $\text{CH}_2\text{Cl}_2$ /PE). IR: 3106, 1613, 1549, 1415, 1322, 1167, 1106, 1066, 1017, 939, 871, 844, 803  $\text{cm}^{-1}$ .  $^1\text{H}$  NMR (300 MHz,  $\text{CDCl}_3$ ):  $\delta$  8.01 (d,  $J$  = 1.4 Hz, 1H), 7.86-7.77 (m, 4H), 7.69 (d,  $J$  = 8.2 Hz, 2H), 7.50-7.40 (m, 3H), 6.88 (d,  $J$  = 36.6 Hz, 1H).  $^{19}\text{F}$  NMR (282 MHz,  $\text{CDCl}_3$ ):  $\delta$  -62.8 (s, 3F), -123.4 (d,  $J$  = 36.6 Hz, 1F).  $^{13}\text{C}$  NMR (75 MHz,  $\text{CDCl}_3$ ):  $\delta$  155.3 (d,  $J$  = 37.1 Hz, Cq), 147.3 (d,  $J$  = 258.6 Hz, Cq), 146.6 (s, Cq), 142.9 (d,  $J$  = 1.6 Hz, Cq), 142.4 (s, Cq), 130.8 (qd,  $J$  = 32.5, 3.1 Hz, Cq), 129.8 (d,  $J$  = 7.5 Hz, 2xCH), 129.0 (s, 2xCH), 128.8 (s, CH), 125.8 (s, 2xCH), 125.7 (s, CH), 125.6 (q,  $J$  = 3.8 Hz, 2xCH), 123.8 (q,  $J$  = 273.1 Hz, Cq), 110.4 (d,  $J$  = 4.5 Hz, CH). MS (ESI-TOF):  $m/z$  334  $[\text{M}+\text{H}^+]$ . HRMS (ESI-TOF): calcd for  $\text{C}_{18}\text{H}_{12}\text{F}_4\text{NO}$   $m/z$  334.0855  $[\text{M}+\text{H}^+]$ , found: 334.1099.

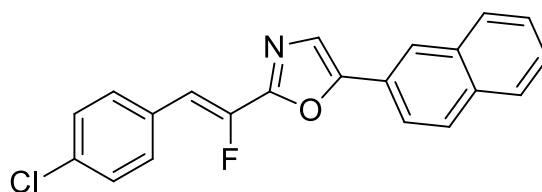

**(Z)-2-(2-(4-Chlorophenyl)-1-fluorovinyl)-5-(naphth-2-yl)oxazole (3Fd):** (*E*)-1-(2-bromo-2-fluorovinyl)-4-chlorobenzene (0.22 mmol, 52 mg), 5-(naphth-2-yl)oxazole (0.20 mmol, 39 mg), CuI (0.02 mmol, 4 mg), dppe (0.04 mmol, 16 mg), *t*-BuOLi (0.60 mmol, 48 mg), 1,4-dioxane (0.8 mL) were reacted according to general procedure. The crude product was purified by silica gel column chromatography (PE/ $\text{CH}_2\text{Cl}_2$ , 2/8) affording compound **3Fd** in 59% yield (42 mg) as a yellow solid. mp 149-151  $^\circ\text{C}$  ( $\text{CH}_2\text{Cl}_2$ /PE). IR: 3055, 1660, 1489, 1333, 1090, 1066, 955, 866, 833, 810  $\text{cm}^{-1}$ .  $^1\text{H}$  NMR (300 MHz,  $\text{CDCl}_3$ ):  $\delta$  8.15 (s, 1H), 7.87 (m, 3H), 7.72

(d,  $J = 8.6$  Hz, 1H), 7.62 (d,  $J = 8.5$  Hz, 2H), 7.53 (m, 3H), 7.38 (d,  $J = 8.5$  Hz, 2H), 6.77 (d,  $J = 37.0$  Hz, 1H).  $^{19}\text{F}$  NMR (282 MHz,  $\text{CDCl}_3$ ):  $\delta$  -125.9 (d,  $J = 37.0$  Hz).  $^{13}\text{C}$  NMR (75 MHz,  $\text{CDCl}_3$ ):  $\delta$  146.3 (d,  $J = 254.8$  Hz, Cq), 136.3 (s, Cq), 134.7 (d,  $J = 3.0$  Hz, Cq), 133.4 (s, CH), 133.4 (d,  $J = 4.2$  Hz, Cq), 130.9 (d,  $J = 7.7$  Hz, CH), 130.6 (s, Cq), 130.5 (s, Cq), 129.2 (s, 2xCH), 129.1 (s, CH), 129.0 (s, CH), 128.4 (s, CH), 128.0 (s, CH), 127.0 (d,  $J = 6.7$  Hz, 2xCH), 124.6 (s, Cq), 123.6 (s, CH), 122.0 (s, CH), 119.3 (s, Cq), 110.4 (d,  $J = 4.1$  Hz, CH). MS (ESI-TOF):  $m/z$  350  $[\text{M}+\text{H}^+]$ . HRMS (ESI-TOF): calcd for  $\text{C}_{21}\text{H}_{14}^{35}\text{ClFNO}$   $m/z$  350.0748  $[\text{M}+\text{H}^+]$ , found: 350.0736.

e. Variation of heteroaryle - Compounds **4Aa** - **7G**

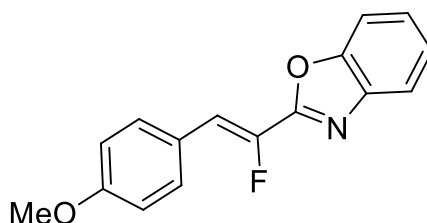

**(Z)-2-(1-Fluoro-2-(4-methoxyphenyl)vinyl)benzo[d]oxazole (4Aa):** (*E*)-1-(2-bromo-2-fluorovinyl)-4-methoxybenzene (0.22 mmol, 51 mg), benzo[d]oxazole (0.20 mmol, 24 mg), CuI (0.02 mmol, 4 mg), dppe (0.04 mmol, 16 mg), *t*-BuOLi (0.60 mmol, 48 mg), 1,4-dioxane (0.8 mL) were reacted according to general procedure. The crude product was purified by silica gel column chromatography (PE/ $\text{CH}_2\text{Cl}_2$ , 5/5) affording compound **4Aa** in 82% yield (44 mg) as a yellow solid. Exhibited spectral data were identical to previous report: C. Schneider, D. Masi, S. Couve-Bonnaire, X. Pannecoucke and C. Hoarau, *Angew. Chem. Int. Ed.*, 2013, **52**, 3246.

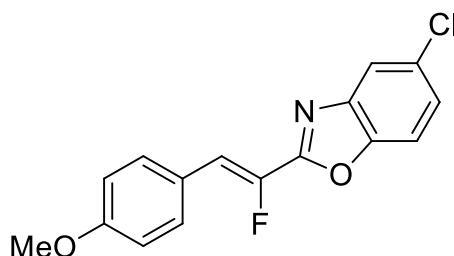

**(Z)-5-Chloro-2-(1-fluoro-2-(4-methoxyphenyl)vinyl)benzo[d]oxazole (4Ab):** (*E*)-1-(2-bromo-2-fluorovinyl)-4-methoxybenzene (0.22 mmol, 51 mg), 5-chlorobenzo[d]oxazole (0.20 mmol, 31 mg), CuI (0.02 mmol, 4 mg), dppe (0.04 mmol, 16 mg), *t*-BuOLi (0.60 mmol, 48

mg), 1,4-dioxane (0.8 mL) were reacted according to general procedure. The crude product was purified by silica gel column chromatography (PE/CH<sub>2</sub>Cl<sub>2</sub>, 8/2) affording compound **4Ab** in 70% yield (42 mg) as a colorless solid. mp 159-161 °C (CH<sub>2</sub>Cl<sub>2</sub>/PE). IR: 3093, 2959, 2216, 1660, 1605, 1542, 1449, 1259, 1179, 1071, 1021, 937, 841, 821, 803 cm<sup>-1</sup>. <sup>1</sup>H NMR (300 MHz, CDCl<sub>3</sub>): δ 7.72 (d, *J* = 1.4 Hz, 1H), 7.66 (d, *J* = 8.7 Hz, 2H), 7.46 (d, *J* = 8.6 Hz, 1H), 7.33 (dd, *J* = 8.6, 1.4 Hz, 1H), 6.95 (d, *J* = 37.3 Hz, 1H), 6.94 (d, *J* = 8.6 Hz, 2H), 3.85 (s, 3H). <sup>19</sup>F NMR (282 MHz, CDCl<sub>3</sub>): δ -130.3 (d, *J* = 37.3 Hz). <sup>13</sup>C NMR (75 MHz, CDCl<sub>3</sub>): δ 160.7 (d, *J* = 3.3 Hz, Cq), 158.7 (d, *J* = 36.5 Hz, Cq), 149.2 (s, Cq), 144.2 (d, *J* = 252.3 Hz, Cq), 142.9 (s, Cq), 131.9 (d, *J* = 8.1 Hz, 2xCH), 130.7 (s, Cq), 126.1 (s, CH), 124.3 (d, *J* = 4.1 Hz, Cq), 120.4 (s, CH), 115.3 (d, *J* = 4.6 Hz, CH), 114.6 (s, 2xCH), 111.4 (s, CH), 55.5 (s, CH<sub>3</sub>). MS (ESI-TOF): *m/z* 304 [M+H<sup>+</sup>]. HRMS (ESI-TOF): calcd for C<sub>16</sub>H<sub>12</sub><sup>35</sup>ClFNO<sub>2</sub> *m/z* 304.0541 [M+H<sup>+</sup>], found: 304.0539.

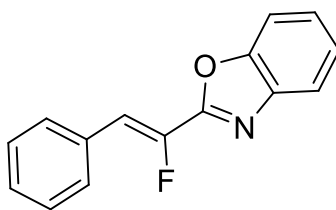

**(Z)-2-(1-Fluoro-2-phenylvinyl)benzo[d]oxazole (4Ba):** (*E*)-(2-bromo-2-fluorovinyl)benzene (0.22 mmol, 44 mg), benzo[d]oxazole (0.20 mmol, 24 mg), CuI (0.02 mmol, 4 mg), dppe (0.04 mmol, 16 mg), *t*-BuOLi (0.60 mmol, 48 mg), 1,4-dioxane (0.8 mL) were reacted according to general procedure. The crude product was purified by silica gel column chromatography (PE/CH<sub>2</sub>Cl<sub>2</sub>, 5/5) affording compound **4Ba** in 53% yield (25 mg) as a colorless solid. mp 93-95 °C (CH<sub>2</sub>Cl<sub>2</sub>/PE). IR: 2920, 2223, 1548, 1449, 1341, 1234, 1110, 1066, 935, 838 cm<sup>-1</sup>. <sup>1</sup>H NMR (300 MHz, CDCl<sub>3</sub>): δ 7.81-7.77 (m, 1H), 7.73 (d, *J* = 7.4 Hz, 2H), 7.61-7.55 (m, 1H), 7.49-7.33 (m, 5H), 7.02 (d, *J* = 37.1 Hz, 1H). <sup>19</sup>F NMR (282 MHz, CDCl<sub>3</sub>): δ -126.4 (d, *J* = 37.1 Hz). <sup>13</sup>C NMR (75 MHz, CDCl<sub>3</sub>): δ 156.9 (d, *J* = 36.6 Hz, Cq), 150.6 (s, Cq), 145.8 (d, *J* = 255.5 Hz, Cq), 141.5 (s, Cq), 131.6 (d, *J* = 4.1 Hz, Cq), 130.0 (d, *J* = 7.9 Hz, 2xCH), 129.4 (d, *J* = 2.7 Hz, CH), 128.9 (s, 2xCH), 126.1 (s, CH), 125.1 (s, CH), 120.6 (s, CH), 114.5 (d, *J* = 4.6 Hz, CH), 110.7 (s, CH). MS (ESI-TOF): *m/z* 240 [M+H<sup>+</sup>]. HRMS (ESI-TOF): calcd for C<sub>15</sub>H<sub>11</sub>FNO *m/z* 240.0825 [M+H<sup>+</sup>], found: 240.0823.

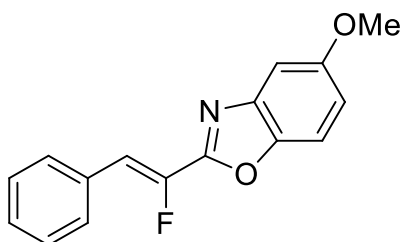

**(Z)-2-(1-Fluoro-2-phenylvinyl)-5-methoxybenzo[d]oxazole (4Bc):** (*E*)-1-(2-bromo-2-fluorovinyl)benzene (0.22 mmol, 45 mg), 5-methoxybenzo[d]oxazole (0.20 mmol, 30 mg), CuI (0.02 mmol, 4 mg), dppe (0.04 mmol, 16 mg), *t*-BuOLi (0.60 mmol, 48 mg), 1,4-dioxane (0.8 mL) were reacted according to general procedure. The crude product was purified by silica gel column chromatography (PE/CH<sub>2</sub>Cl<sub>2</sub>, 5/5 to 3/7) affording compound **4Bc** in 99% yield (55 mg) as a colorless solid. mp 109-111 °C (CH<sub>2</sub>Cl<sub>2</sub>/PE). IR: 2919, 2220, 1607, 1545, 1484, 1435, 1339, 1273, 1113, 1073, 833, 812 cm<sup>-1</sup>. <sup>1</sup>H NMR (300 MHz, CDCl<sub>3</sub>): δ 7.74 (d, *J* = 7.5 Hz, 2H), 7.51-7.37 (m, 4H), 7.27 (m, 1H), 7.01 (d, *J* = 8.9 Hz, 1H), 7.00 (d, *J* = 37.1 Hz, 1H), 3.89 (s, 3H). <sup>19</sup>F NMR (282 MHz, CDCl<sub>3</sub>): δ -126.5 (d, *J* = 37.1 Hz). <sup>13</sup>C NMR (75 MHz, CDCl<sub>3</sub>): δ 157.9 (s, Cq), 157.7 (d, *J* = 36.6 Hz, Cq), 146.0 (d, *J* = 255.4 Hz, Cq), 145.4 (s, Cq), 142.5 (s, Cq), 131.8 (d, *J* = 4.3 Hz, Cq), 130.1 (d, *J* = 7.9 Hz, 2xCH), 129.4 (d, *J* = 2.3 Hz, CH), 129.0 (s, 2xCH), 115.0 (s, CH), 114.3 (d, *J* = 4.6 Hz, CH), 111.0 (s, CH), 103.2 (s, CH), 56.1 (s, CH<sub>3</sub>). MS (ESI-TOF): *m/z* 270 [M+H<sup>+</sup>]. HRMS (ESI-TOF): calcd for C<sub>16</sub>H<sub>13</sub>FO<sub>2</sub> *m/z* 270.0930 [M+H<sup>+</sup>], found: 270.0930.

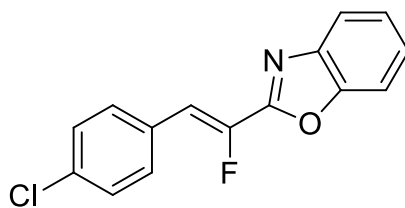

**(Z)-2-(2-(4-chlorophenyl)-1-fluorovinyl)benzo[d]oxazole (4Fa):** (*E*)-1-(2-bromo-2-fluorovinyl)-4-chlorobenzene (0.22 mmol, 52 mg), benzo[d]oxazole (0.20 mmol, 24 mg), CuI (0.02 mmol, 4 mg), dppe (0.04 mmol, 16 mg), *t*-BuOLi (0.60 mmol, 48 mg), 1,4-dioxane (0.8 mL) were reacted according to general procedure. The crude product was purified by silica gel column chromatography (PE/CH<sub>2</sub>Cl<sub>2</sub>, 5/5) affording compound **4Fa** in 74% yield (40 mg) as a yellow solid. mp 143-145 °C (CH<sub>2</sub>Cl<sub>2</sub>/PE). IR: 3060, 2219, 1659, 1544, 1450, 1335, 1242, 1098, 1064, 937, 866, 839, 809 cm<sup>-1</sup>. <sup>1</sup>H NMR (300 MHz, CDCl<sub>3</sub>): δ 7.85-7.75 (m, 1H), 7.69-7.55 (m, 3H), 7.48-7.37 (m, 4H), 6.98 (d, *J* = 36.7 Hz, 1H). <sup>19</sup>F NMR (282 MHz, CDCl<sub>3</sub>):



$\delta$  -125.7 (d,  $J$  = 36.5 Hz).  $^{13}\text{C}$  NMR (75 MHz,  $\text{CDCl}_3$ ):  $\delta$  150.7 (s, Cq), 146.2 (d,  $J$  = 255.0 Hz, Cq), 141.6 (s, Cq), 135.4 (s, Cq), 133.8 (s, Cq), 131.2 (d,  $J$  = 8.3 Hz, 2xCH), 130.2 (s, Cq), 129.3 (s, 2xCH), 126.3 (s, CH), 125.3 (s, CH), 120.8 (s, CH), 113.4 (d,  $J$  = 4.5 Hz, CH), 110.9 (s, CH). MS (ESI-TOF):  $m/z$  274  $[\text{M}+\text{H}^+]$ . HRMS (ESI-TOF): calcd for  $\text{C}_{15}\text{H}_{10}^{35}\text{ClFNO}$   $m/z$  274.0435  $[\text{M}+\text{H}^+]$ , found: 274.0439.

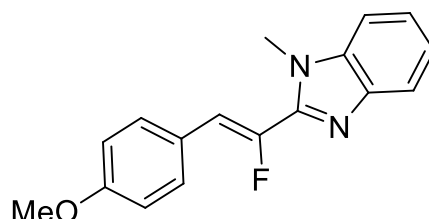

**(Z)-2-(1-Fluoro-2-(4-methoxyphenyl)vinyl)-1-methyl-1H-benzo[d]imidazole (5A):** (*E*)-1-(2-bromo-2-fluorovinyl)-4-methoxybenzene (0.22 mmol, 51 mg), 1-methyl-1H-benzo[d]imidazole (0.20 mmol, 26 mg), CuI (0.02 mmol, 4 mg), *trans*-*N,N'*-dimethyl-1,2-cyclohexanediamine (0.04 mmol, 7  $\mu\text{L}$ ), *t*-BuOLi (0.60 mmol, 48 mg), 1,4-dioxane (0.8 mL) were reacted according to general procedure. The crude product was purified by silica gel column chromatography (PE/ $\text{CH}_2\text{Cl}_2$ , 5/5) affording compound **5A** in 54% yield (31 mg) as an orange solid. mp 125-127  $^\circ\text{C}$  ( $\text{CH}_2\text{Cl}_2$ /PE). IR: 3045, 2931, 1605, 1512, 1393, 1297, 1253, 1177, 1027, 870, 825  $\text{cm}^{-1}$ .  $^1\text{H}$  NMR (300 MHz,  $\text{CDCl}_3$ ):  $\delta$  7.79-7.74 (m, 1H), 7.65 (d,  $J$  = 8.8 Hz, 2H), 7.40-7.29 (m, 3H), 6.97 (d,  $J$  = 39.9 Hz, 1H), 6.94 (d,  $J$  = 8.8 Hz, 2H), 3.97 (d,  $J$  = 3.4 Hz, 3H), 3.84 (s, 3H).  $^{19}\text{F}$  NMR (282 MHz,  $\text{CDCl}_3$ ):  $\delta$  - 122.6 (dq,  $J$  = 39.9, 3.4 Hz).  $^{13}\text{C}$  NMR (75 MHz,  $\text{CDCl}_3$ ):  $\delta$  159.8 (d,  $J$  = 3.3 Hz, Cq), 148.7 (d,  $J$  = 252.6 Hz, Cq), 146.3 (d,  $J$  = 32.4 Hz, Cq), 142.8 (d,  $J$  = 2.3 Hz, Cq), 136.7 (s, Cq), 131.2 (d,  $J$  = 8.0 Hz, 2xCH), 125.3 (d,  $J$  = 3.6 Hz, Cq), 123.5 (s, CH), 123.0 (s, CH), 119.9 (s, CH), 114.3 (s, 2xCH), 112.9 (d,  $J$  = 6.5 Hz, CH), 109.6 (s, CH), 55.4 (s,  $\text{OCH}_3$ ), 31.9 (d,  $J$  = 10.8 Hz,  $\text{NCH}_3$ ). MS (ESI-TOF):  $m/z$  283  $[\text{M}+\text{H}^+]$ . HRMS (ESI-TOF): calcd for  $\text{C}_{17}\text{H}_{16}\text{FN}_2\text{O}$   $m/z$  283.1247  $[\text{M}+\text{H}^+]$ , found: 283.1241.

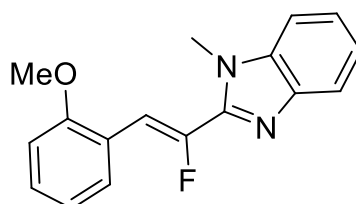

**(Z)-2-(1-Fluoro-2-(2-methoxyphenyl)vinyl)-1-methyl-1H-benzo[d]imidazole (5H):** (*E*)-1-(2-bromo-2-fluorovinyl)-2-methoxybenzene (0.22 mmol, 51 mg), 1-methyl-1H-benzo[d]imidazole (0.20 mmol, 26 mg), CuI (0.02 mmol, 4 mg), *trans*-*N,N'*-dimethyl-1,2-

cyclohexanediamine (0.04 mmol, 7  $\mu$ L), *t*-BuOLi (0.60 mmol, 48 mg), 1,4-dioxane (0.8 mL) were reacted according to general procedure. The crude product was purified by silica gel column chromatography (PE/CH<sub>2</sub>Cl<sub>2</sub>, 5/5) affording compound **5H** in 55% yield (31 mg) as a brown solid. mp 101-103 °C (CH<sub>2</sub>Cl<sub>2</sub>/PE). IR: 3036, 2933, 1597, 1462, 1387, 1245, 1053, 1025, 856 cm<sup>-1</sup>. <sup>1</sup>H NMR (300 MHz, CDCl<sub>3</sub>):  $\delta$  7.91 (d, *J* = 7.4 Hz, 1H), 7.77 (d, *J* = 5.7 Hz, 1H), 7.38 (d, *J* = 40.6 Hz, 1H), 7.30-7.16 (m, 4H), 6.97 (t, *J* = 7.5 Hz, 1H), 6.88 (d, *J* = 8.2 Hz, 1H), 3.93 (d, *J* = 2.3 Hz, 3H), 3.83 (s, 3H). <sup>19</sup>F NMR (282 MHz, CDCl<sub>3</sub>):  $\delta$  -119.9 (d, *J* = 40.6 Hz). <sup>13</sup>C NMR (75 MHz, CDCl<sub>3</sub>):  $\delta$  157.2 (s, Cq), 149.7 (d, *J* = 254.8 Hz, Cq), 142.9 (s, Cq), 142.9 (s, Cq), 130.3 (d, *J* = 13.4 Hz, CH), 129.9 (d, *J* = 1.8 Hz, CH), 123.6 (s, CH), 123.0 (s, CH), 121.43 (s, Cq), 121.38 (s, Cq), 120.7 (s, CH), 120.2 (s, CH), 110.7 (s, CH), 109.7 (s, CH), 107.3 (d, *J* = 4.8 Hz, CH), 55.6 (s, OCH<sub>3</sub>), 31.9 (d, *J* = 9.6 Hz, NCH<sub>3</sub>). MS (ESI-TOF): *m/z* 283 [M+H<sup>+</sup>]. HRMS (ESI-TOF): calcd for C<sub>17</sub>H<sub>16</sub>FN<sub>2</sub>O *m/z* 283.1247 [M+H<sup>+</sup>], found: 283.1252.

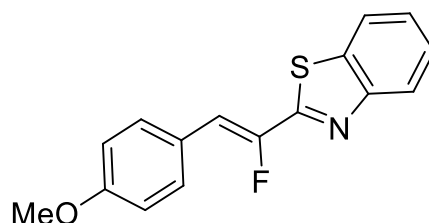

**(Z)-2-(1-Fluoro-2-(4-methoxyphenyl)vinyl)benzo[d]thiazole (6A):** (*E*)-1-(2-bromo-2-fluorovinyl)-4-methoxybenzene (0.22 mmol, 51 mg), benzo[d]thiazole (0.20 mmol, 22  $\mu$ L), CuI (0.02 mmol, 4 mg), phenanthroline (0.04 mmol, 7 mg), *t*-BuOLi (0.60 mmol, 48 mg), 1,4-dioxane (0.8 mL) were reacted according to general procedure. The crude product was purified by silica gel column chromatography (PE/CH<sub>2</sub>Cl<sub>2</sub>, 5/5) affording compound **6A** in 91% yield (52 mg) as a yellow solid. Exhibited spectral data were identical to previous report: C. Schneider, D. Masi, S. Couve-Bonnaire, X. Pannecoucke and C. Hoarau, *Angew. Chem. Int. Ed.*, 2013, **52**, 3246.

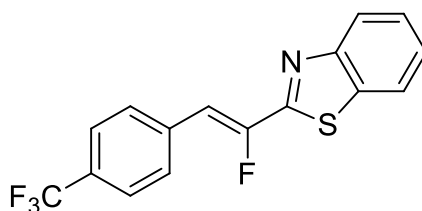

**(Z)-2-(1-Fluoro-2-(4-trifluoromethylphenyl)vinyl)benzo[d]thiazole (6E):** (*E*)-1-(2-bromo-2-fluorovinyl)-4-trifluoromethylbenzene (0.22 mmol, 59 mg), benzo[d]thiazole (0.20 mmol, 22

$\mu\text{L}$ ), CuI (0.02 mmol, 4 mg), phenanthroline (0.04 mmol, 7 mg), *t*-BuOLi (0.60 mmol, 48 mg), 1,4-dioxane (0.8 mL) were reacted according to general procedure. The crude product was purified by silica gel column chromatography (PE/ $\text{CH}_2\text{Cl}_2$ , 5/5) affording compound **6E** in 41% yield (26 mg) as a yellow solid. mp 123-125 °C ( $\text{CH}_2\text{Cl}_2/\text{PE}$ ). IR: 3063, 1699, 1614, 1413, 1321, 1253, 1169, 1106, 1066, 997, 865, 831  $\text{cm}^{-1}$ .  $^1\text{H}$  NMR (300 MHz,  $\text{CDCl}_3$ ):  $\delta$  8.09 (d,  $J$  = 8.2 Hz, 1H), 7.95 (d,  $J$  = 8.0 Hz, 1H), 7.82 (d,  $J$  = 8.3 Hz, 2H), 7.67 (d,  $J$  = 8.3 Hz, 2H), 7.56 (m, 1H), 7.45 (m, 1H), 7.12 (d,  $J$  = 37.8 Hz, 1H).  $^{19}\text{F}$  NMR (282 MHz,  $\text{CDCl}_3$ ):  $\delta$  -62.8 (s, 3F), -111.6 (d,  $J$  = 37.8 Hz, 1F).  $^{13}\text{C}$  NMR (75 MHz,  $\text{CDCl}_3$ ):  $\delta$  160.4 (d,  $J$  = 39.0 Hz, Cq), 153.7 (d,  $J$  = 2.2 Hz, Cq), 152.9 (d,  $J$  = 256.0 Hz, Cq), 135.9-135.4 (m, Cq), 135.2 (s, Cq), 130.4 (qd,  $J$  = 32.7, 2.8 Hz, Cq), 130.1 (d,  $J$  = 8.1 Hz, 2xCH), 127.1 (s, CH), 126.1 (s, CH), 125.9 (q,  $J$  = 3.6 Hz, 2xCH), 124.0 (q,  $J$  = 270.8 Hz, Cq), 123.7 (s, CH), 122.0 (s, CH), 109.1 (d,  $J$  = 6.0 Hz, CH). MS (ESI-TOF):  $m/z$  324 [ $\text{M}+\text{H}^+$ ]. HRMS (ESI-TOF): calcd for  $\text{C}_{16}\text{H}_{10}\text{F}_4\text{NS}$   $m/z$  324.0470 [ $\text{M}+\text{H}^+$ ], found: 324.0467.

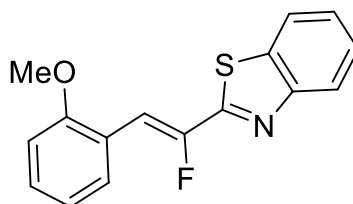

**(Z)-2-(1-Fluoro-2-(2-methoxyphenyl)vinyl)benzo[d]thiazole (6H):** (*E*)-1-(2-bromo-2-fluorovinyl)-2-methoxybenzene (0.22 mmol, 51 mg), benzo[d]thiazole (0.20 mmol, 22  $\mu\text{L}$ ), CuI (0.02 mmol, 4 mg), phenanthroline (0.04 mmol, 7 mg), *t*-BuOLi (0.60 mmol, 48 mg), 1,4-dioxane (0.8 mL) were reacted according to general procedure. The crude product was purified by silica gel column chromatography (PE/ $\text{CH}_2\text{Cl}_2$ , 5/5) affording compound **6H** in 54% yield (31 mg) as a yellow solid. mp 99-101 °C ( $\text{CH}_2\text{Cl}_2/\text{PE}$ ). IR: 2922, 1727, 1597, 1576, 1481, 1456, 1291, 1244, 1231, 1183, 1053, 1027, 935, 877  $\text{cm}^{-1}$ .  $^1\text{H}$  NMR (300 MHz,  $\text{CDCl}_3$ ):  $\delta$  8.05 (d,  $J$  = 8.4 Hz, 1H), 7.96 (d,  $J$  = 7.8 Hz, 1H), 7.87 (d,  $J$  = 7.2 Hz, 1H), 7.50 (dd,  $J$  = 39.0, 1.8 Hz, 1H), 7.48 (t,  $J$  = 7.5 Hz, 1H), 7.37 (t,  $J$  = 7.2 Hz, 1H), 7.29 (t,  $J$  = 7.8 Hz, 1H), 7.00 (t,  $J$  = 7.5 Hz, 1H), 6.89 (d,  $J$  = 9.0 Hz, 1H), 3.87 (d,  $J$  = 2.1 Hz, 3H).  $^{19}\text{F}$  NMR (282 MHz,  $\text{CDCl}_3$ ):  $\delta$  -115.6 (d,  $J$  = 39.0 Hz).  $^{13}\text{C}$  NMR (75 MHz,  $\text{CDCl}_3$ ):  $\delta$  161.4 (d,  $J$  = 37.5 Hz, Cq), 157.3 (d,  $J$  = 15.0 Hz, Cq), 153.7 (d,  $J$  = 15.0 Hz, Cq), 151.5 (d,  $J$  = 251.5 Hz, Cq), 134.8 (s, Cq), 130.6 (d,  $J$  = 15.0 Hz, CH), 130.2 (d,  $J$  = 4.5 Hz, CH), 126.6 (s, CH), 125.5 (s, CH), 123.4 (s, CH), 121.7 (s, CH), 120.9 (d,  $J$  = 4.5 Hz, Cq), 120.8 (s, CH), 110.7 (s, CH), 105.0 (d,  $J$  = 4.5 Hz,

CH), 55.7 (s, CH<sub>3</sub>). MS (ESI-TOF):  $m/z$  286 [M+H<sup>+</sup>]. HRMS (ESI-TOF): calcd for C<sub>16</sub>H<sub>13</sub>FNOS  $m/z$  286.0702 [M+H<sup>+</sup>], found: 286.0697.

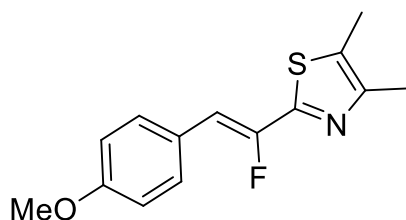

**(Z)-2-(1-Fluoro-2-(4-methoxyphenyl)vinyl)-4,5-dimethylthiazole (7A):** (*E*)-1-(2-bromo-2-fluorovinyl)-4-methoxybenzene (0.22 mmol, 51 mg), 4,5-dimethylthiazole (0.20 mmol, 21  $\mu$ L), CuI (0.04 mmol, 8 mg), phenanthroline (0.08 mmol, 14 mg), *t*-BuOLi (0.60 mmol, 48 mg), 1,4-dioxane (0.8 mL) were reacted according to general procedure. The crude product was purified by silica gel column chromatography (PE/CH<sub>2</sub>Cl<sub>2</sub>, 5/5) affording compound **7A** in 72% yield (37 mg) as a yellow solid. Exhibited spectral data were identical to previous report: K. Rousée, C. Schneider, S. Couve-Bonnaire, X. Pannecoucke, V. Levacher and C. Hoarau, *Chem. Eur. J.*, 2014, **10**, 15000.

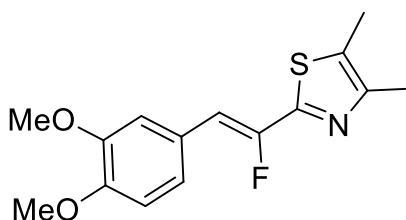

**(Z)-2-(1-Fluoro-2-(3,4-dimethoxyphenyl)vinyl)-4,5-dimethylthiazole (7G):** (*E*)-1-(2-bromo-2-fluorovinyl)-3,4-dimethoxybenzene (0.22 mmol, 57 mg), 4,5-dimethylthiazole (0.20 mmol, 21  $\mu$ L), CuI (0.04 mmol, 8 mg), phenanthroline (0.08 mmol, 14 mg), *t*-BuOLi (0.60 mmol, 48 mg), 1,4-dioxane (0.8 mL) were reacted according to general procedure. The crude product was purified by silica gel column chromatography (PE/CH<sub>2</sub>Cl<sub>2</sub>, 5/5) affording compound **7G** in 86% yield (42 mg) as a yellow solid. mp 106-108 °C (CH<sub>2</sub>Cl<sub>2</sub>/PE). IR: 2917, 1512, 1439, 1268, 1242, 1156, 1143, 1024, 848, 803 cm<sup>-1</sup>. <sup>1</sup>H NMR (300 MHz, CDCl<sub>3</sub>):  $\delta$  7.24 (s, 1H), 7.17 (dd, *J* = 8.4, 1.7 Hz, 1H), 6.85 (d, *J* = 8.4 Hz, 1H), 6.68 (d, *J* = 39.6 Hz, 1H), 3.90 (s, 3H), 3.89 (s, 3H), 2.38 (s, 3H), 2.36 (s, 3H). <sup>19</sup>F NMR (282 MHz, CDCl<sub>3</sub>):  $\delta$  -117.0 (d, *J* = 39.6 Hz). <sup>13</sup>C NMR (75 MHz, CDCl<sub>3</sub>):  $\delta$  156.4 (d, *J* = 39.3 Hz, Cq), 150.9 (d, *J* = 248.6 Hz,

Cq), 150.0 (d,  $J = 2.2$  Hz, Cq), 149.2 (d,  $J = 3.2$  Hz, Cq), 148.9 (s, Cq), 127.6 (s, Cq), 125.7 (d,  $J = 3.7$  Hz, Cq), 123.0 (d,  $J = 7.0$  Hz, CH), 112.1 (d,  $J = 9.2$  Hz, CH), 111.2 (s, CH), 106.6 (d,  $J = 6.8$  Hz, CH), 56.0 (s, CH<sub>3</sub>), 55.9 (s, CH<sub>3</sub>), 15.0 (s, CH<sub>3</sub>), 11.6 (s, CH<sub>3</sub>). MS (ESI-TOF):  $m/z$  294 [M+H<sup>+</sup>]. HRMS (ESI-TOF): calcd for C<sub>15</sub>H<sub>17</sub>FNO<sub>2</sub>S  $m/z$  294.0964 [M+H<sup>+</sup>], found: 294.0962.

5.  $^1\text{H}$ ,  $^{13}\text{C}$  and  $^{19}\text{F}$  NMR spectra*Gem*-bromofluoroalkene **1B**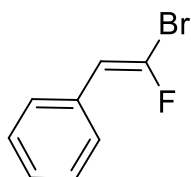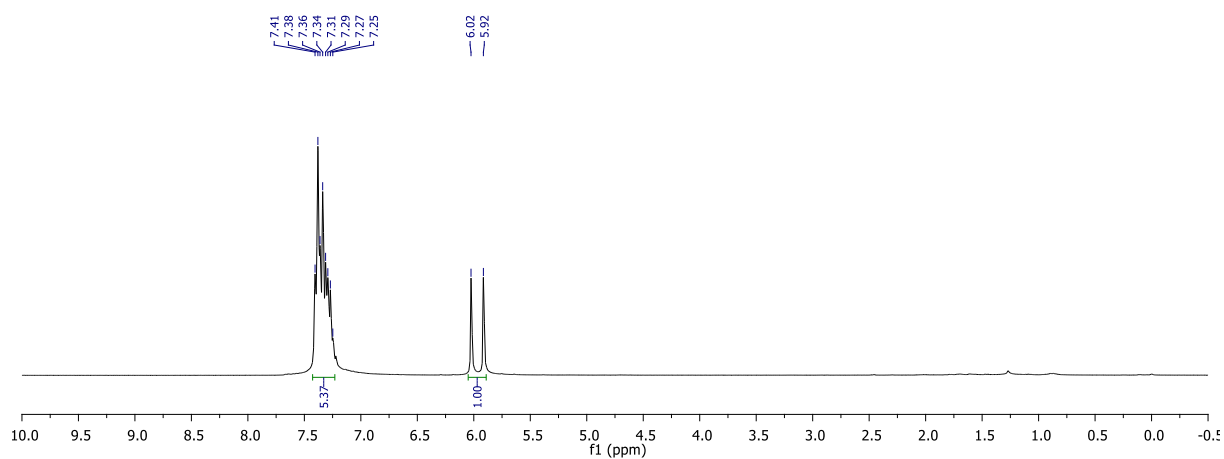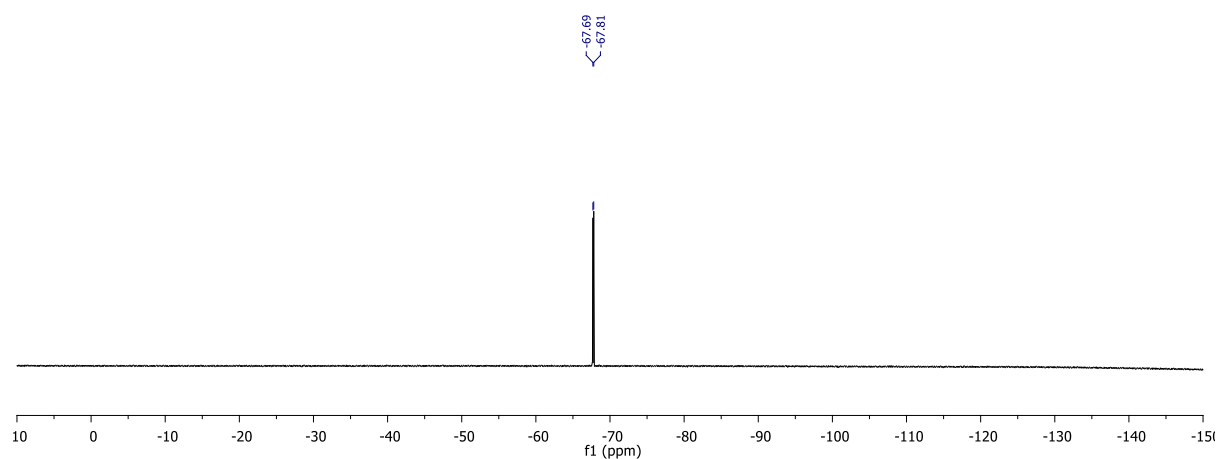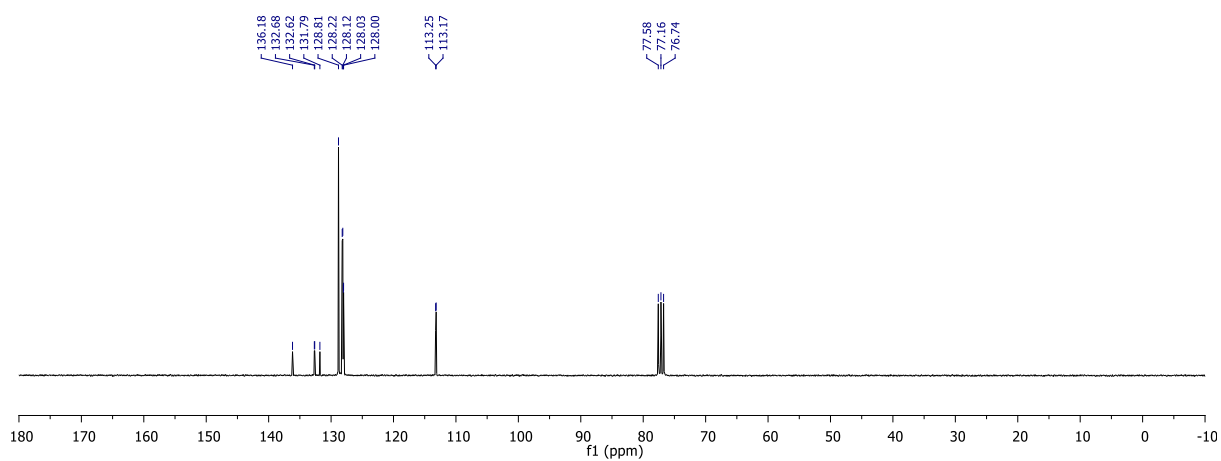

*Gem*-bromofluoroalkene **1F**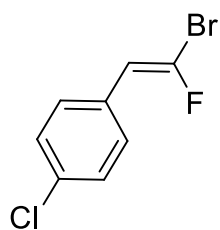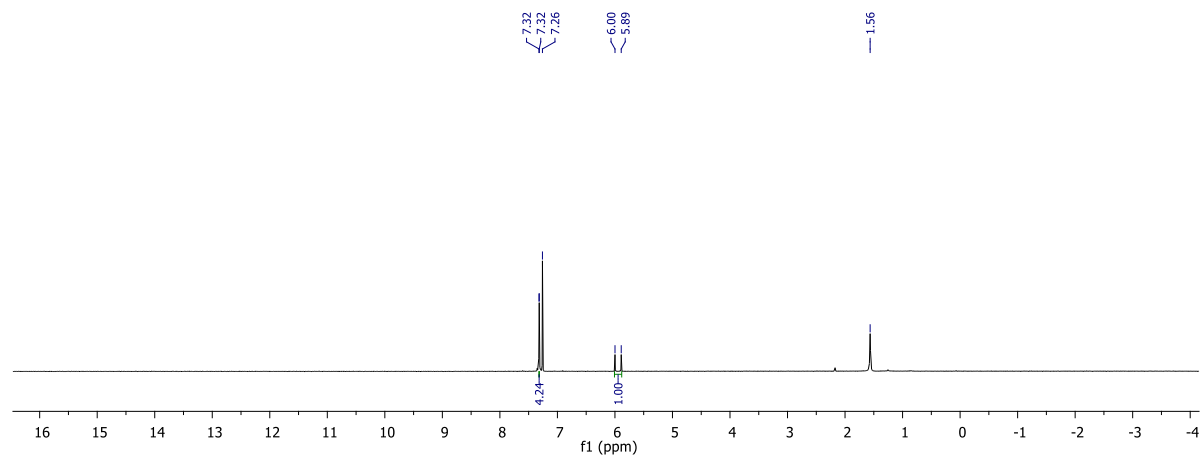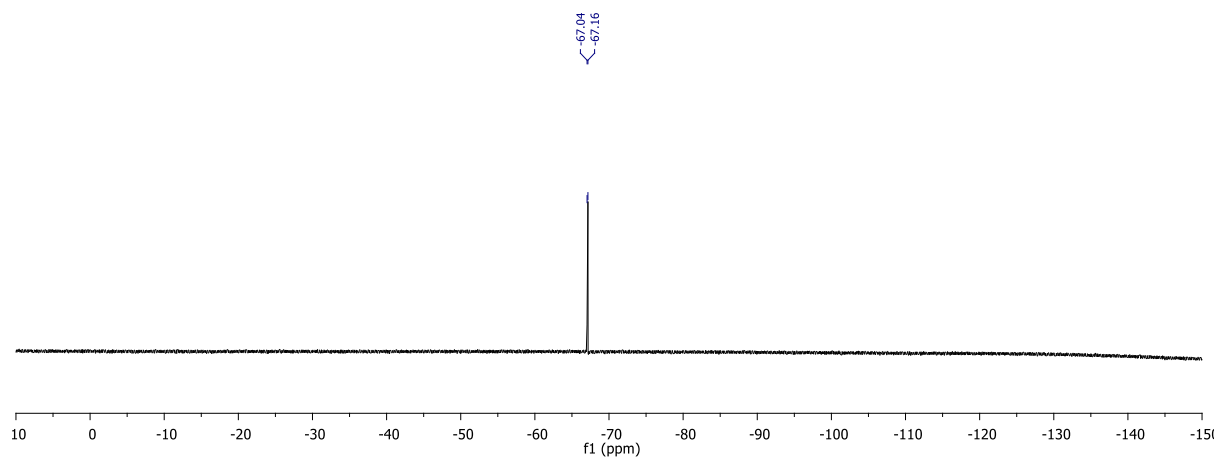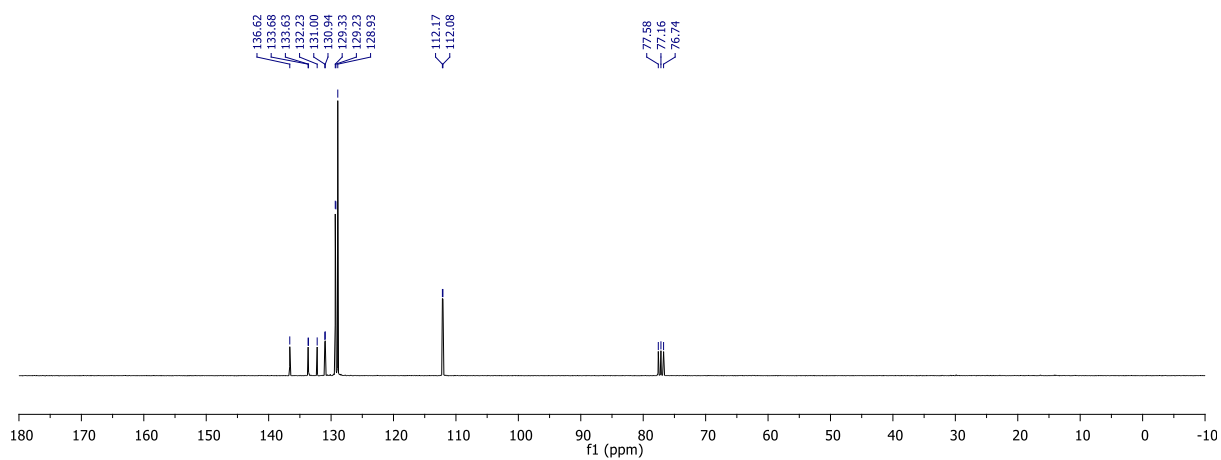

*Gem*-bromofluoroalkene **1H**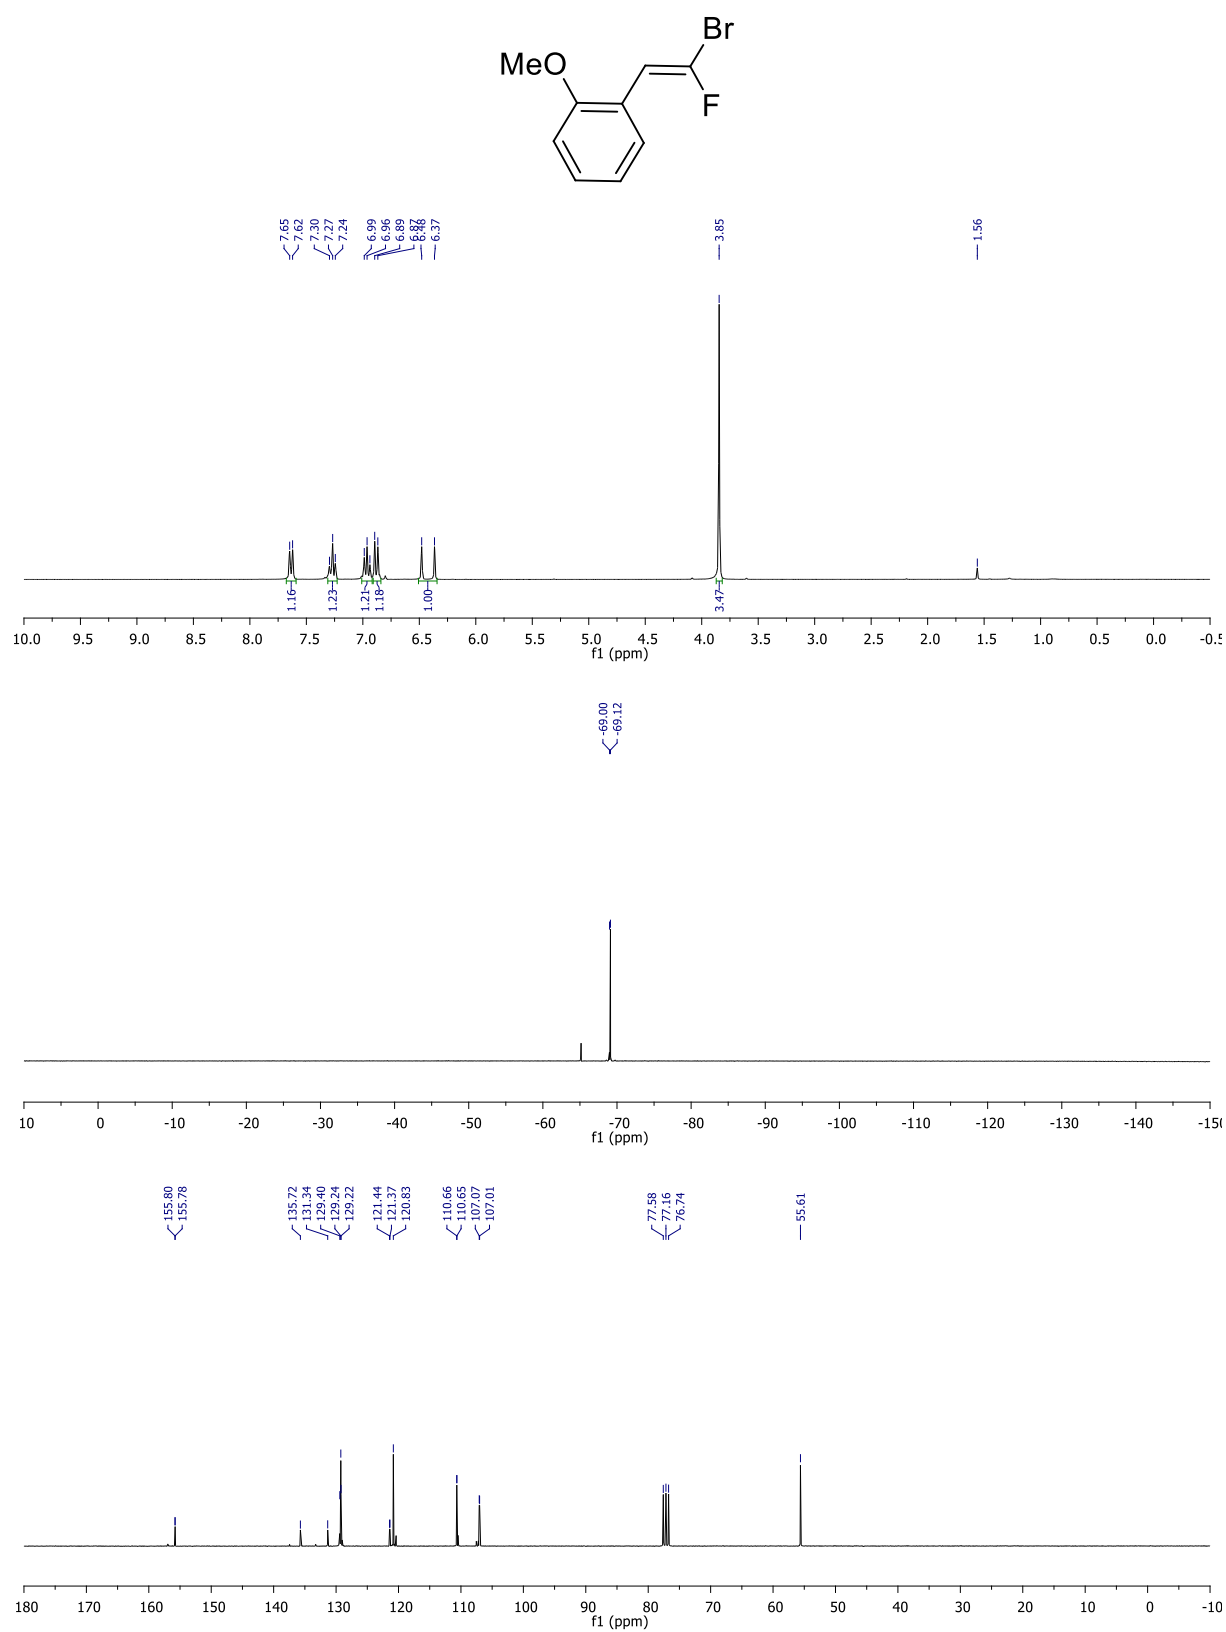



Heteroaryl **3Ba**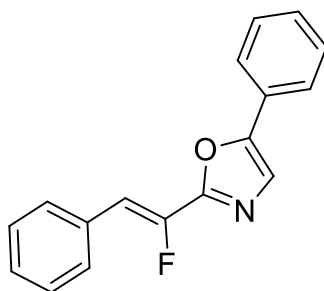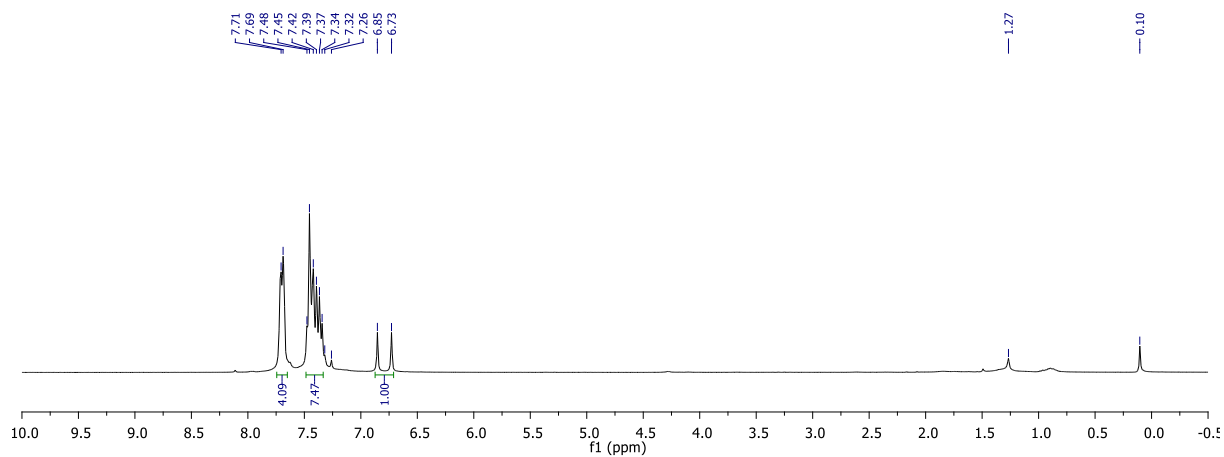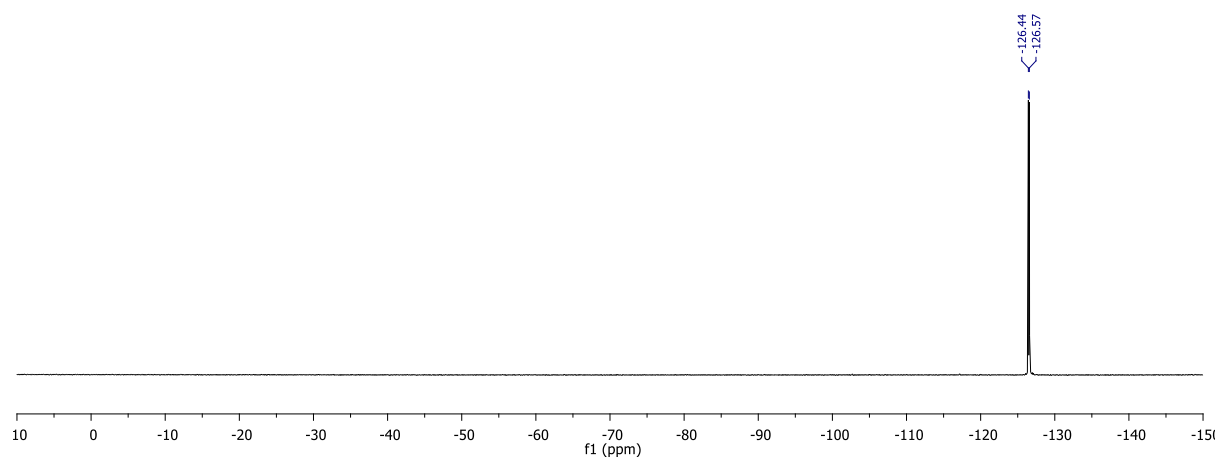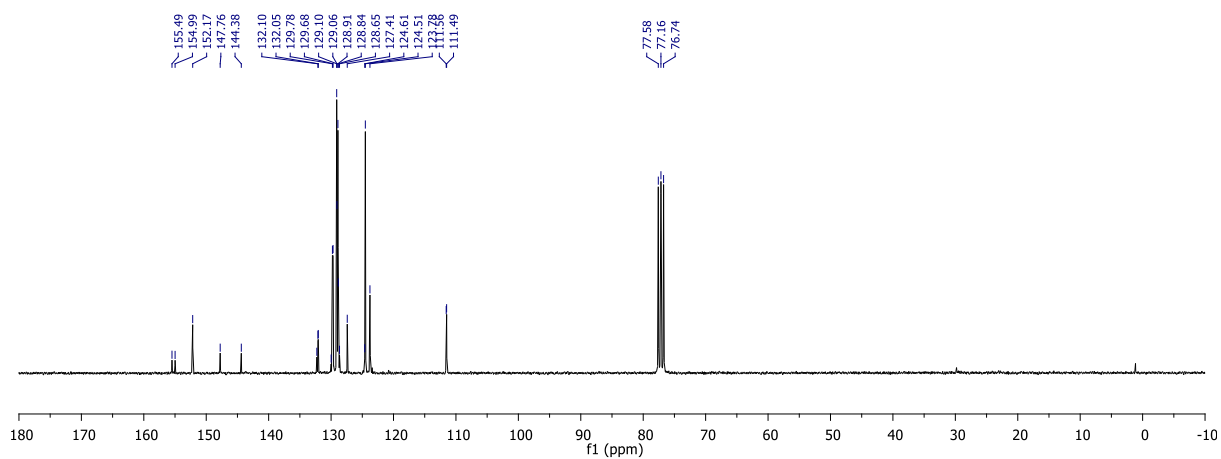

## Heteroaryl 3Ca

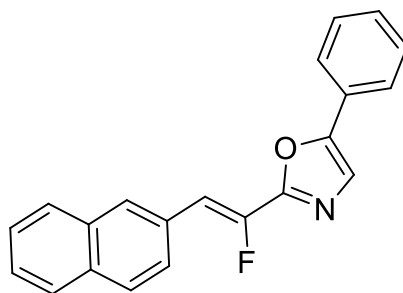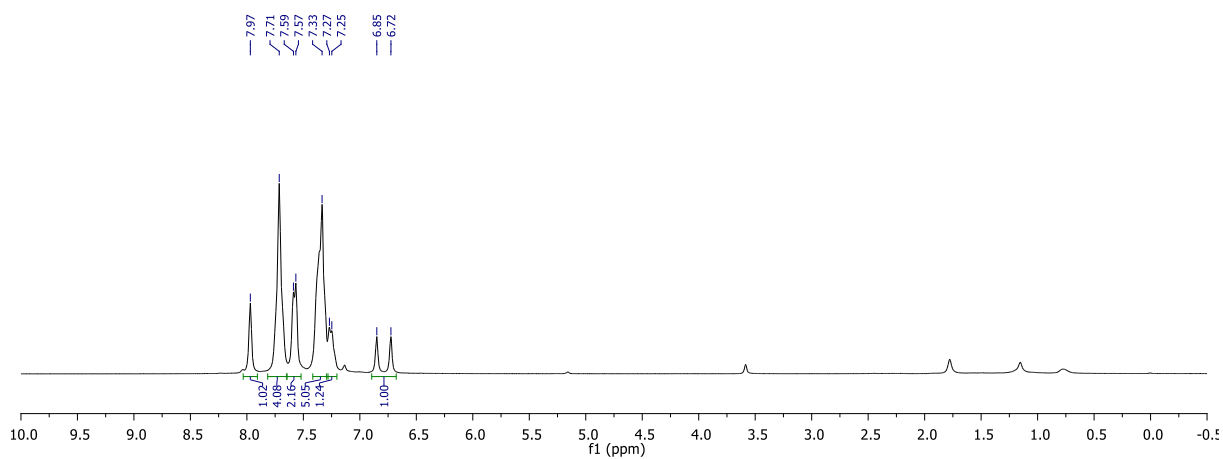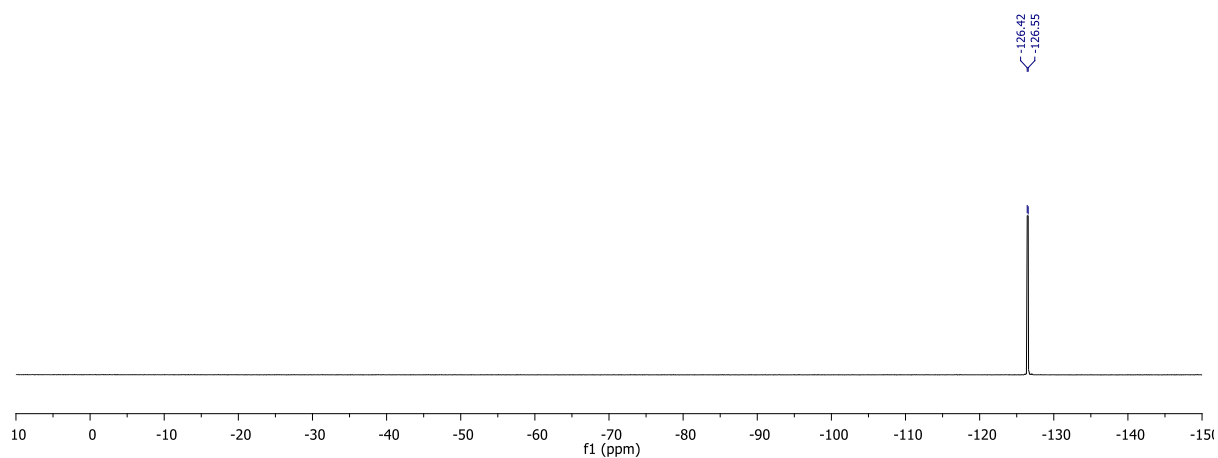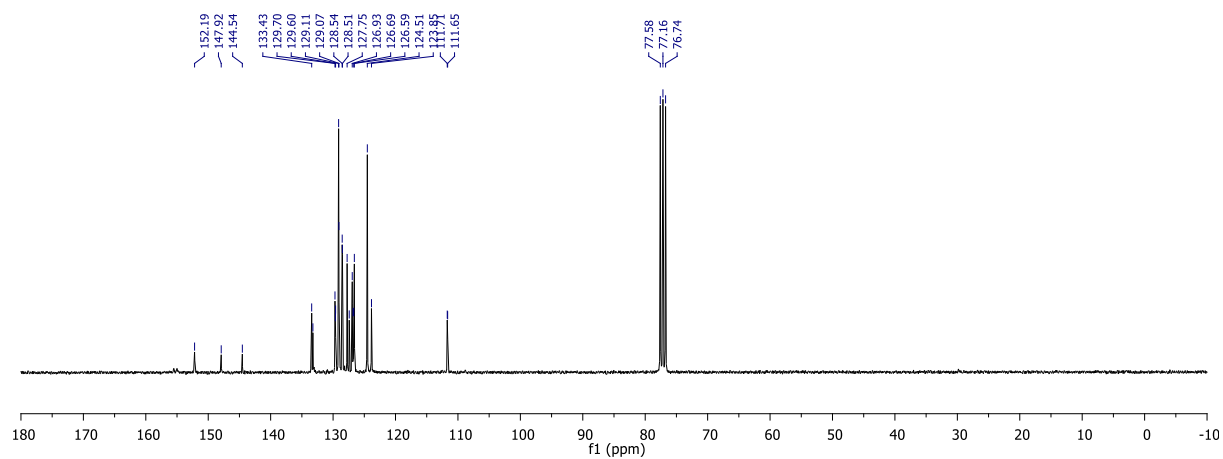

Heteroaryl **3Ea**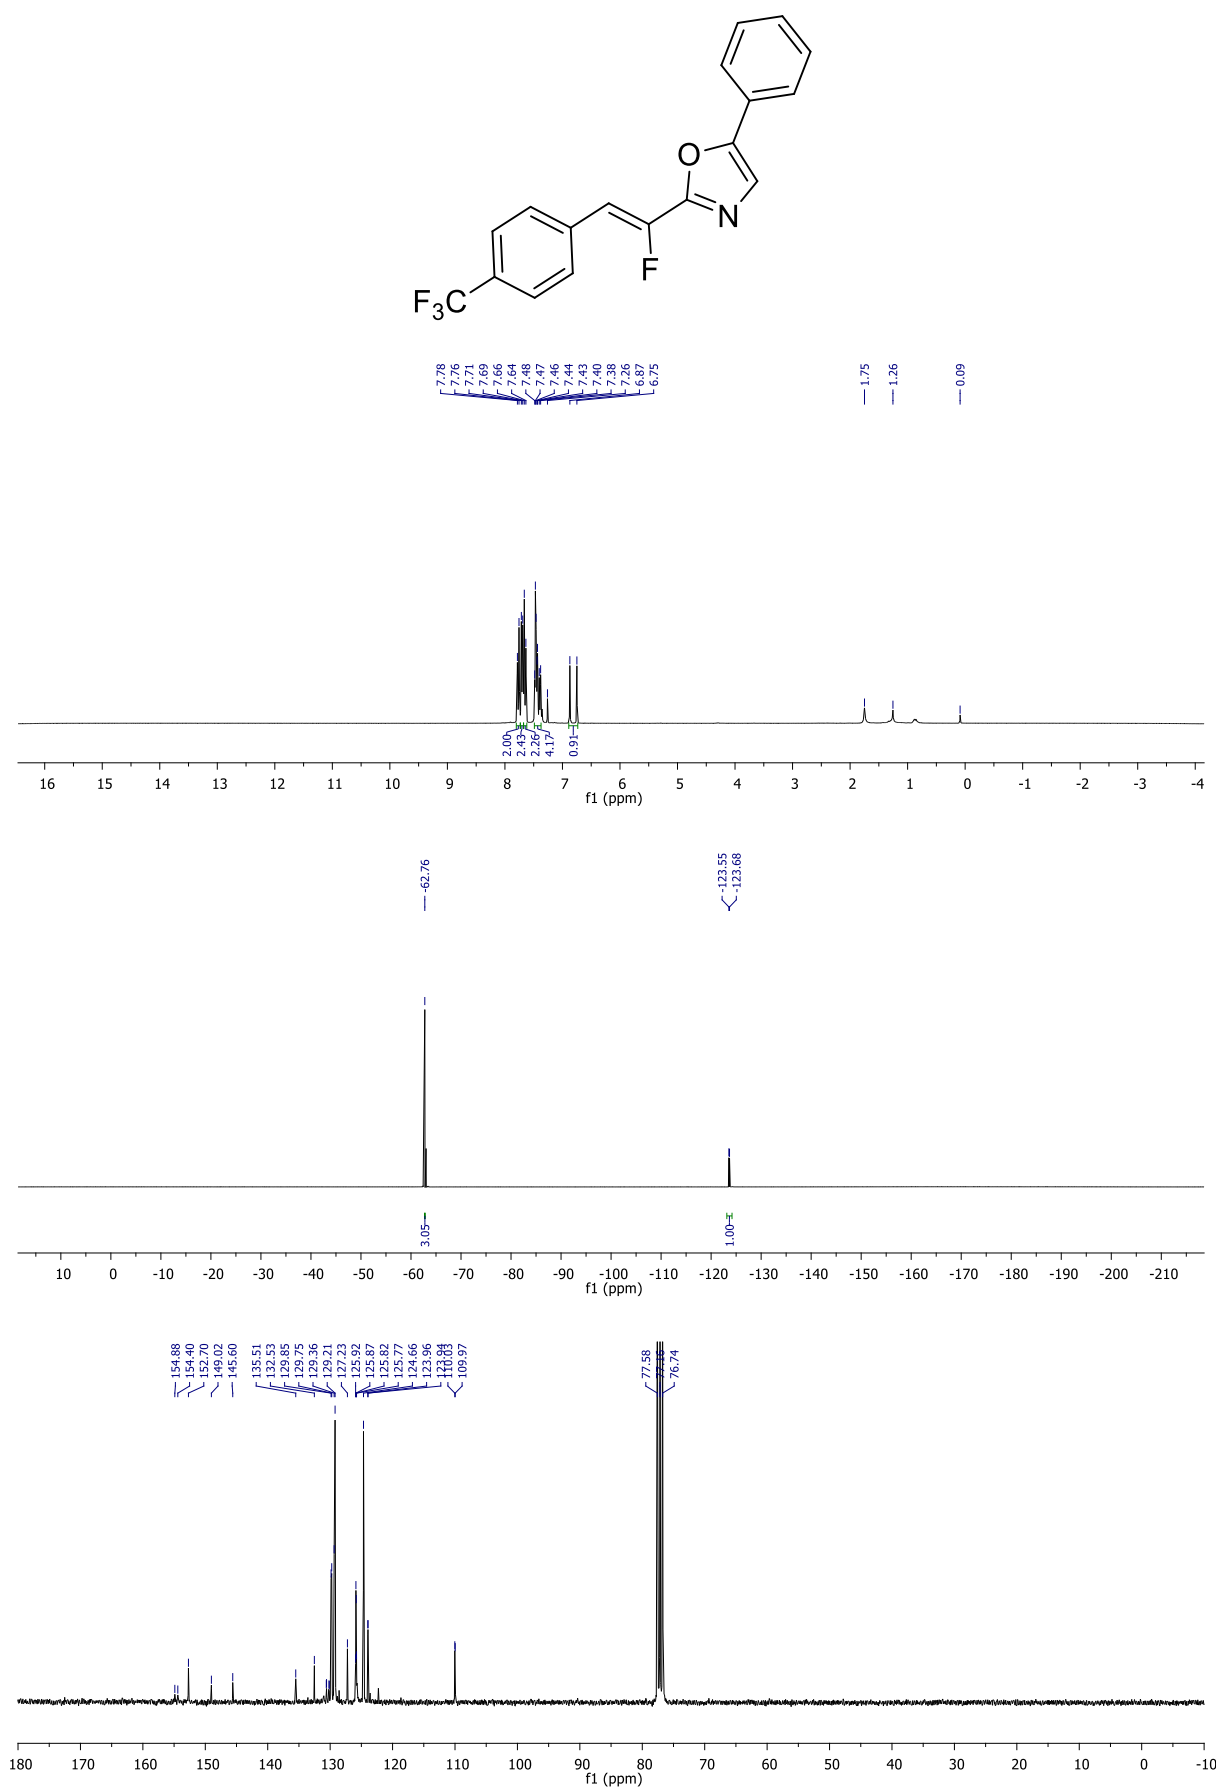

Heteroaryl **3Fa**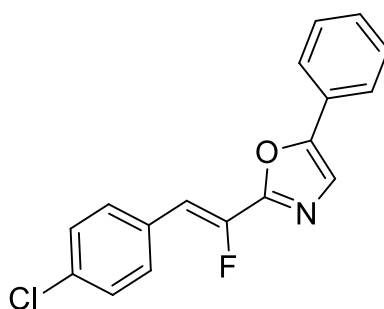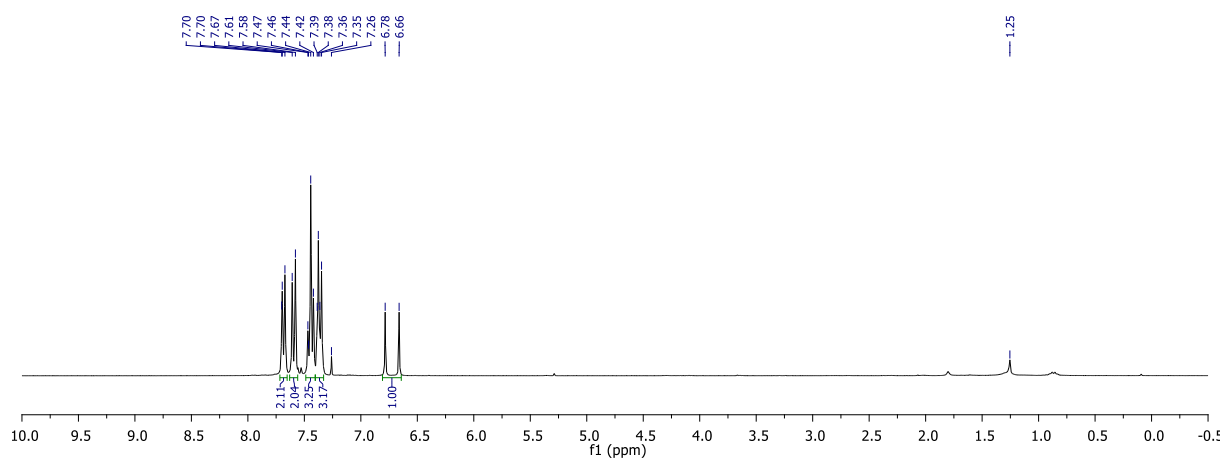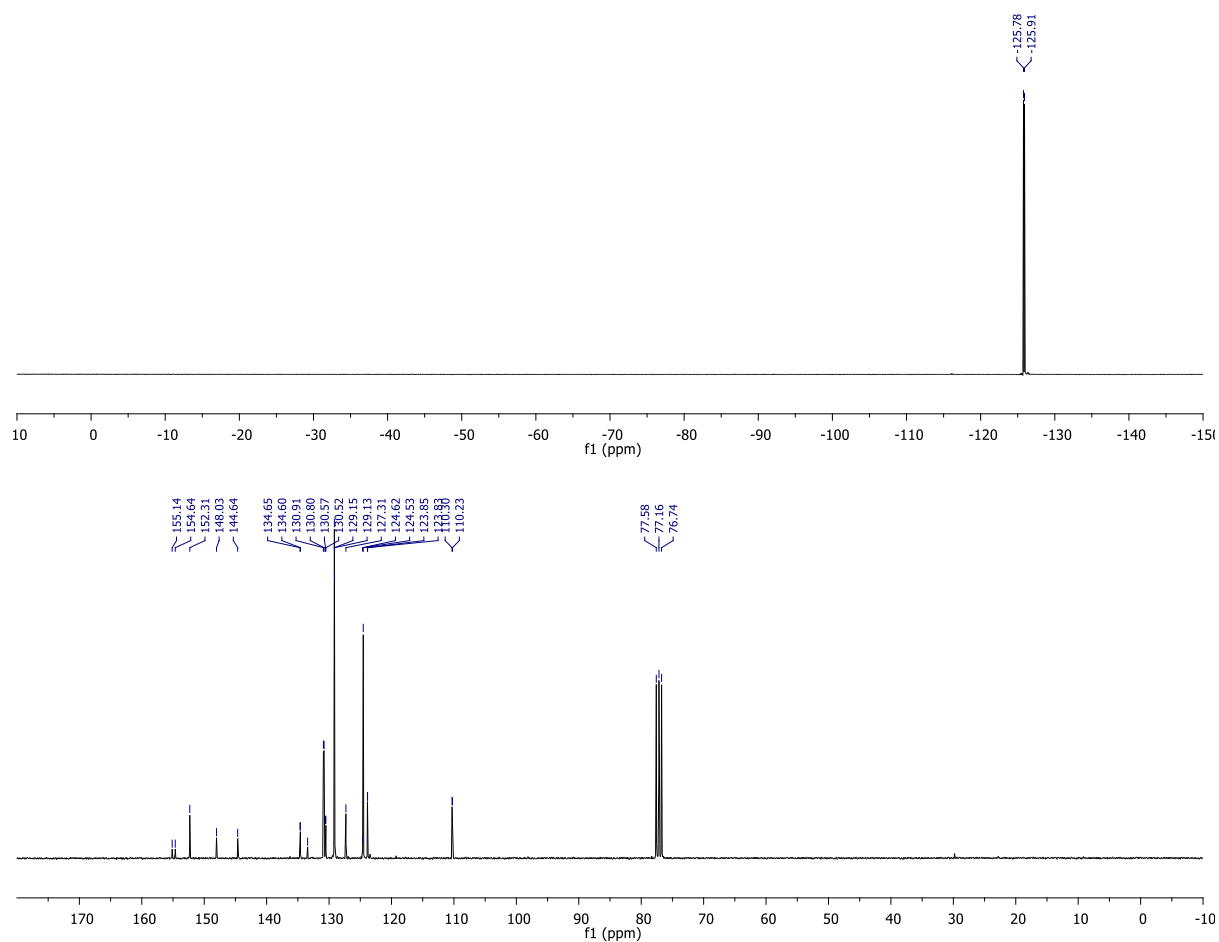

## Heteroaryl 3Ga

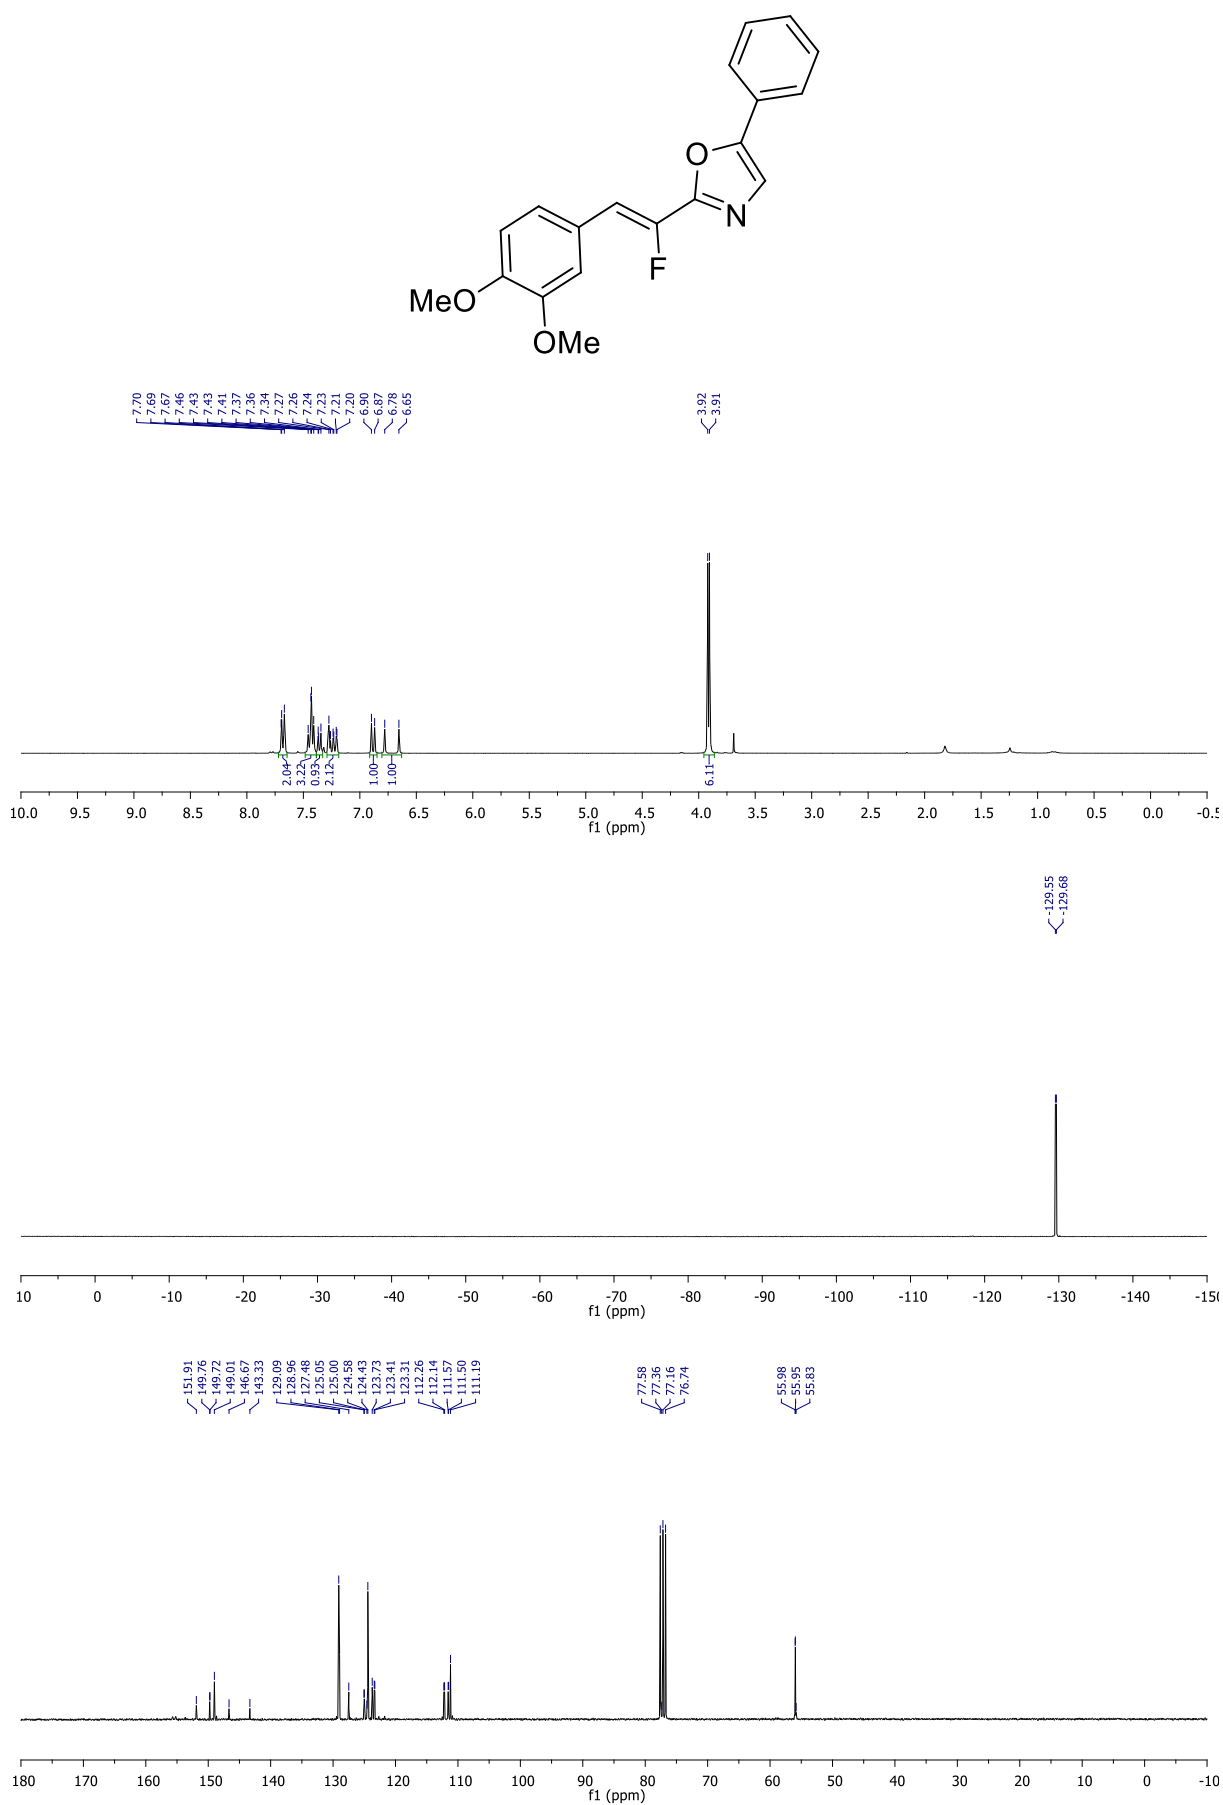

## Heteroaryl 3Ha

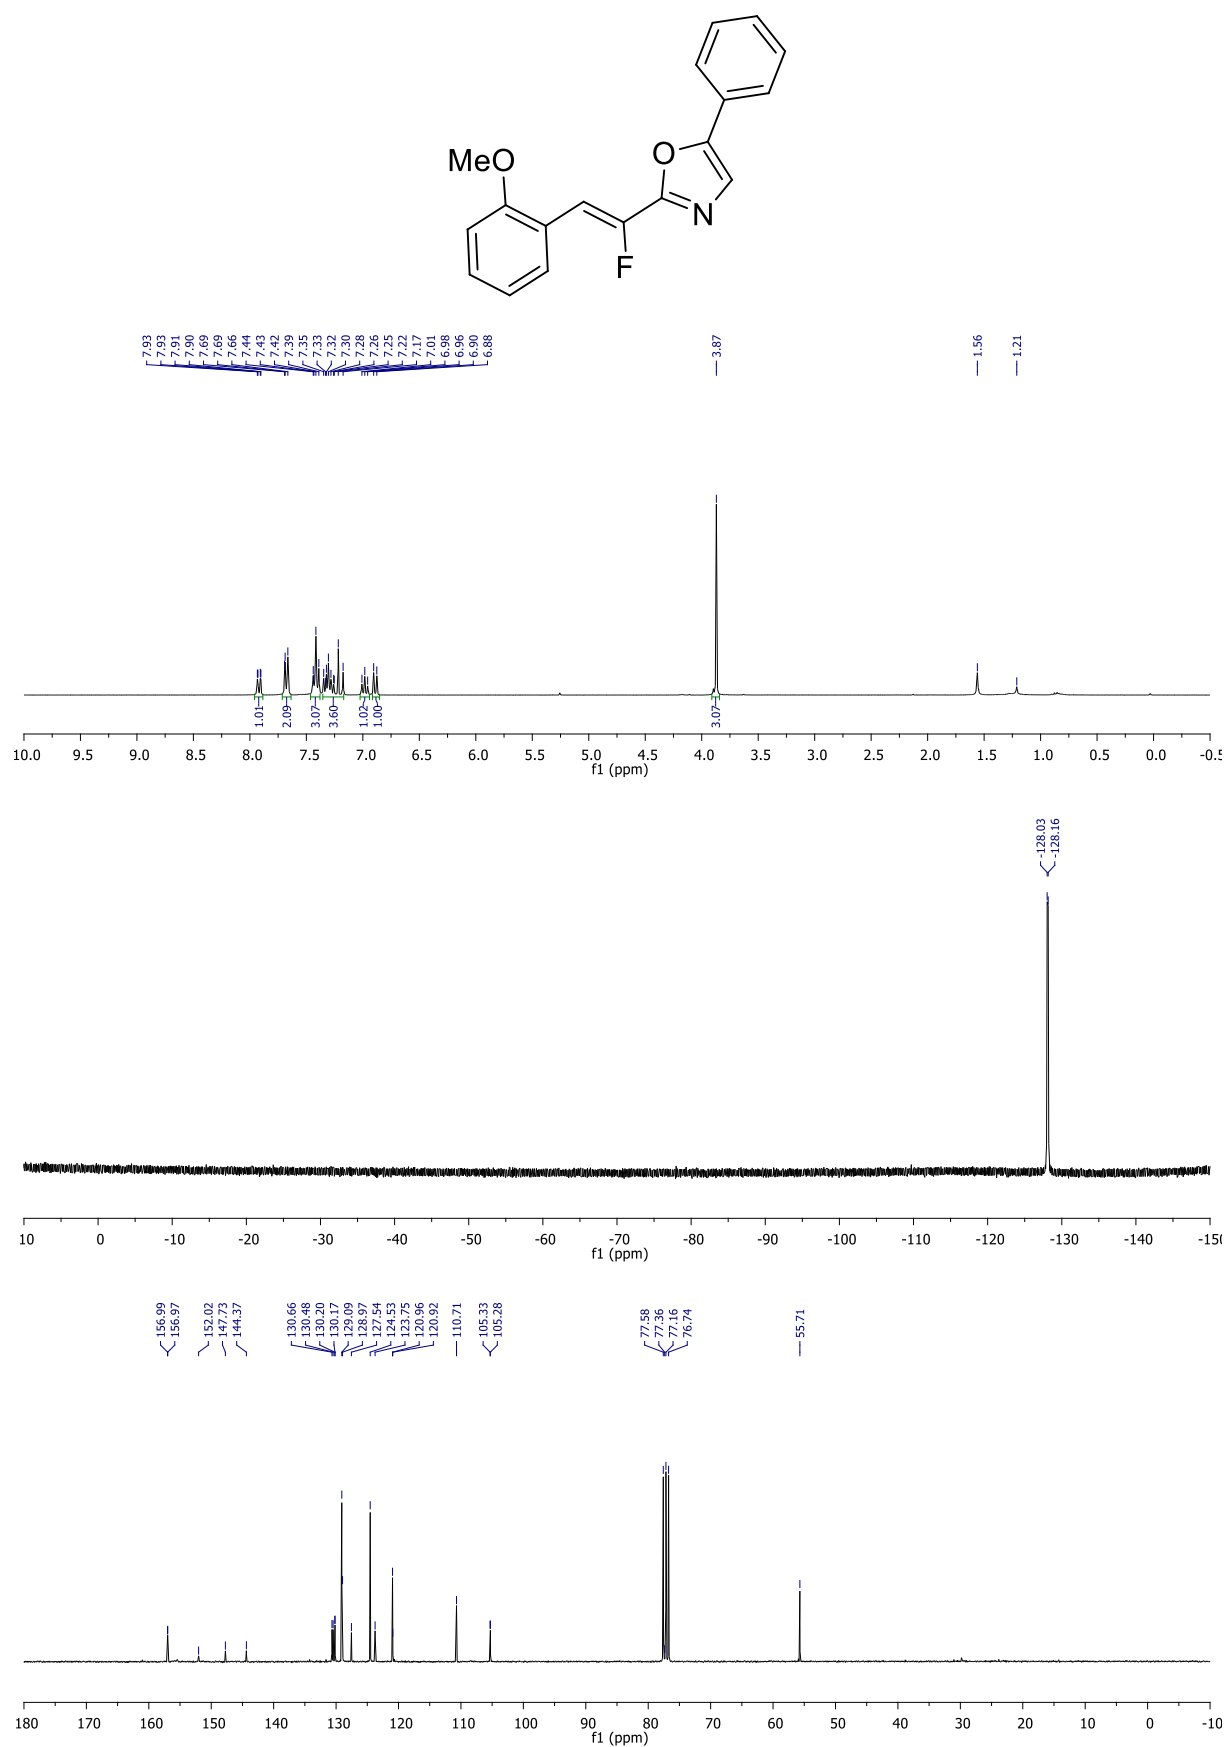

## Heteroaryl 3Ab

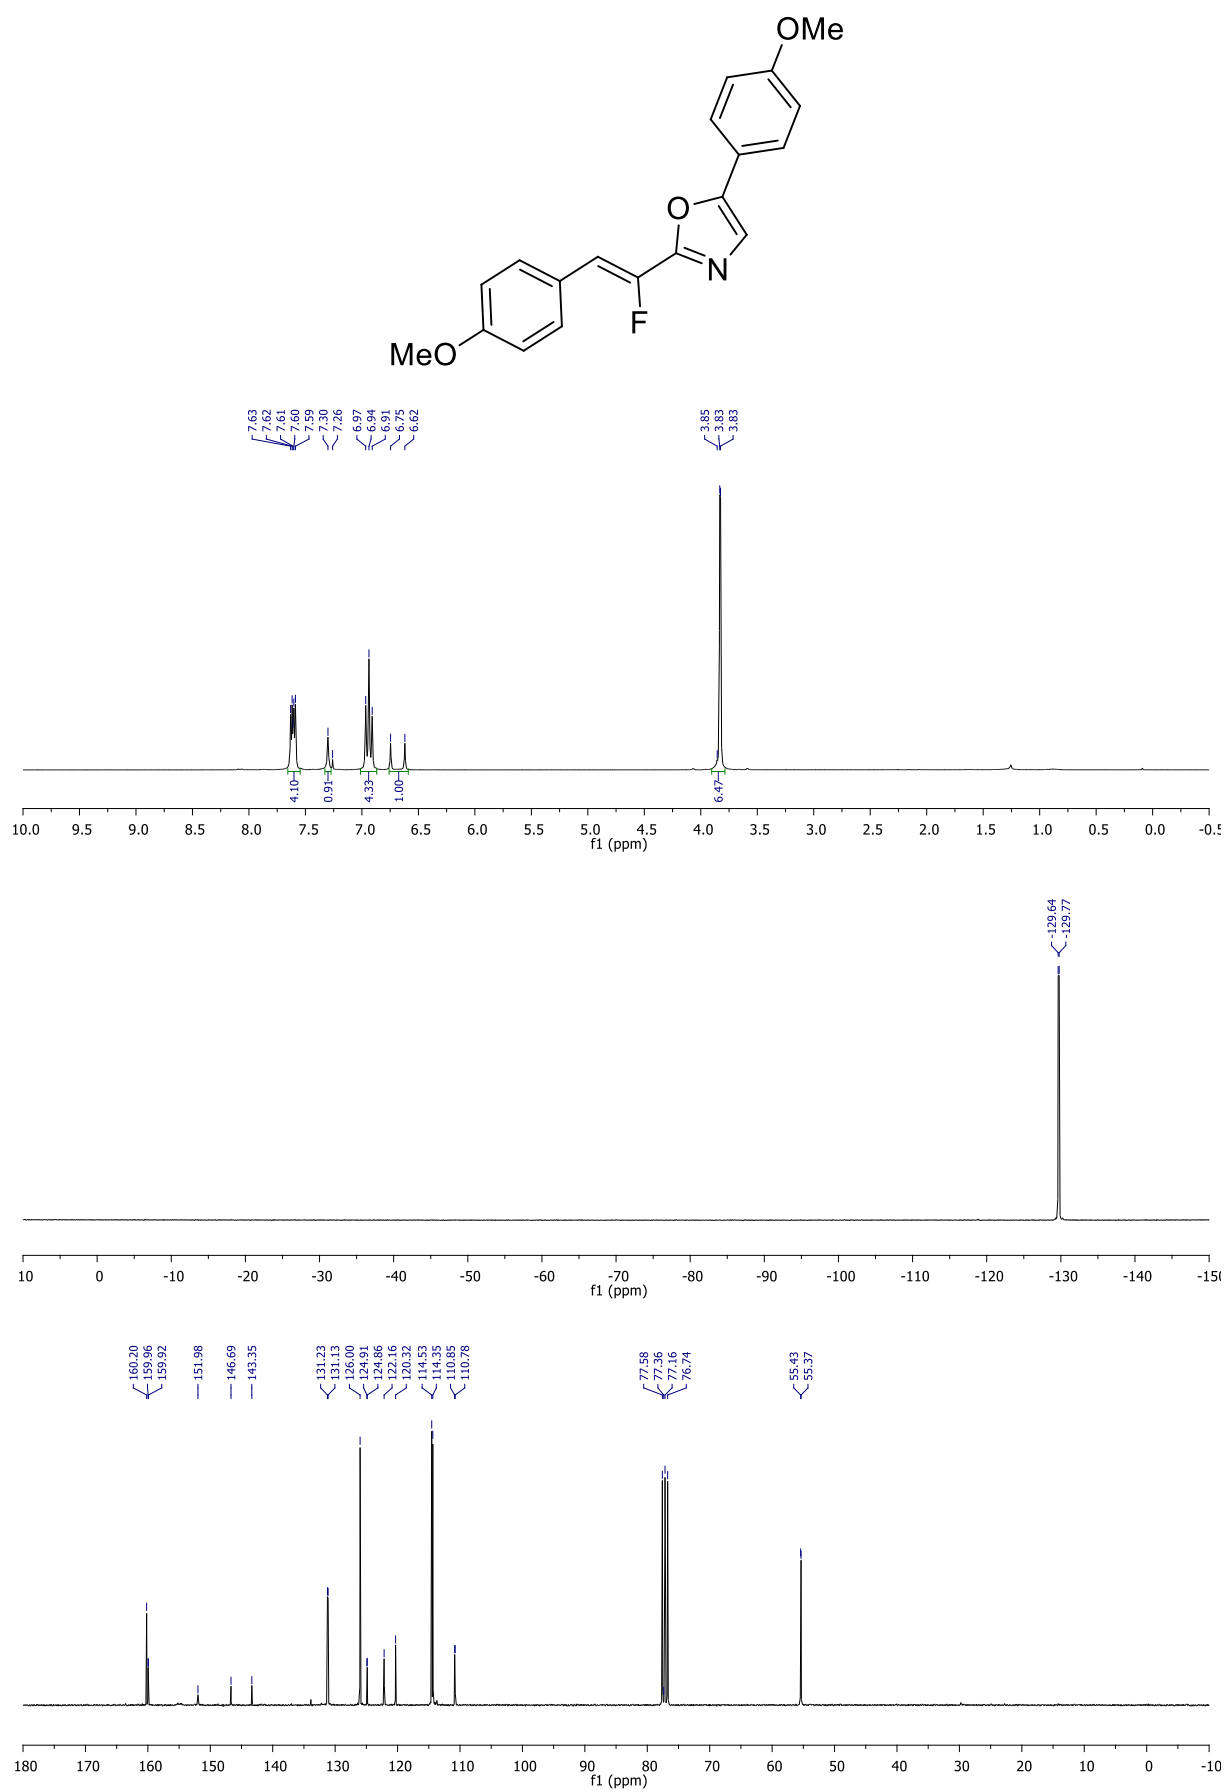

Heteroaryl **3Ac**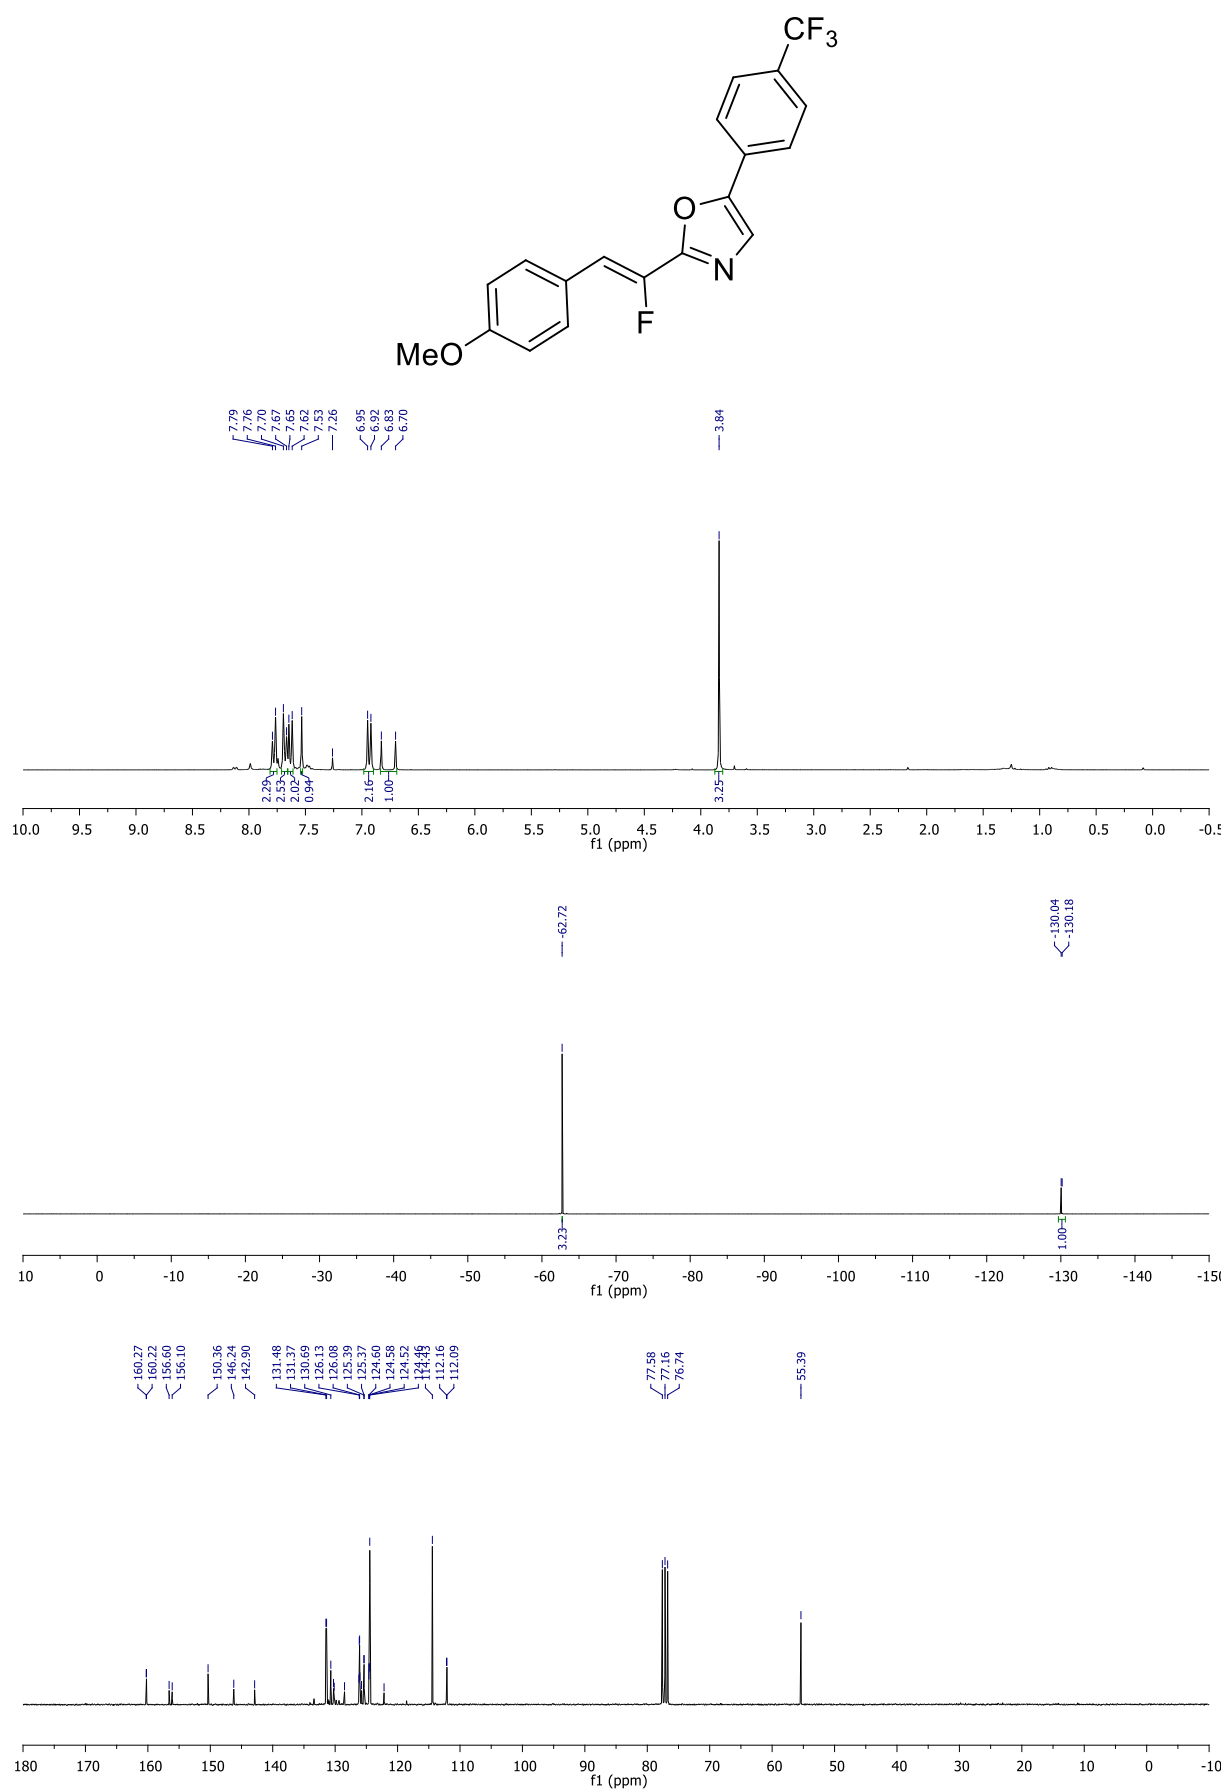



Heteroaryle **3Ad**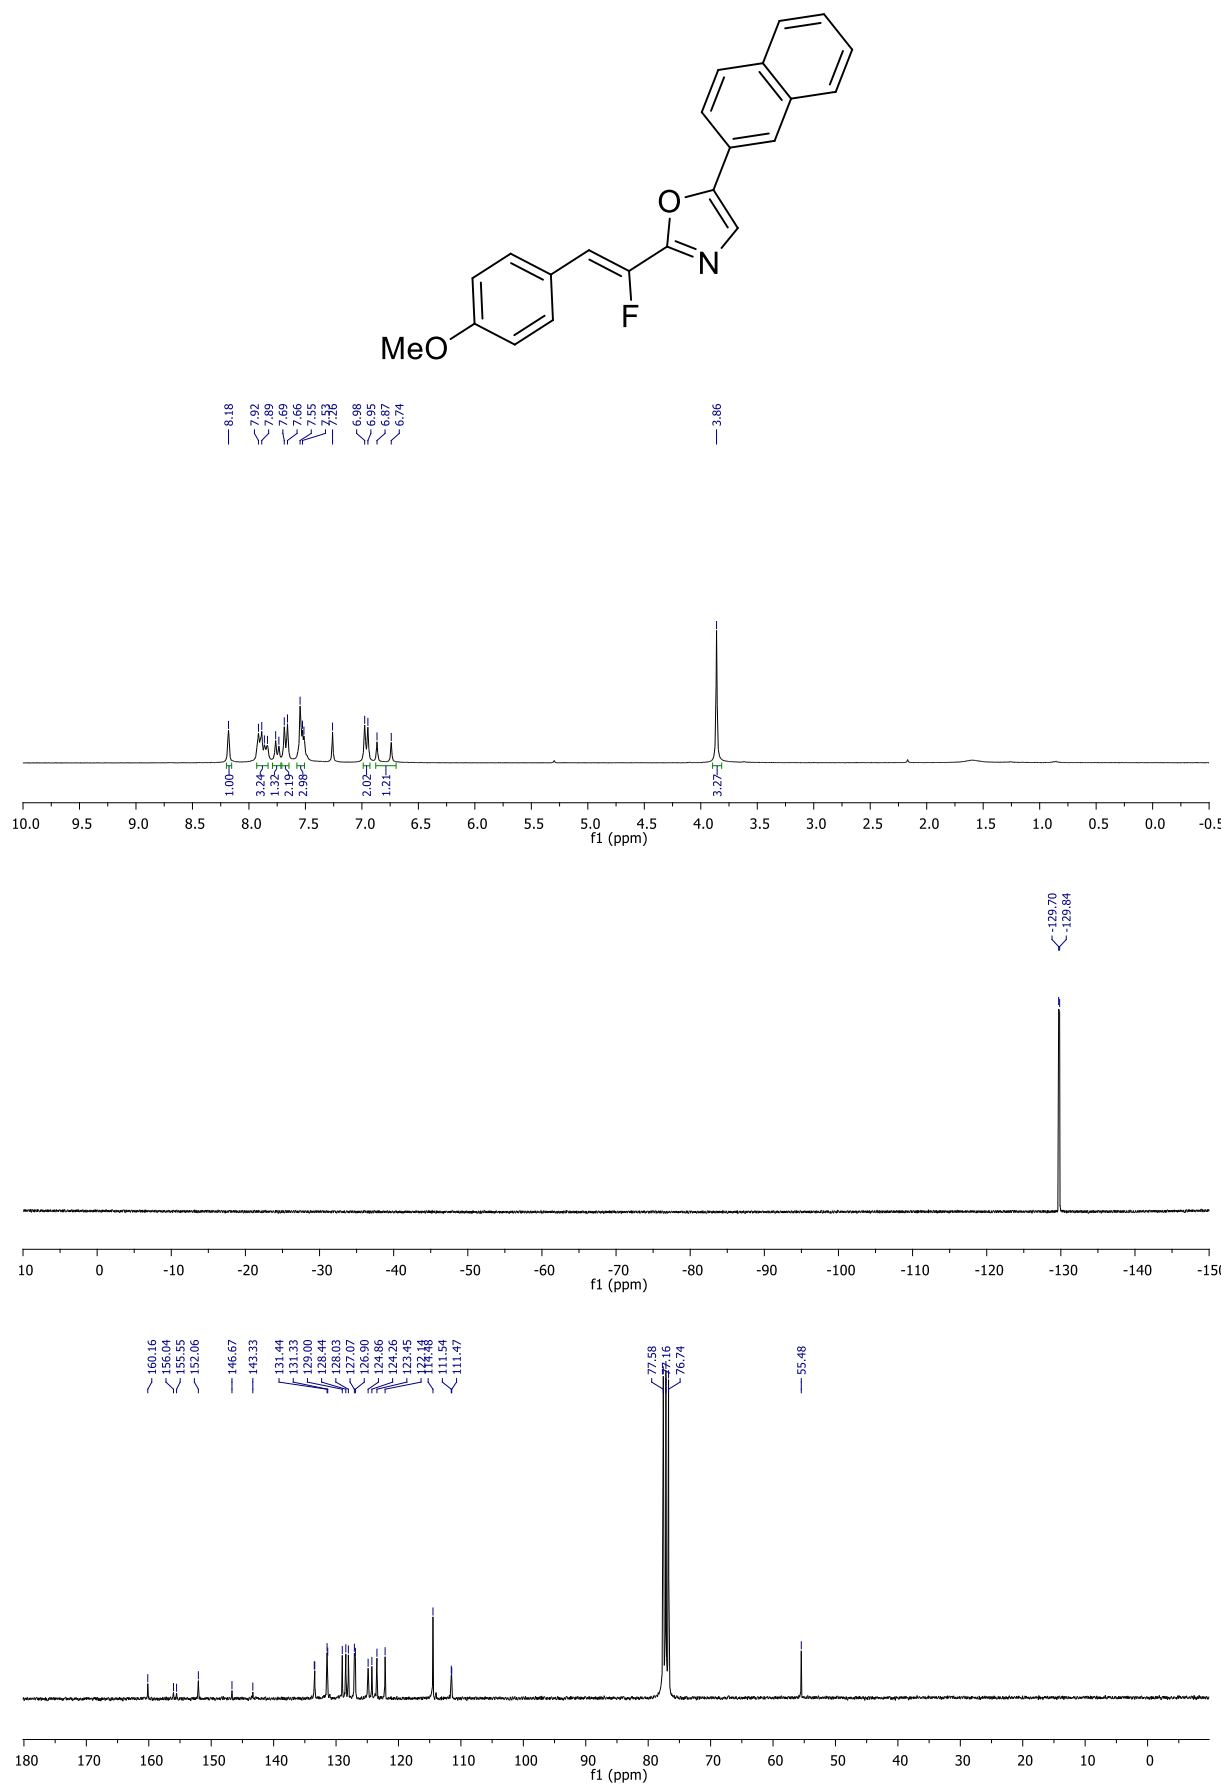

## Heteroaryl 3Ae

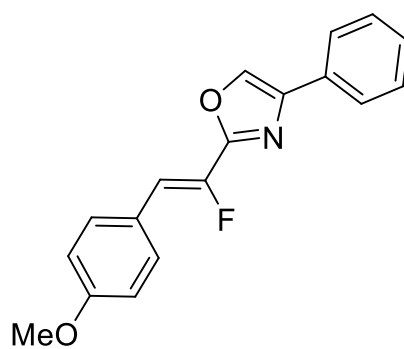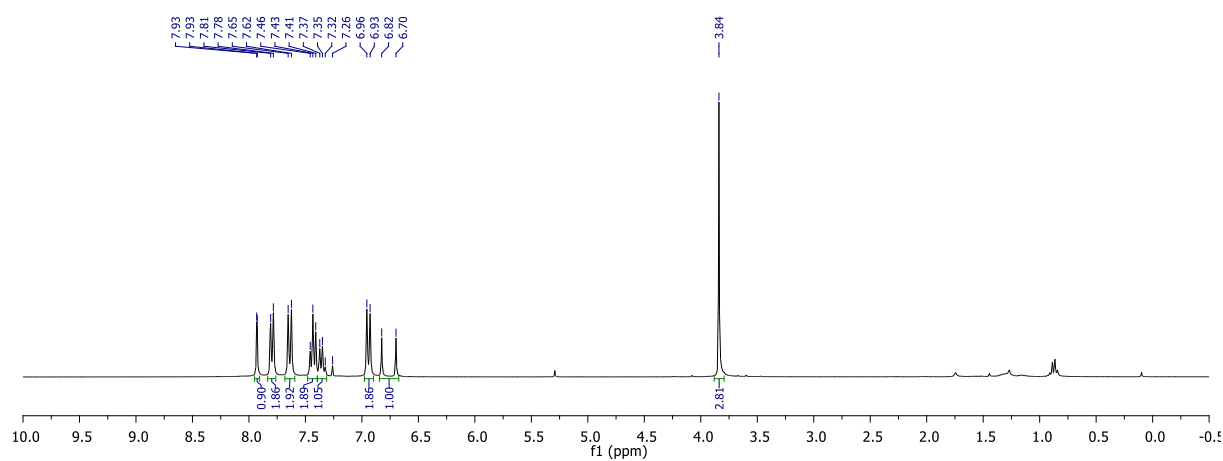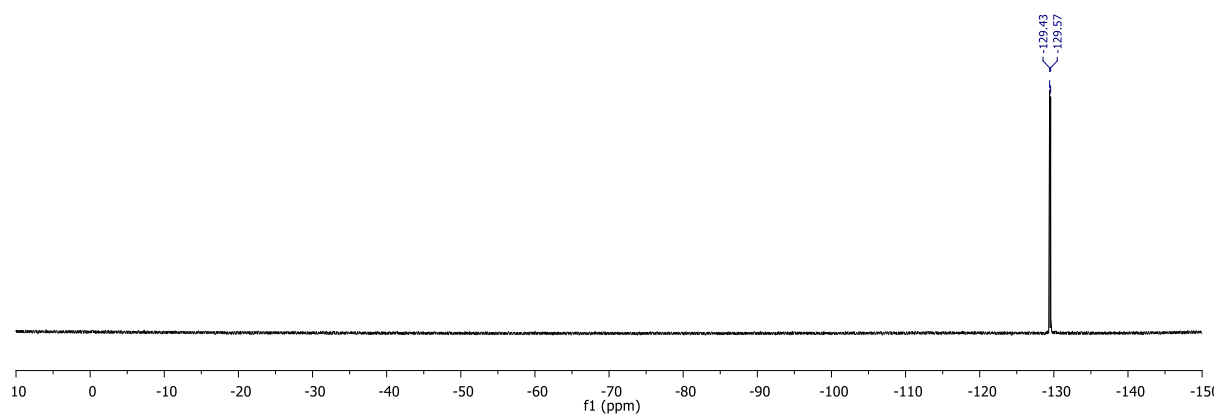

## Heteroaryl 3Cb

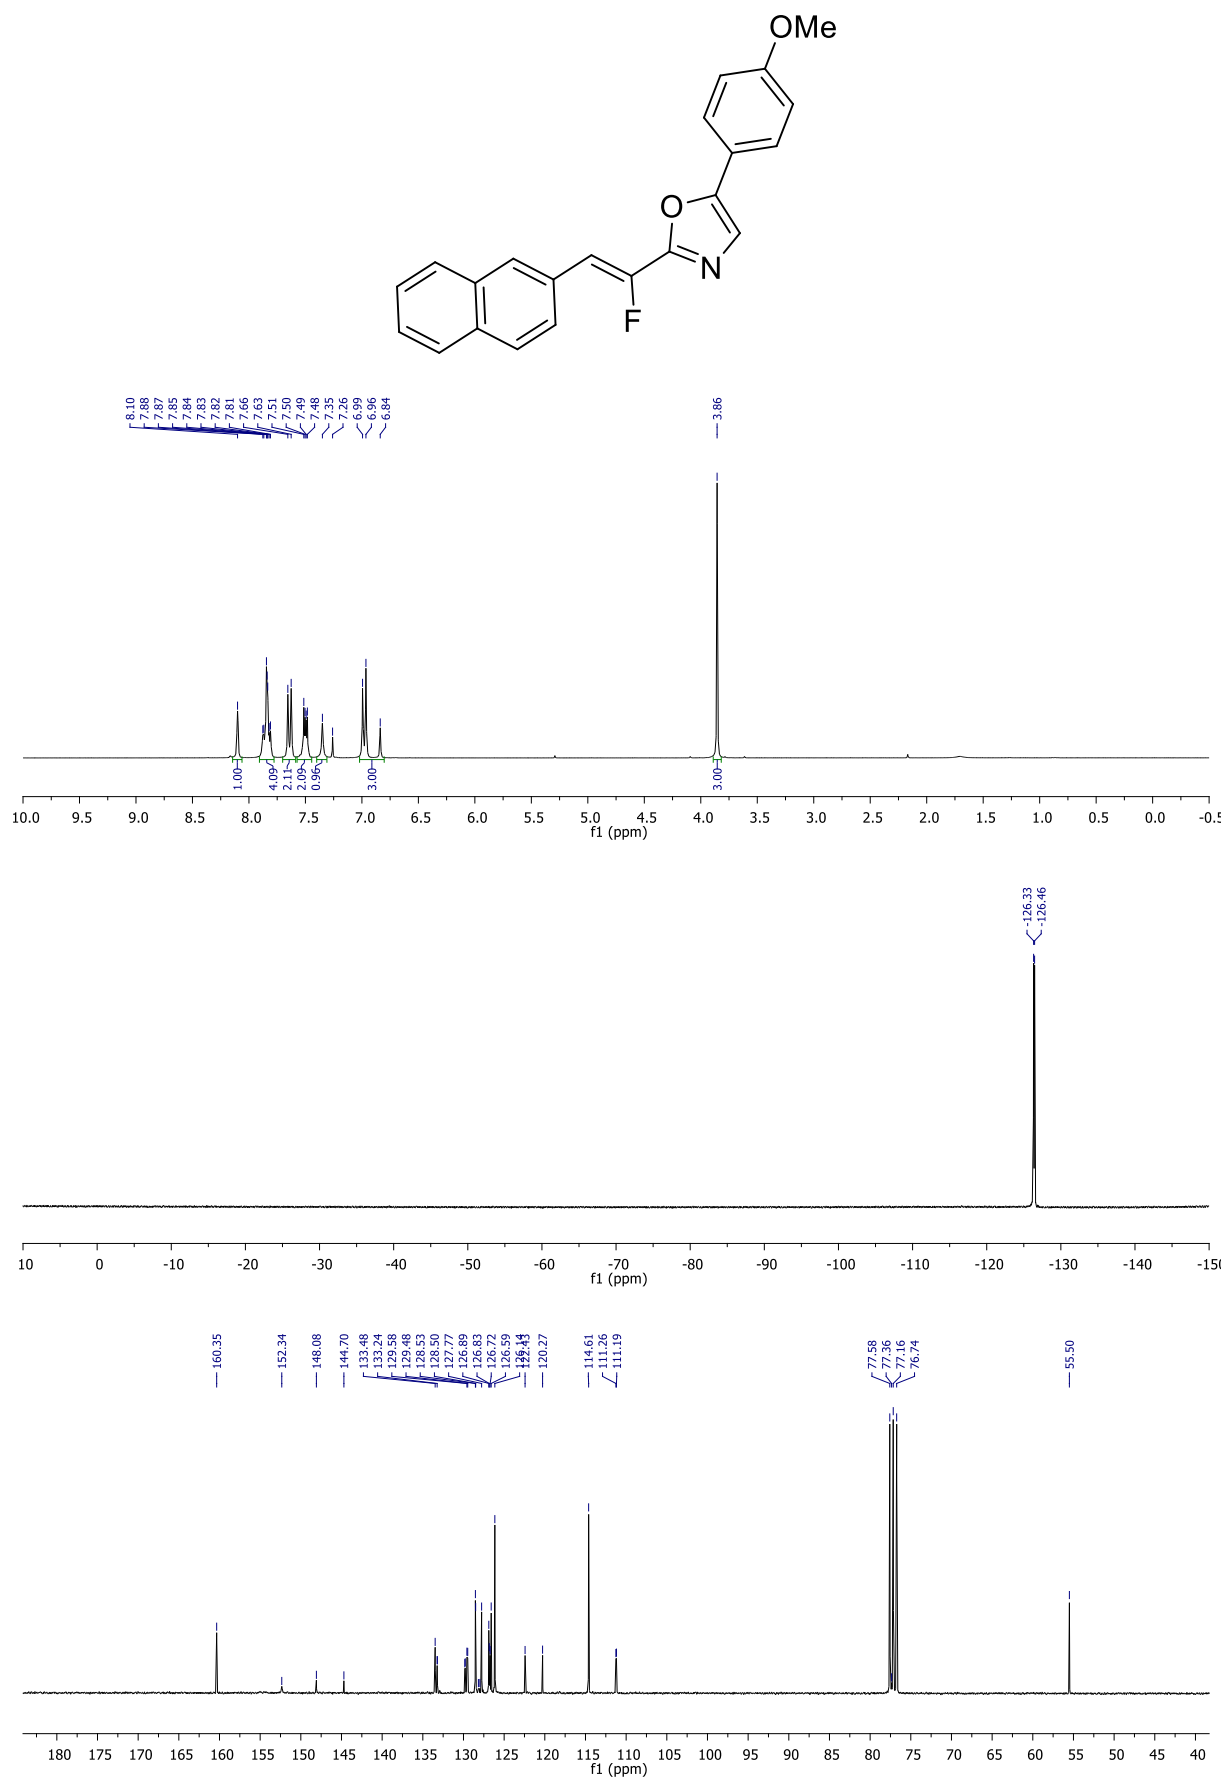

## Heteroaryl 3Ce

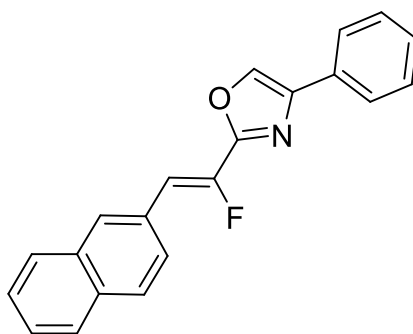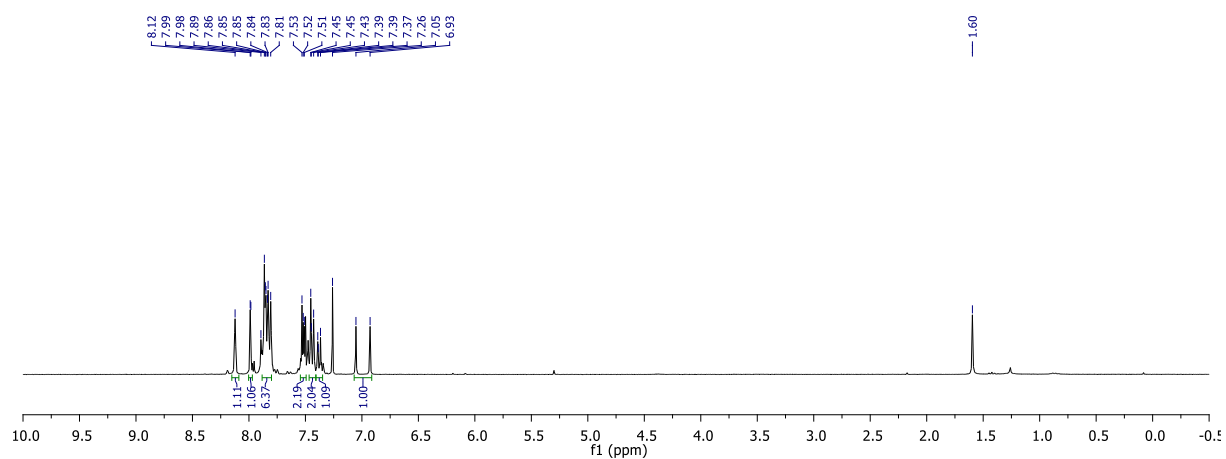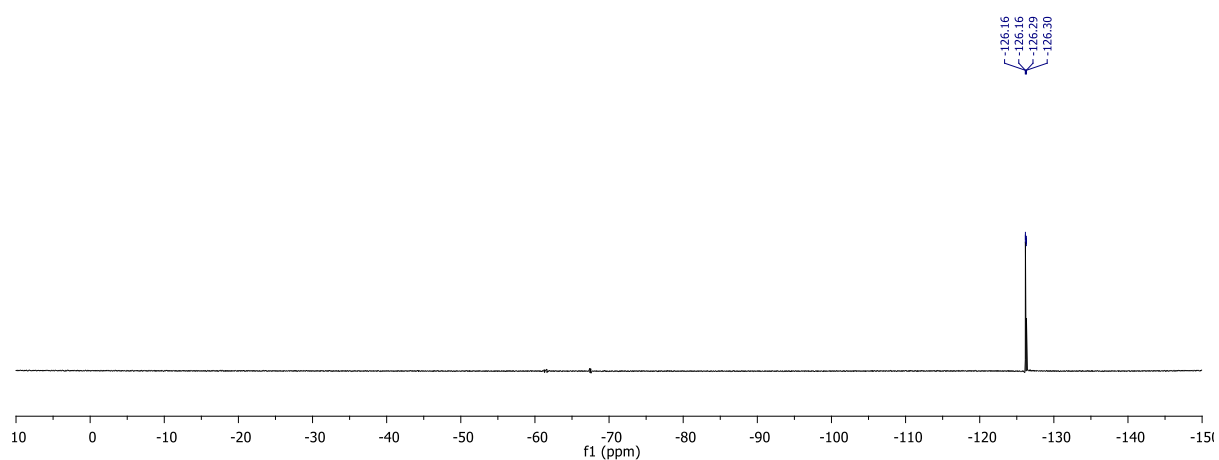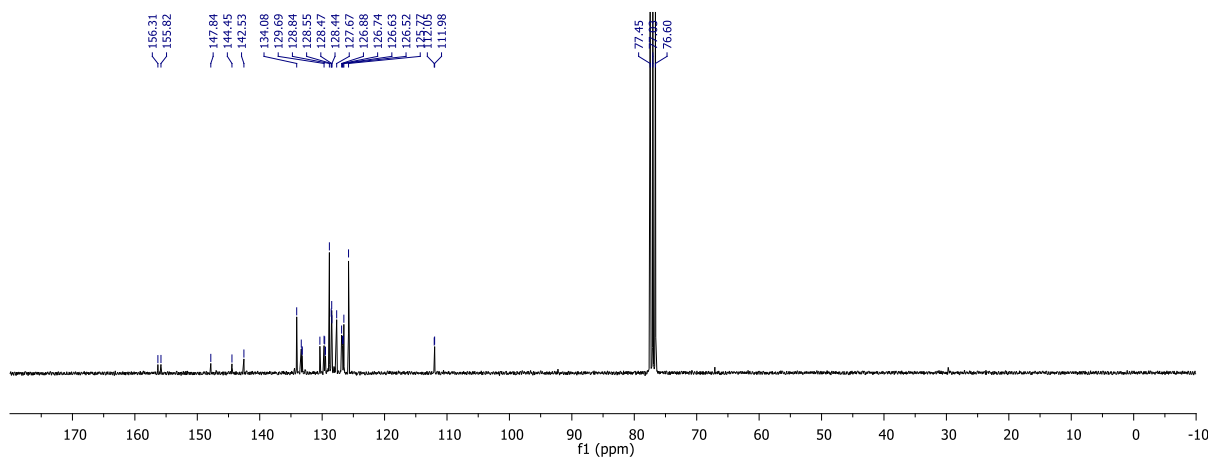

## Heteroaryl 3Dc

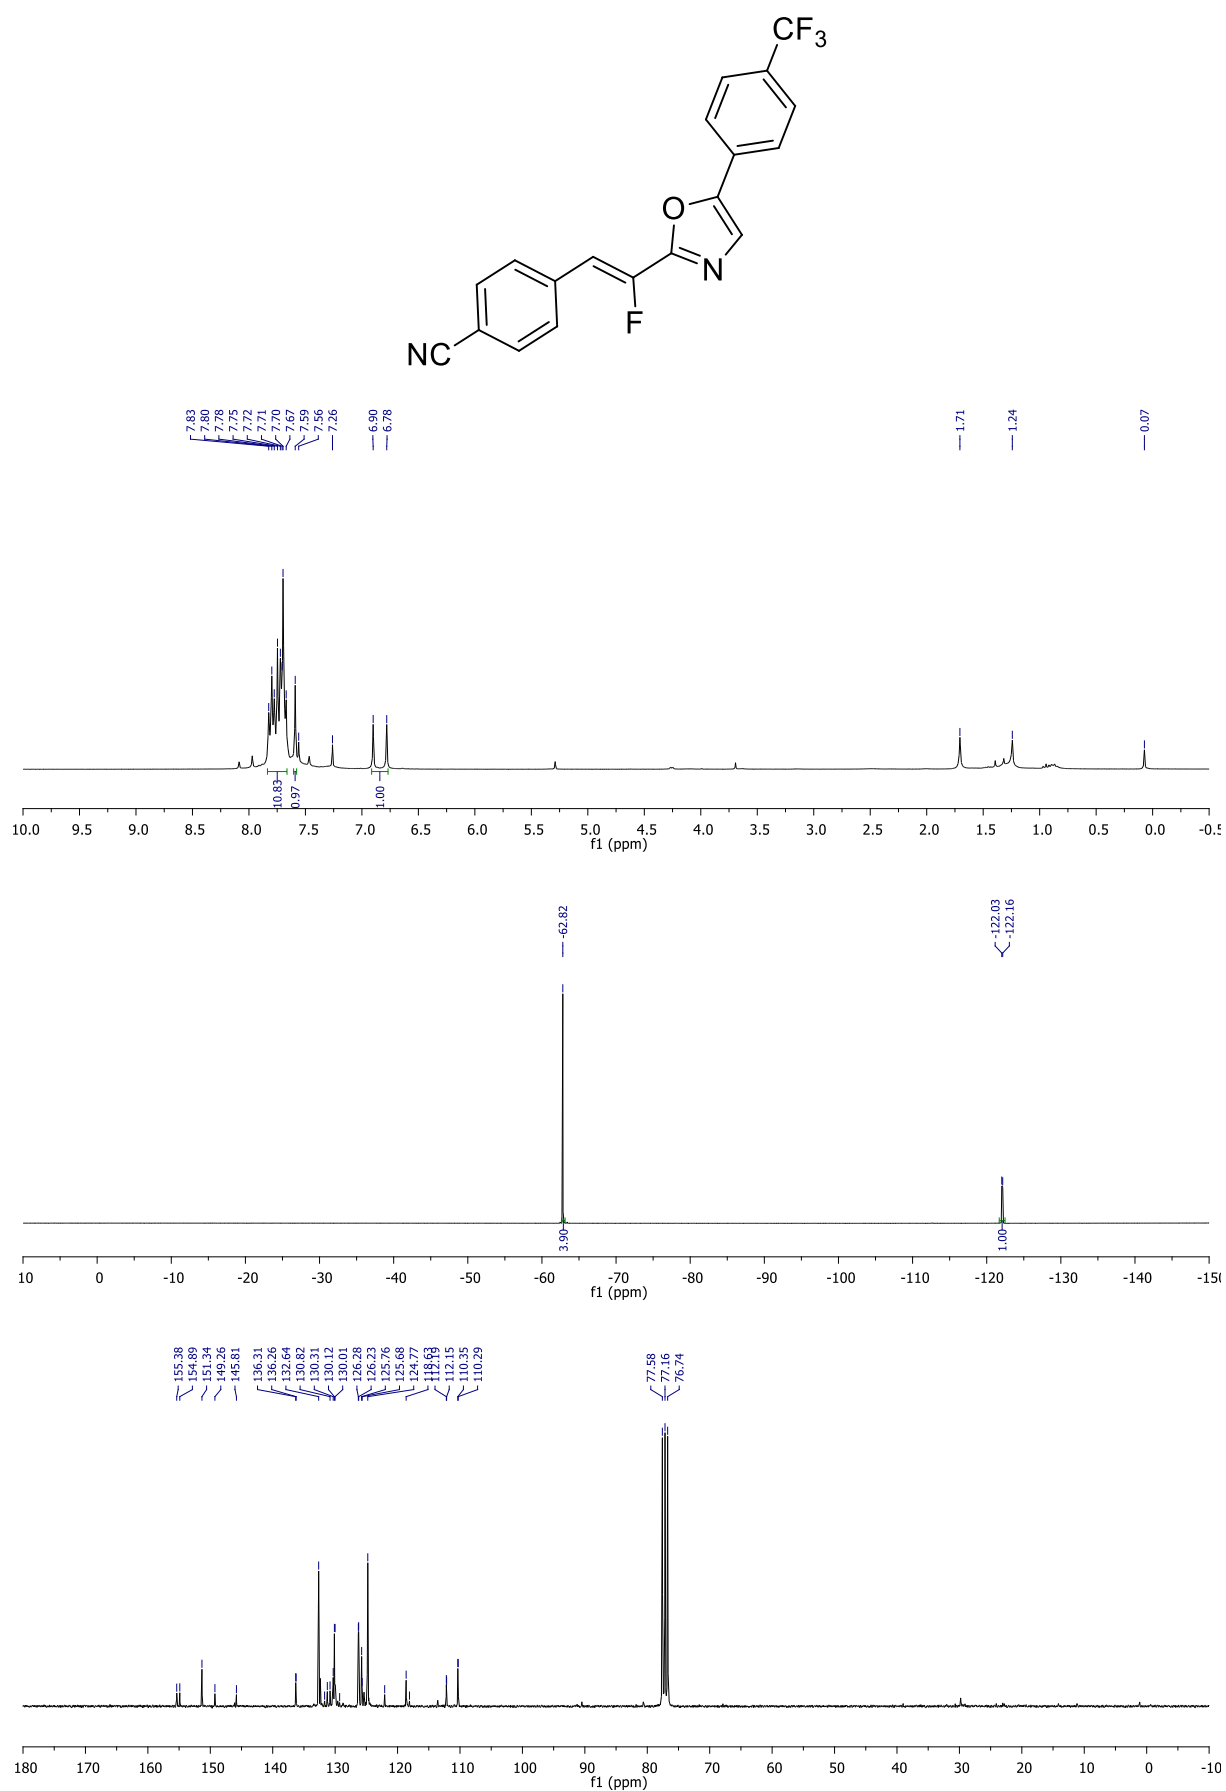

Heteroaryl **3Ee**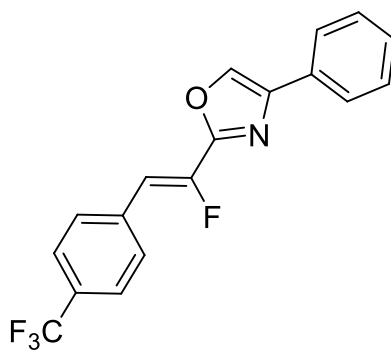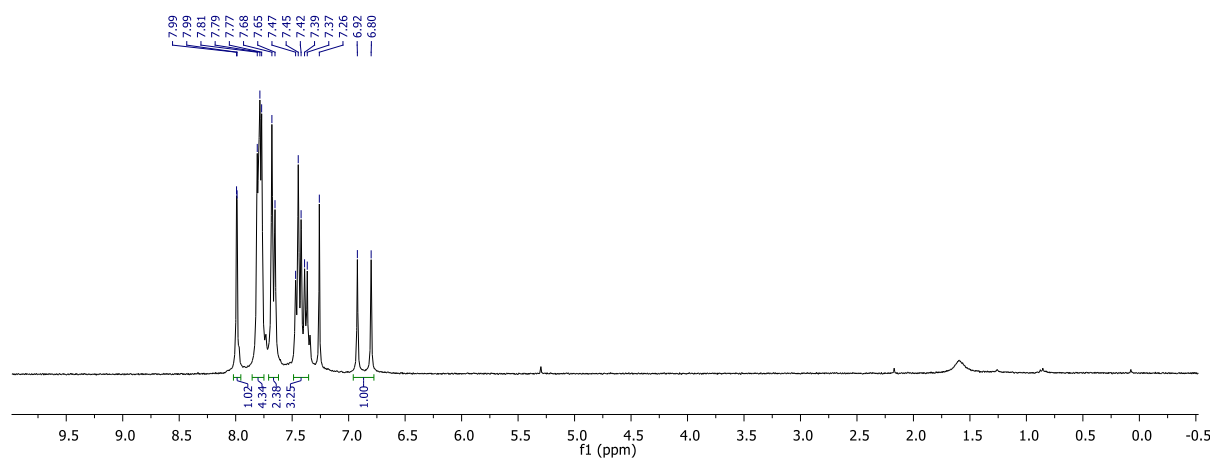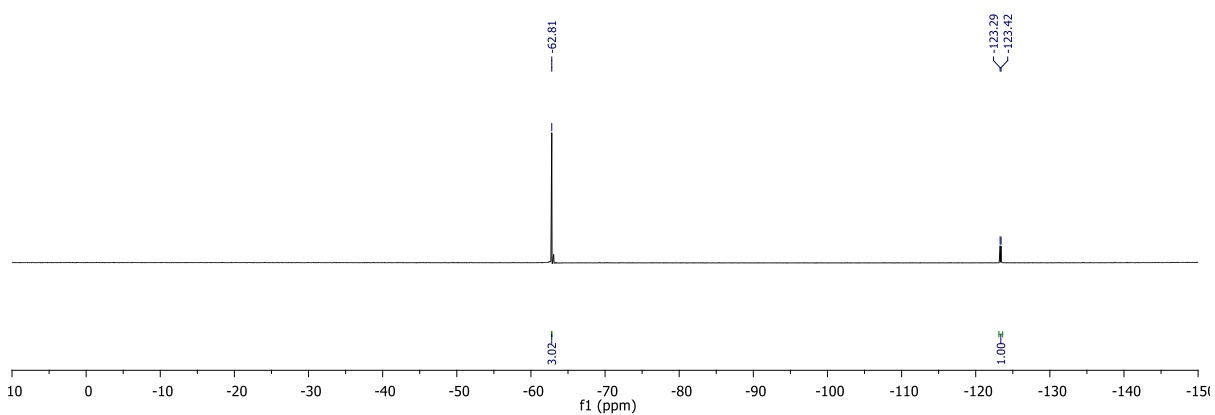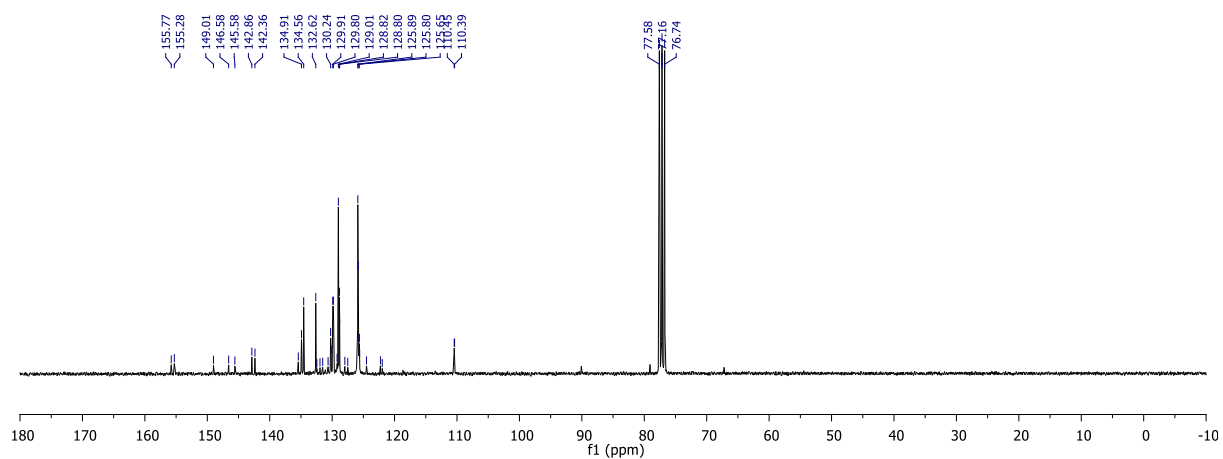

Heteroaryl **3Fd**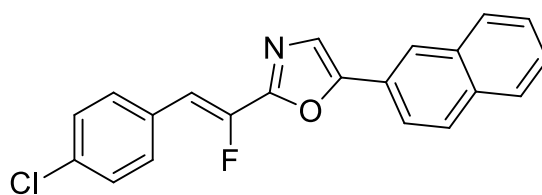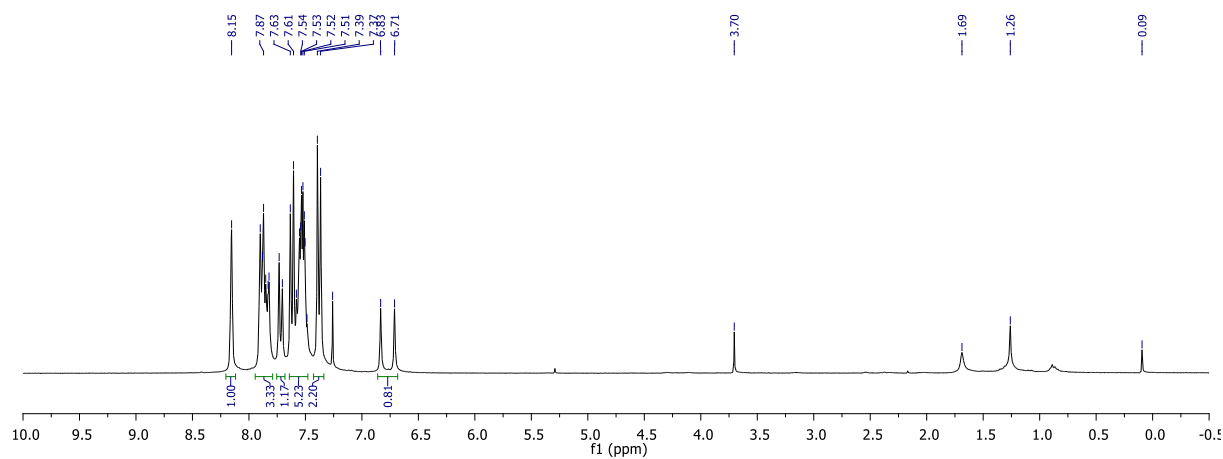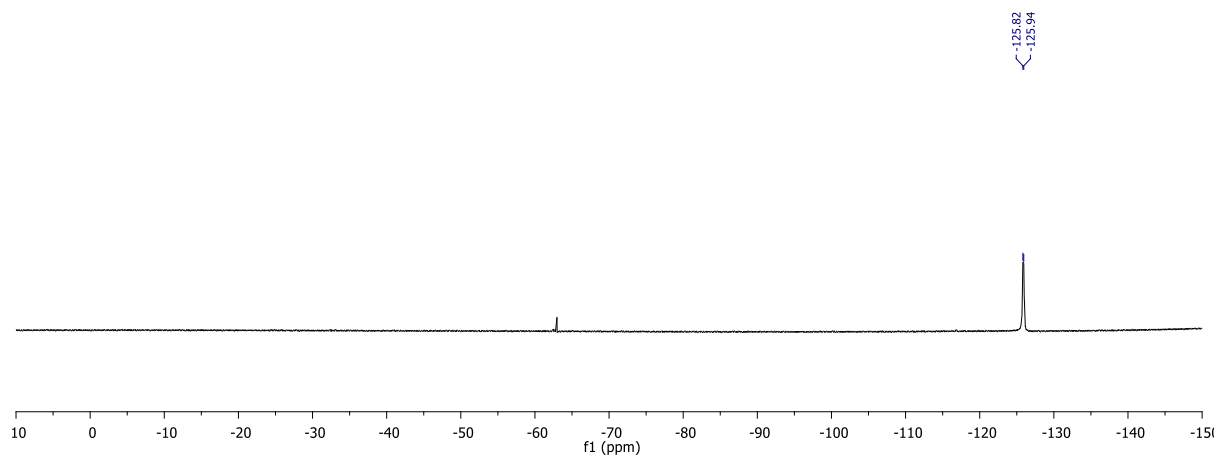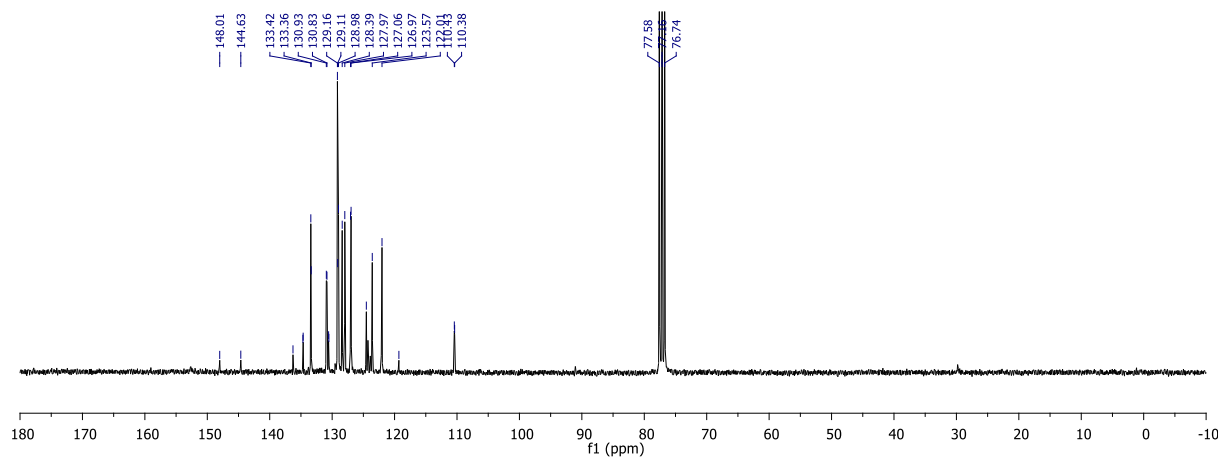

S48

Heteroaryl **4Ab**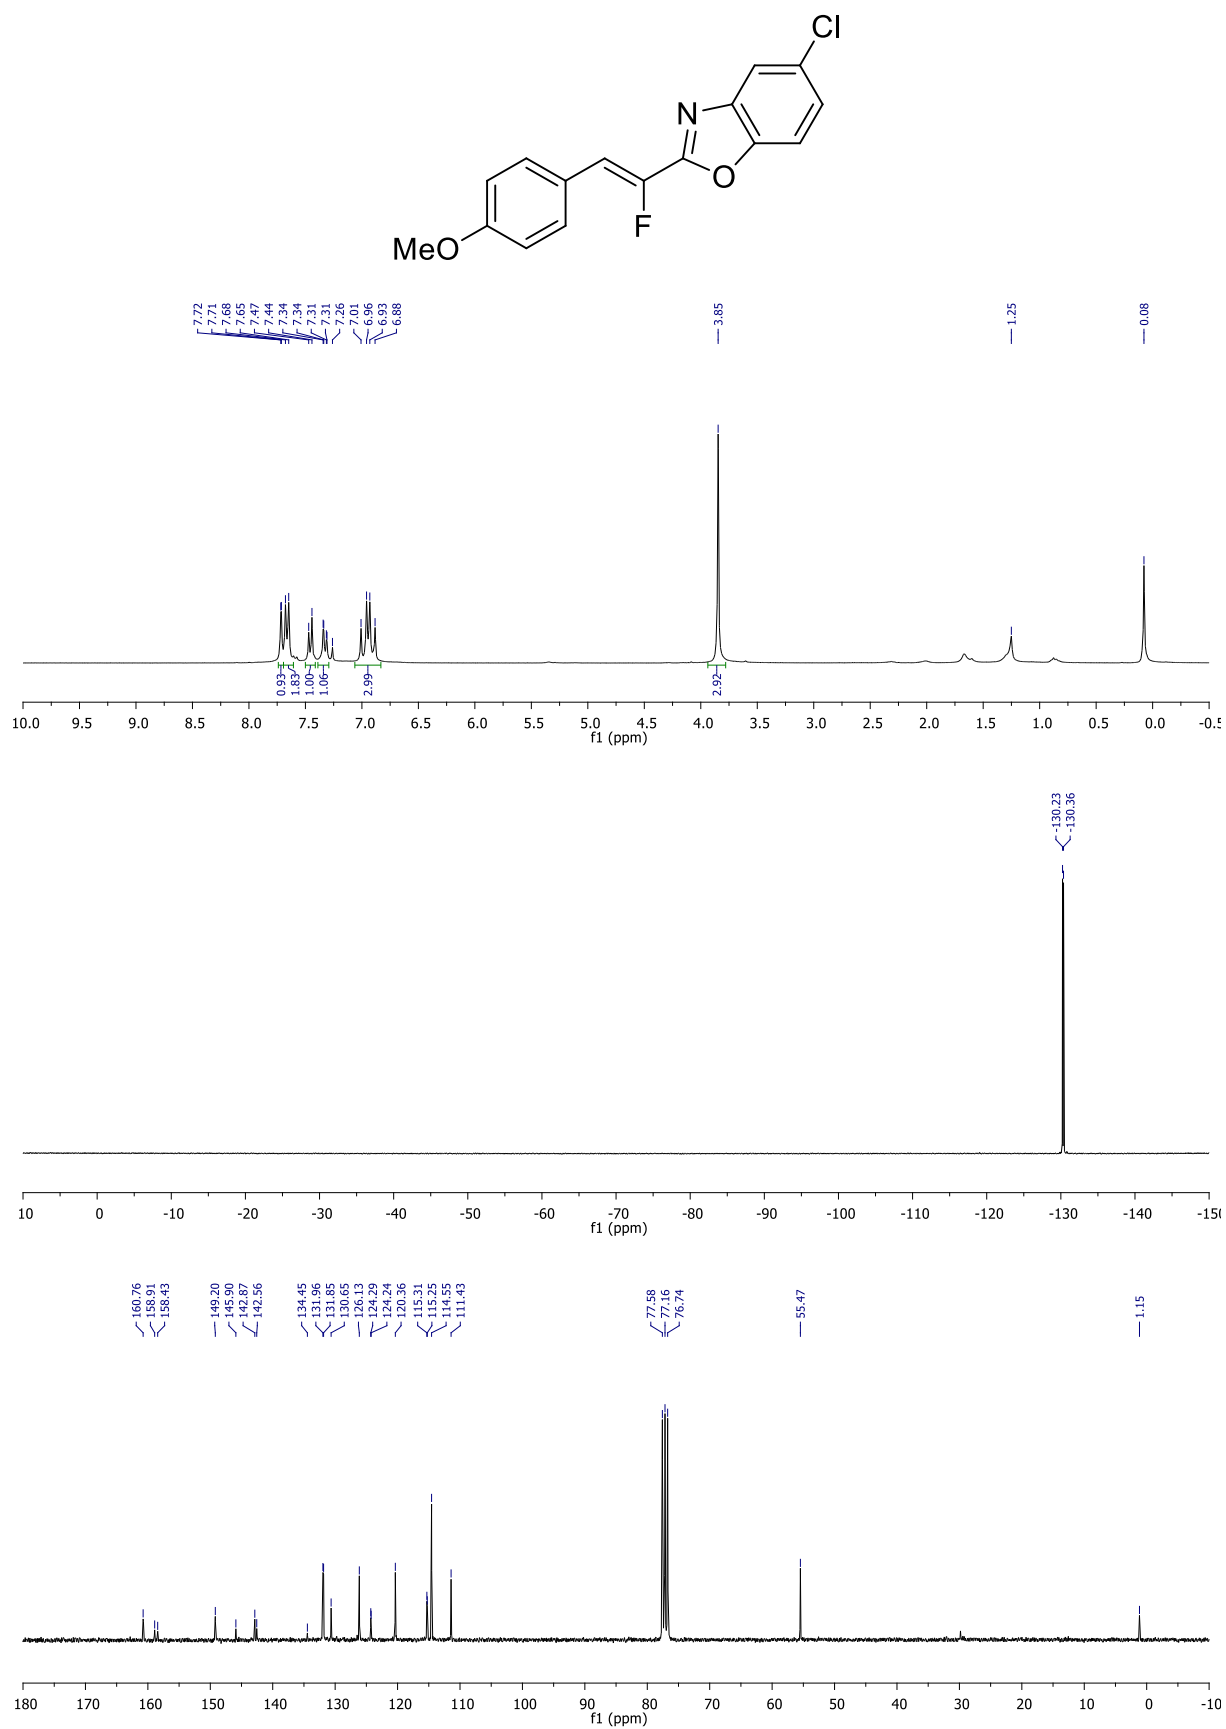



S49

Heteroaryl **4Ba**

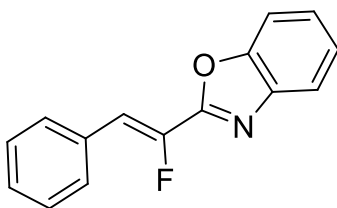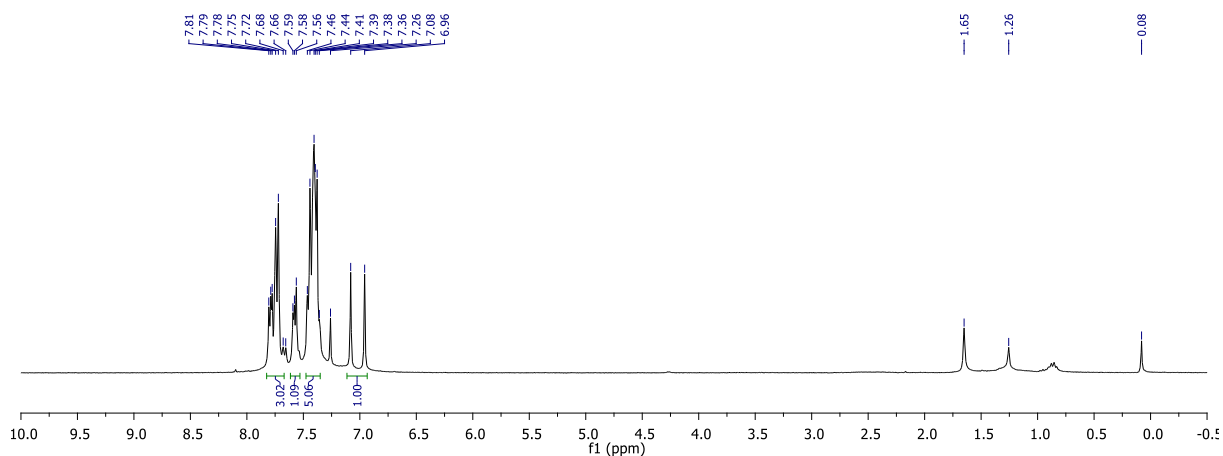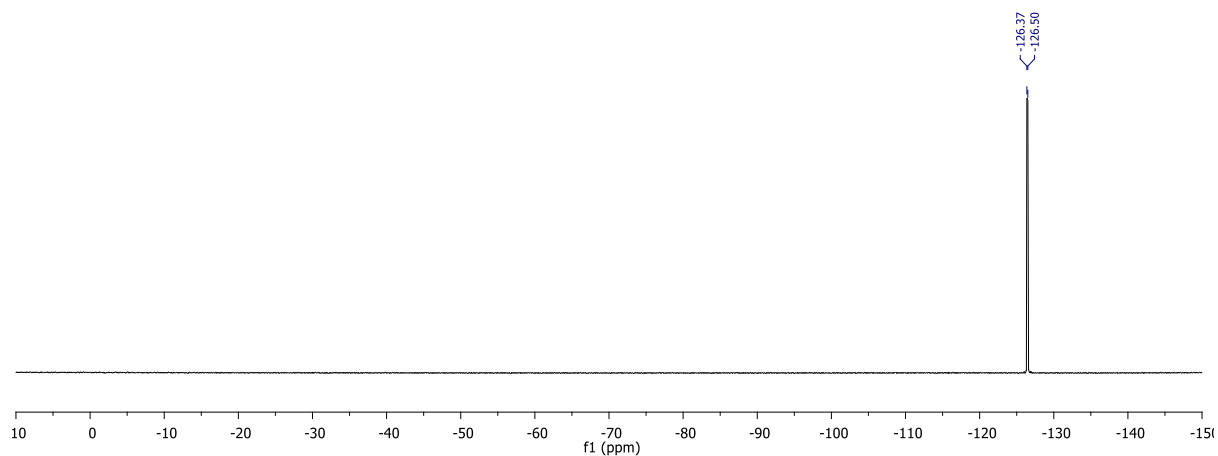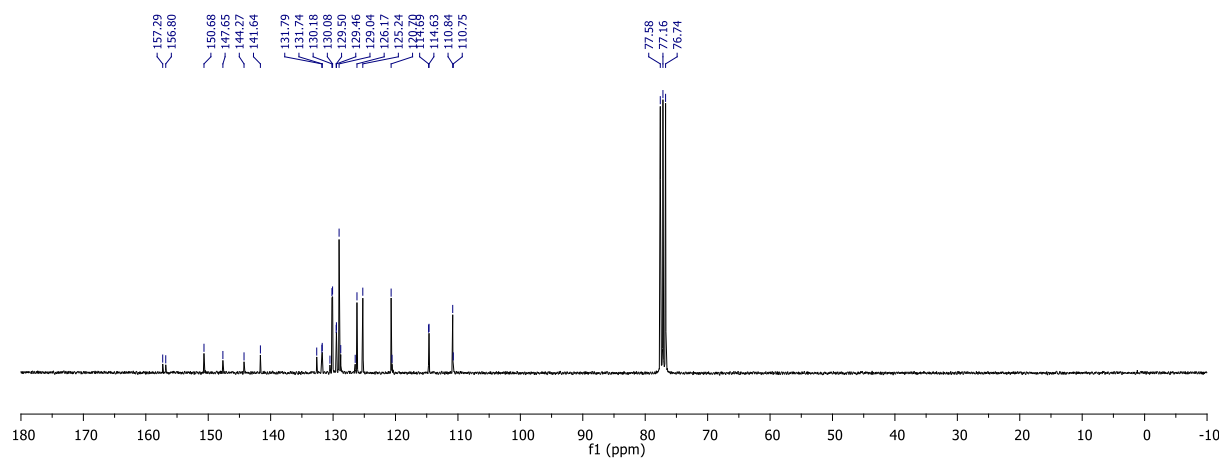

Heteroaryl **4Bc**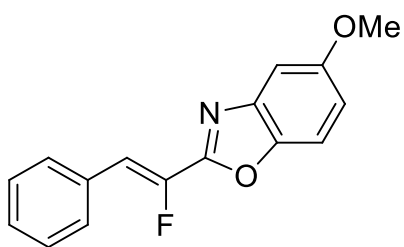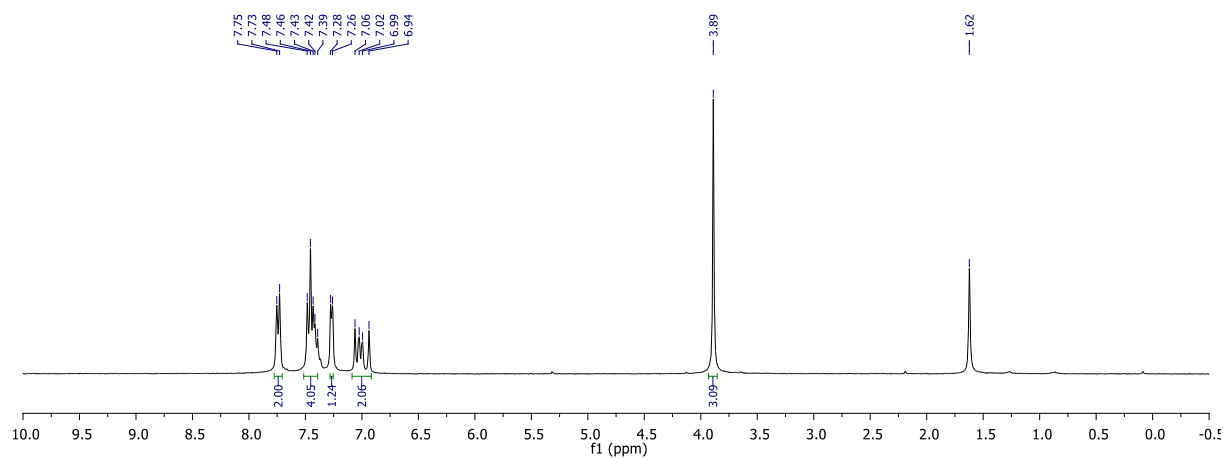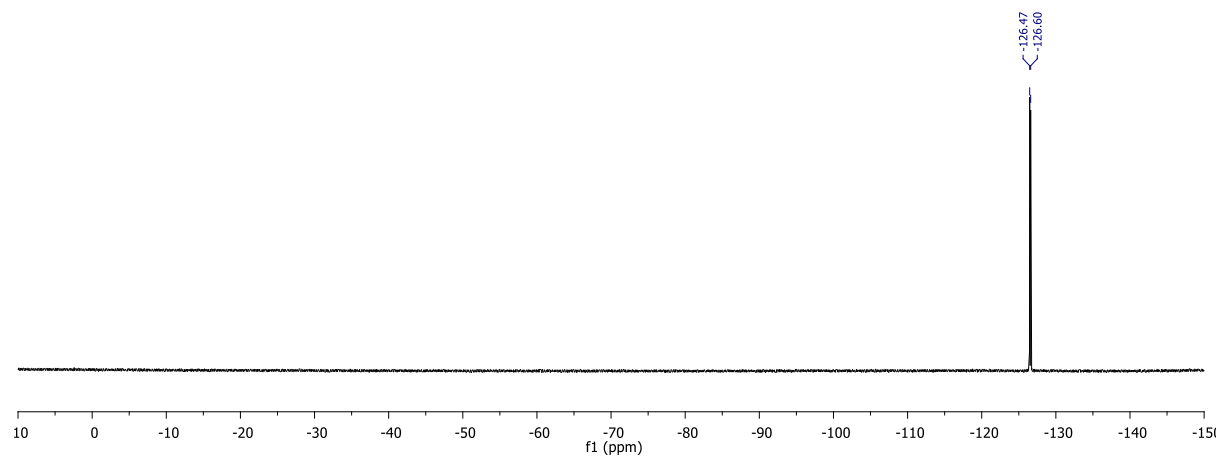

Heteroaryl **4Fa**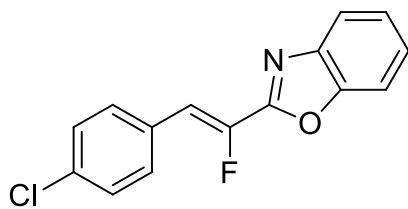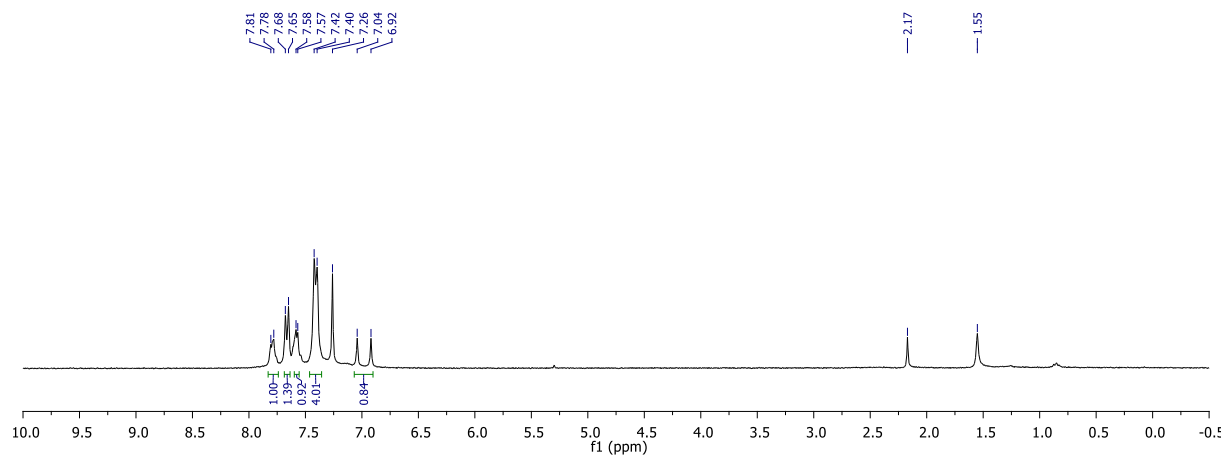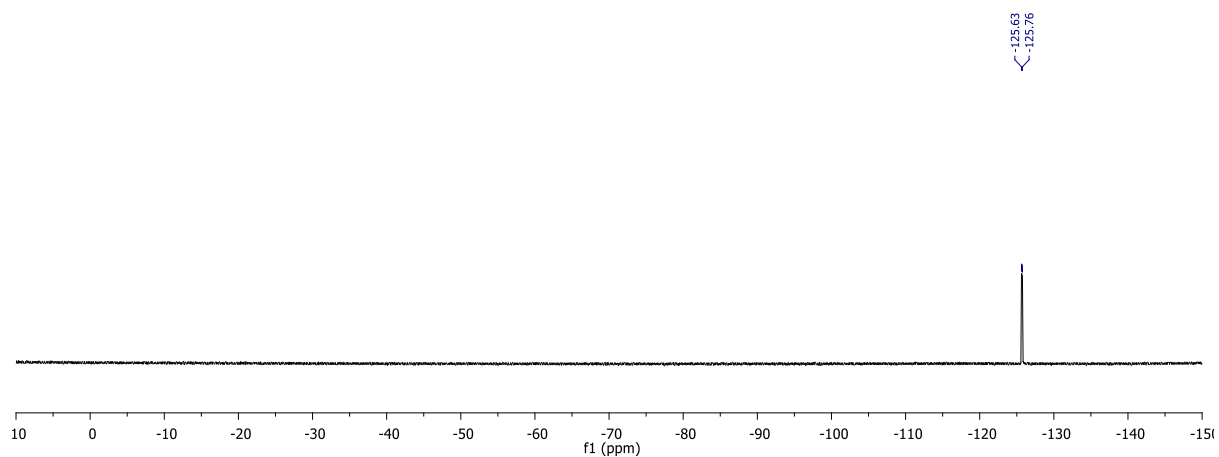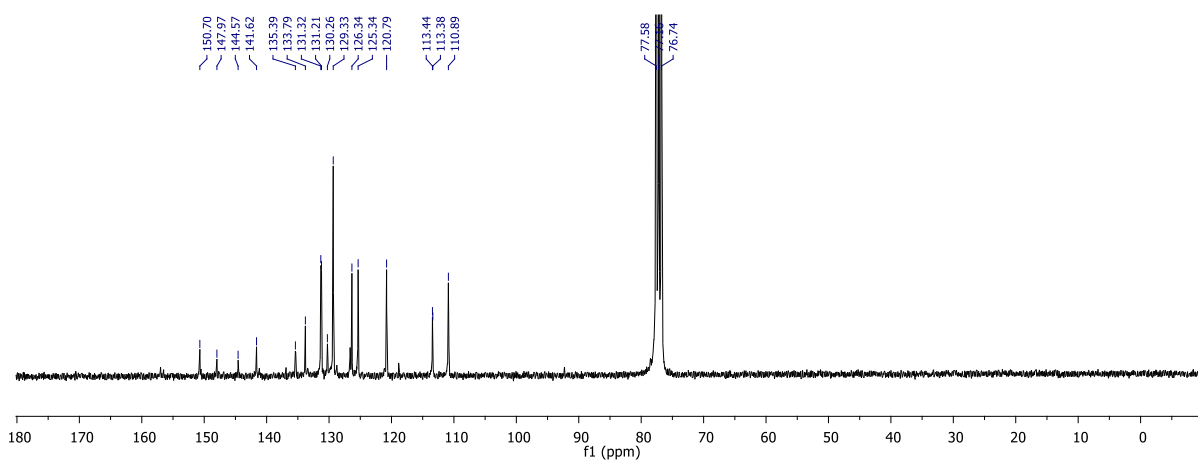

## Heteroaryle 5A

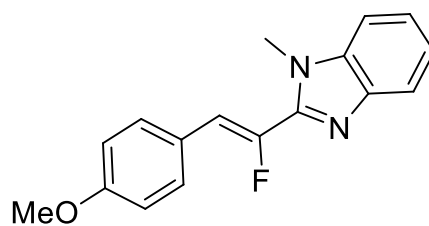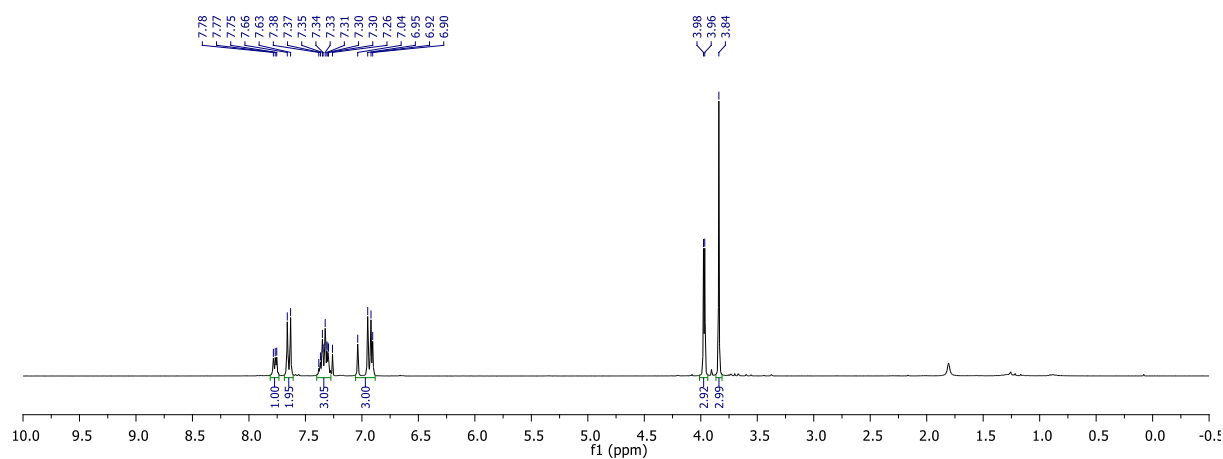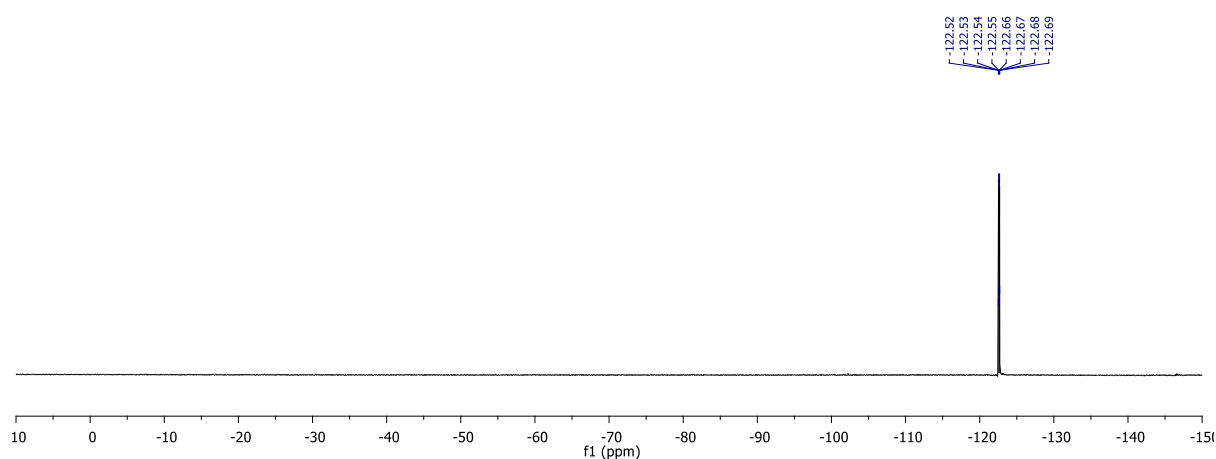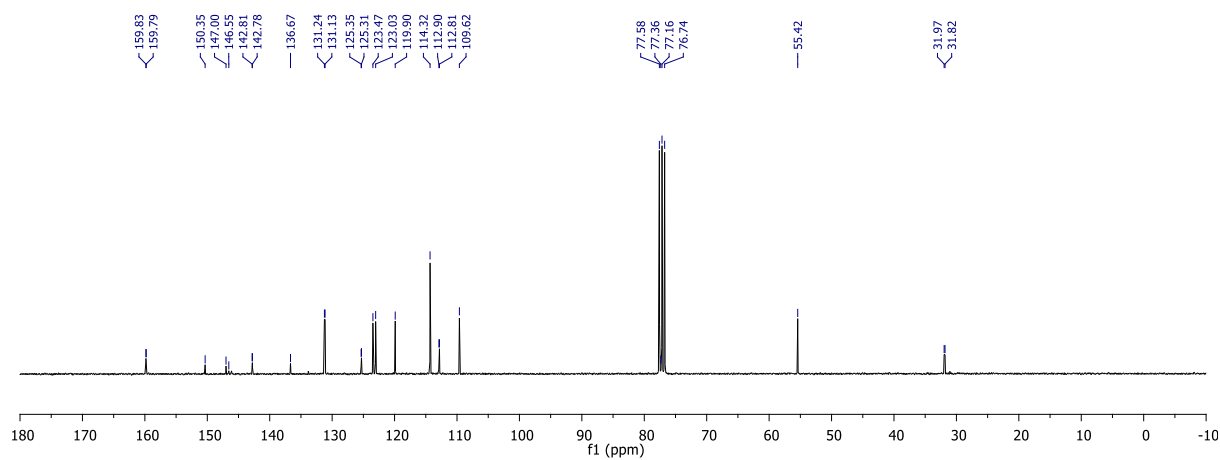

Heteroaryl **5H**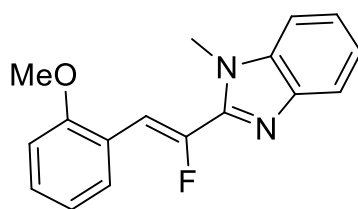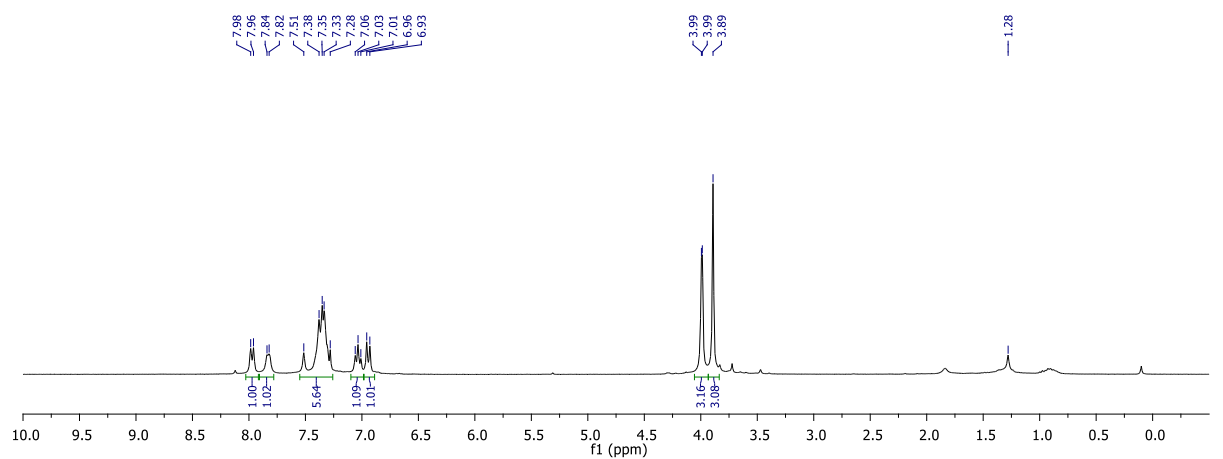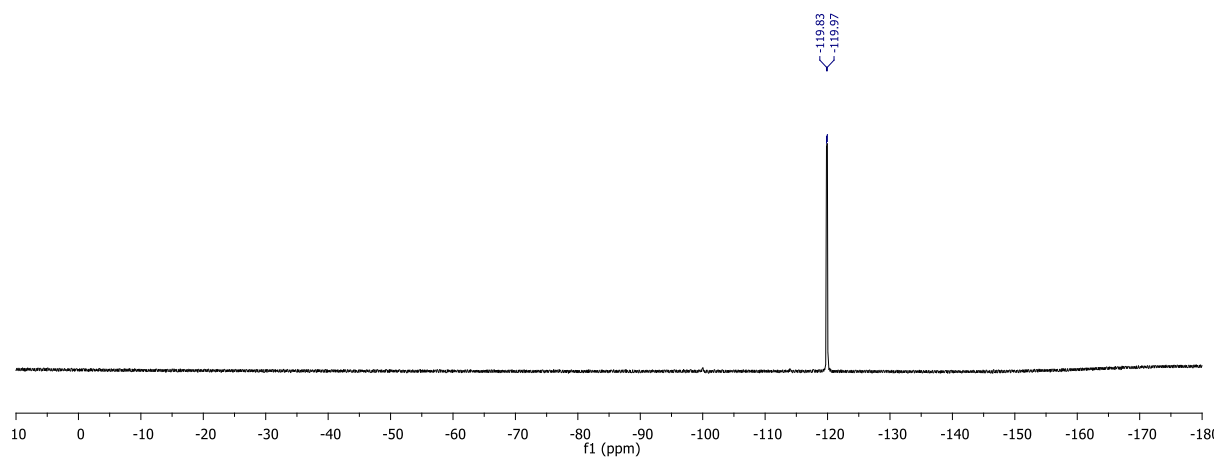

Heteroaryl **6E**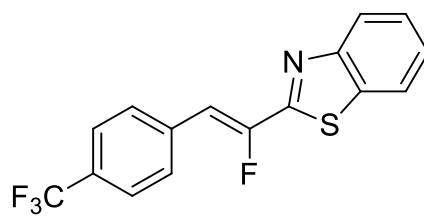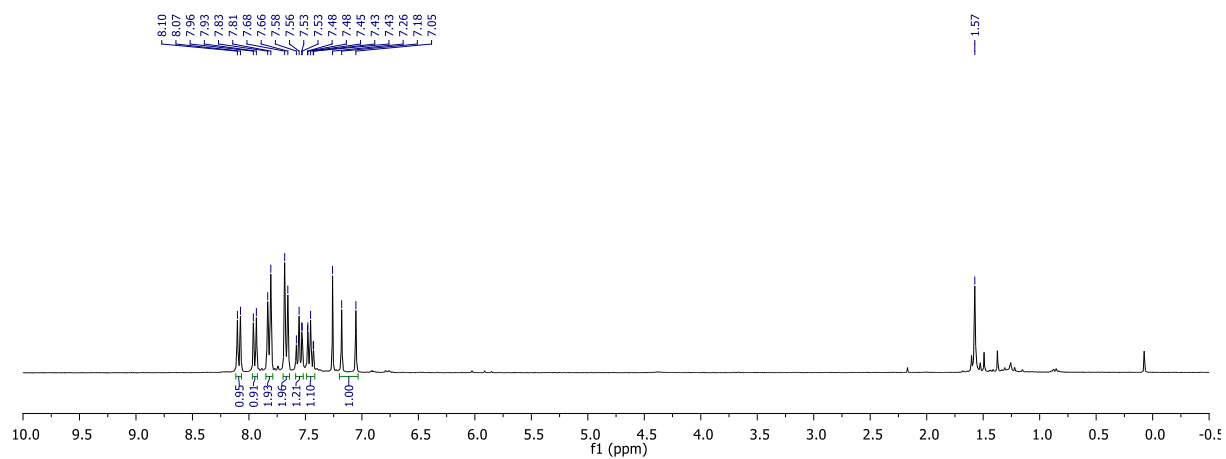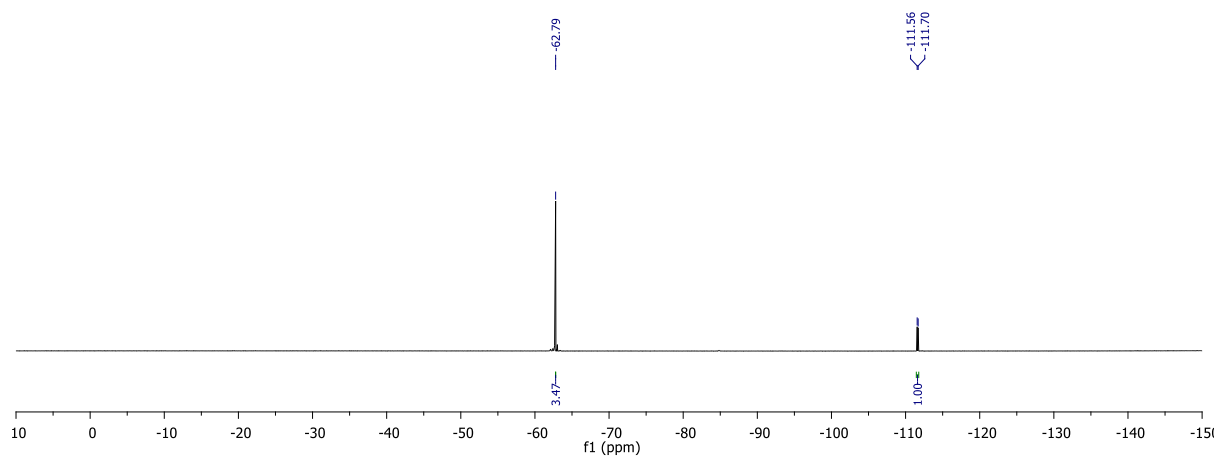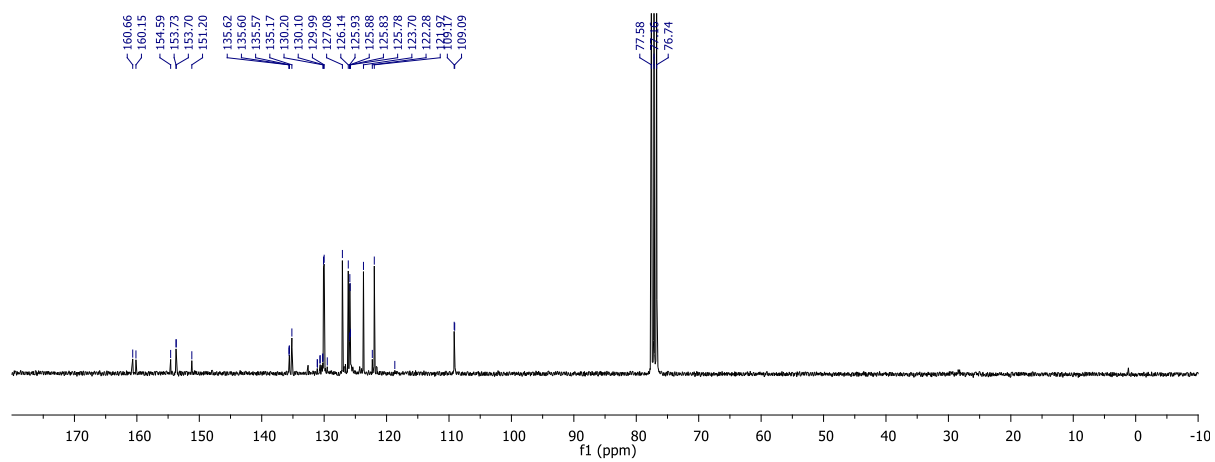

## Heteroaryl 6H

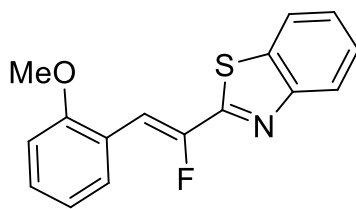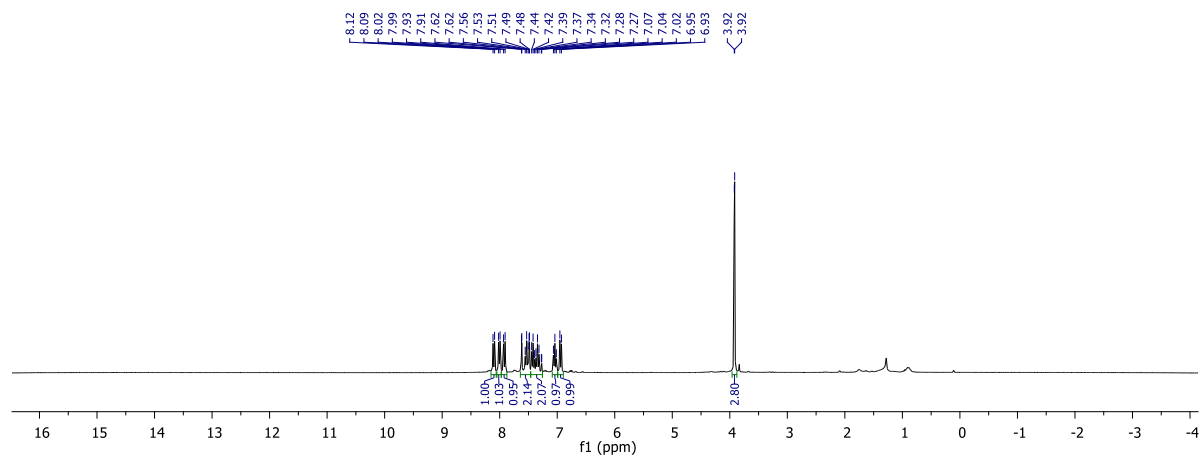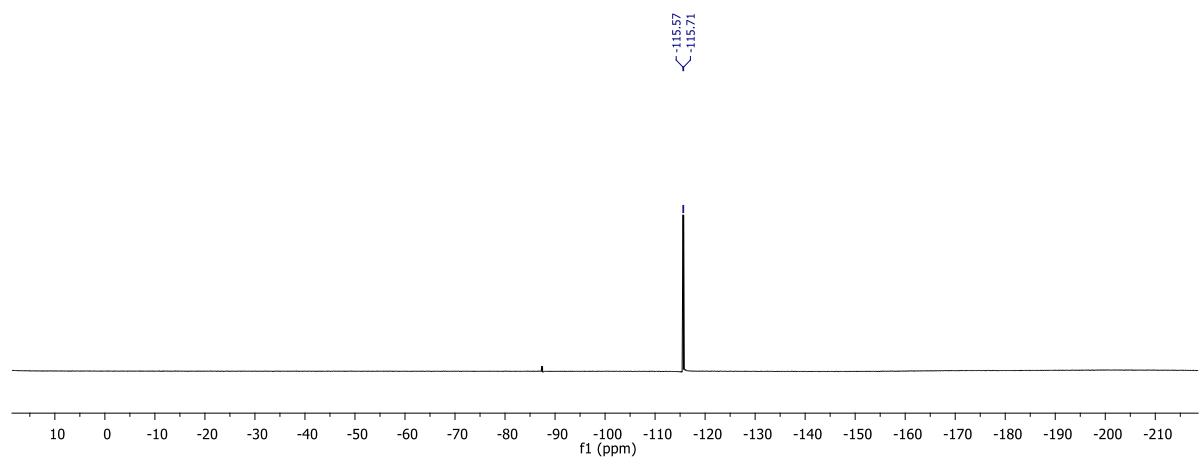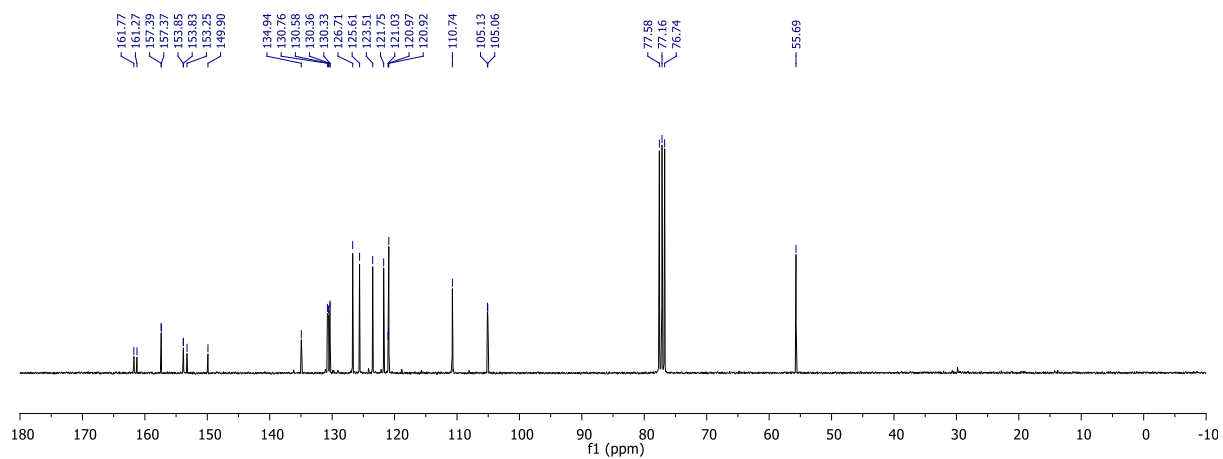

## Heteroaryl 7G

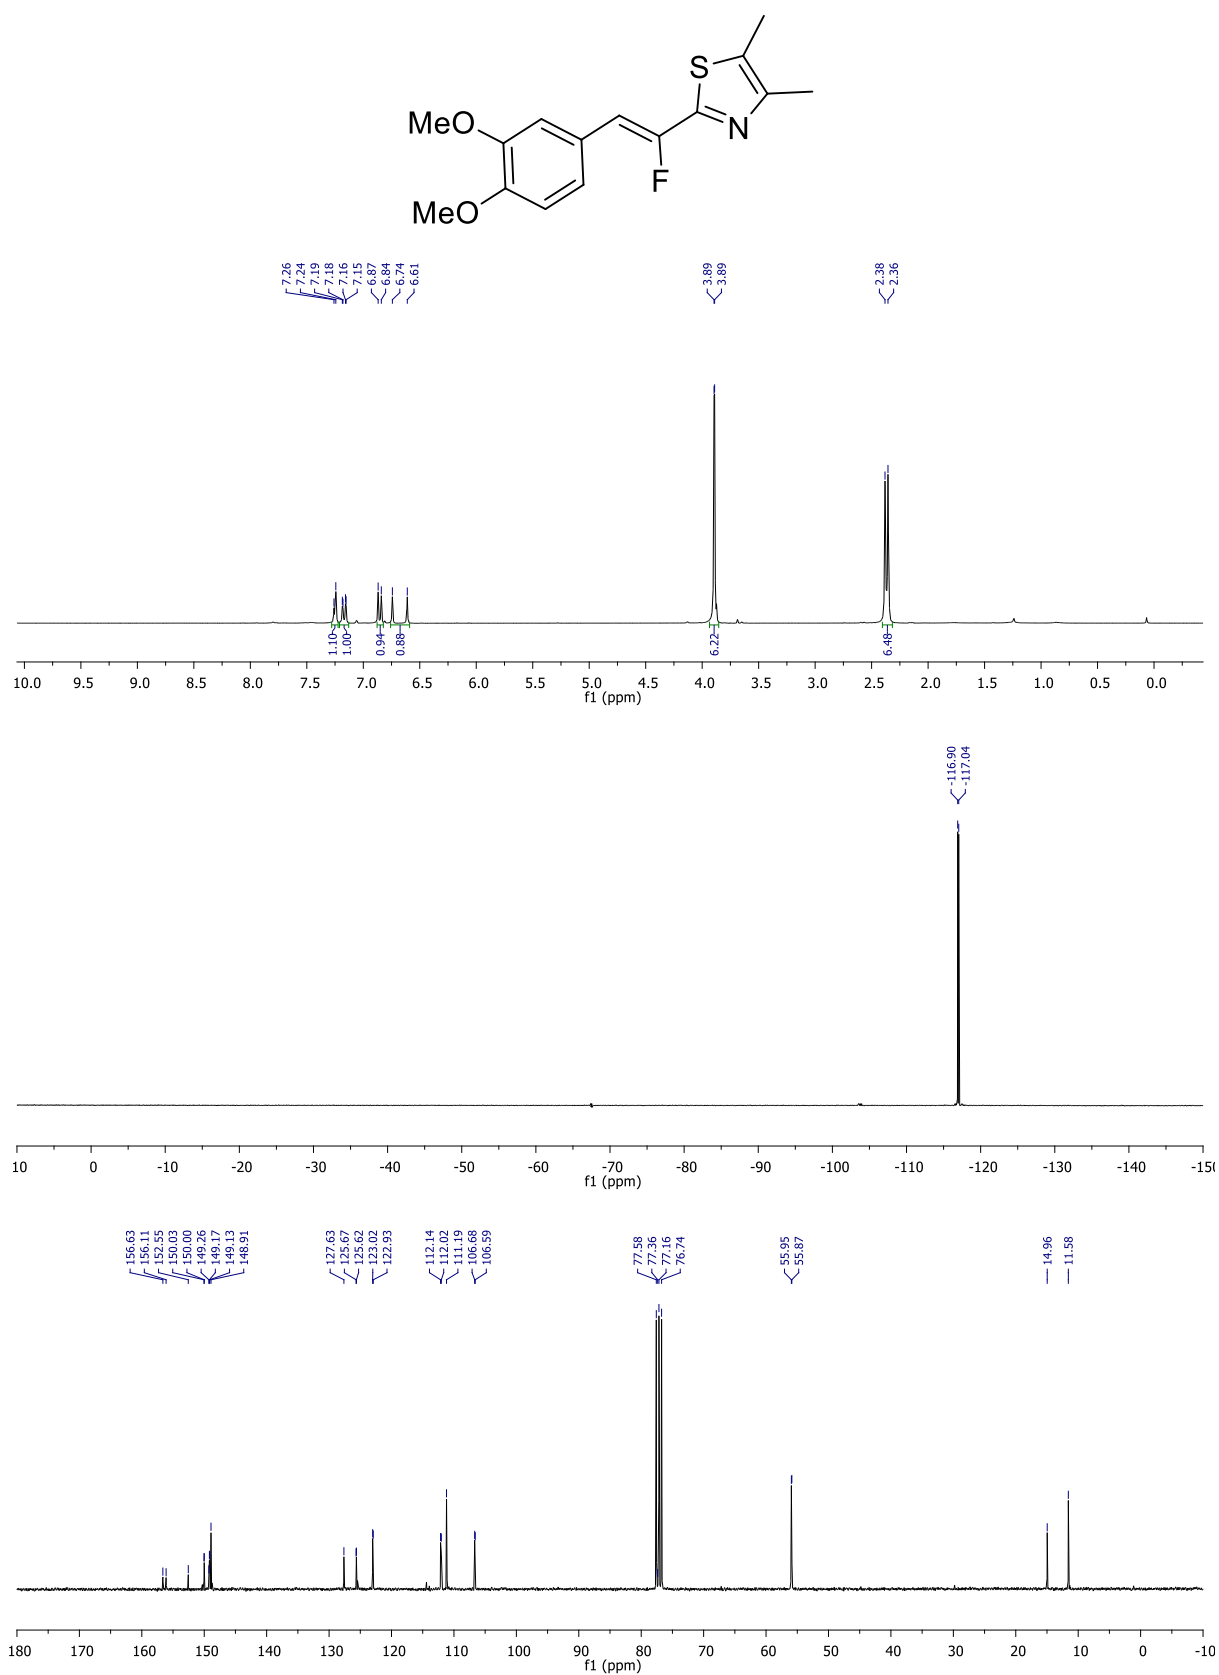

Supplement: c5ob02213d1.pdf [file c5ob02213d1.pdf]
